# Supplementary material for: Human leukocyte antigen (HLA) A-C-B-DRB1-DQB1 haplotype segregation analysis among 2152 families in China and the comparison to expectation-maximization algorithm result
Source: PubMed Central journal article supplement — Chin Med J (Engl). 2021 Mar 26;134(14):1741–3. doi: 10.1097/CM9.0000000000001458 (PMC8318637; doi:10.1097/cm9.0000000000001458), 2021-03-26
Supplement: cm9-134-1741-s001.pdf [file cm9-134-1741-s001.pdf]

**Supplementary table 1** HLA haplotypes observed among 2512 families in China (4n=8608)

| A*    | C*    | B*    | DRB1*     | DQB1* | HF(%) | Rank        |
|-------|-------|-------|-----------|-------|-------|-------------|
| 01:01 | 01:02 | 15:01 | 11:01     | 03:01 | 0.01  | <b>1036</b> |
| 01:01 | 01:02 | 46:01 | 09:01     | 03:03 | 0.05  | <b>286</b>  |
| 01:01 | 01:02 | 54:01 | 04:05     | 04:01 | 0.01  | <b>1036</b> |
| 01:01 | 01:02 | 54:01 | 08:03     | 06:01 | 0.01  | <b>1036</b> |
| 01:01 | 01:02 | 54:01 | 12:01:01G | 03:01 | 0.01  | <b>1036</b> |
| 01:01 | 01:02 | 55:02 | 11:01     | 03:01 | 0.01  | <b>1036</b> |
| 01:01 | 02:02 | 27:05 | 01:01     | 05:01 | 0.01  | <b>1036</b> |
| 01:01 | 02:02 | 27:05 | 04:08     | 03:01 | 0.01  | <b>1036</b> |
| 01:01 | 02:02 | 27:05 | 12:02     | 03:01 | 0.01  | <b>1036</b> |
| 01:01 | 02:02 | 27:05 | 15:01     | 06:02 | 0.10  | <b>115</b>  |
| 01:01 | 03:04 | 13:01 | 15:01     | 06:01 | 0.01  | <b>1036</b> |
| 01:01 | 03:04 | 40:01 | 01:01     | 05:01 | 0.03  | <b>409</b>  |
| 01:01 | 03:04 | 40:01 | 15:01     | 06:02 | 0.01  | <b>1036</b> |
| 01:01 | 03:04 | 40:06 | 09:01     | 03:03 | 0.01  | <b>1036</b> |
| 01:01 | 04:01 | 35:01 | 01:01     | 05:01 | 0.01  | <b>1036</b> |
| 01:01 | 04:01 | 35:01 | 11:01     | 03:01 | 0.01  | <b>1036</b> |
| 01:01 | 04:01 | 35:03 | 08:03     | 06:01 | 0.01  | <b>1036</b> |
| 01:01 | 04:01 | 35:03 | 13:01     | 06:03 | 0.01  | <b>1036</b> |
| 01:01 | 06:02 | 13:02 | 07:01     | 02:02 | 0.07  | <b>177</b>  |
| 01:01 | 06:02 | 15:01 | 15:01     | 06:02 | 0.01  | <b>1036</b> |
| 01:01 | 06:02 | 37:01 | 07:01     | 02:02 | 0.01  | <b>1036</b> |
| 01:01 | 06:02 | 37:01 | 09:01     | 03:02 | 0.01  | <b>1036</b> |
| 01:01 | 06:02 | 37:01 | 09:01     | 03:03 | 0.06  | <b>218</b>  |
| 01:01 | 06:02 | 37:01 | 10:01     | 05:01 | 0.39  | <b>19</b>   |
| 01:01 | 06:02 | 37:01 | 11:01     | 03:01 | 0.03  | <b>409</b>  |
| 01:01 | 06:02 | 37:01 | 12:01     | 03:01 | 0.01  | <b>1036</b> |
| 01:01 | 06:02 | 37:01 | 13:02     | 06:09 | 0.01  | <b>1036</b> |
| 01:01 | 06:02 | 37:01 | 14:03     | 03:01 | 0.01  | <b>1036</b> |
| 01:01 | 06:02 | 37:01 | 14:05     | 05:03 | 0.01  | <b>1036</b> |
| 01:01 | 06:02 | 37:01 | 14:54     | 05:02 | 0.01  | <b>1036</b> |
| 01:01 | 06:02 | 37:01 | 16:02     | 05:02 | 0.01  | <b>1036</b> |
| 01:01 | 06:02 | 40:06 | 09:01     | 03:03 | 0.01  | <b>1036</b> |
| 01:01 | 06:02 | 47:01 | 13:02     | 06:04 | 0.01  | <b>1036</b> |
| 01:01 | 06:02 | 50:01 | 07:01     | 02:02 | 0.02  | <b>572</b>  |
| 01:01 | 06:02 | 52:01 | 09:01     | 03:03 | 0.01  | <b>1036</b> |
| 01:01 | 06:02 | 55:02 | 09:01     | 03:03 | 0.01  | <b>1036</b> |
| 01:01 | 06:02 | 57:01 | 04:05     | 04:01 | 0.01  | <b>1036</b> |
| 01:01 | 06:02 | 57:01 | 04:06     | 03:02 | 0.01  | <b>1036</b> |
| 01:01 | 06:02 | 57:01 | 07:01     | 02:02 | 0.05  | <b>286</b>  |
| 01:01 | 06:02 | 57:01 | 07:01     | 03:03 | 0.53  | <b>12</b>   |
| 01:01 | 06:02 | 57:01 | 08:01     | 04:02 | 0.01  | <b>1036</b> |
| 01:01 | 06:02 | 57:01 | 09:01     | 03:03 | 0.03  | <b>409</b>  |
| 01:01 | 06:02 | 57:01 | 12:02     | 03:01 | 0.01  | <b>1036</b> |
| 01:01 | 06:02 | 57:01 | 13:01     | 06:03 | 0.05  | <b>286</b>  |
| 01:01 | 06:02 | 57:01 | 15:01     | 06:02 | 0.03  | <b>409</b>  |
| 01:01 | 06:02 | 57:01 | 15:02     | 05:02 | 0.01  | <b>1036</b> |
| 01:01 | 07:01 | 15:17 | 13:02     | 06:04 | 0.07  | <b>177</b>  |
| 01:01 | 07:01 | 41:01 | 03:01     | 02:01 | 0.01  | <b>1036</b> |
| 01:01 | 07:01 | 49:01 | 04:02     | 03:02 | 0.01  | <b>1036</b> |
| 01:01 | 07:01 | 49:01 | 13:02     | 06:04 | 0.01  | <b>1036</b> |
| 01:01 | 07:02 | 07:02 | 04:04     | 03:02 | 0.01  | <b>1036</b> |
| 01:01 | 07:02 | 07:02 | 15:01     | 06:02 | 0.05  | <b>286</b>  |
| 01:01 | 07:02 | 08:01 | 03:01     | 02:01 | 0.05  | <b>286</b>  |
| 01:01 | 07:02 | 08:01 | 04:08     | 03:01 | 0.01  | <b>1036</b> |
| 01:01 | 07:02 | 08:01 | 07:01     | 02:02 | 0.01  | <b>1036</b> |
| 01:01 | 07:02 | 08:01 | 08:03     | 06:01 | 0.01  | <b>1036</b> |
| 01:01 | 07:02 | 38:02 | 15:02     | 05:01 | 0.02  | <b>572</b>  |
| 01:01 | 07:02 | 40:01 | 12:01     | 03:01 | 0.01  | <b>1036</b> |
| 01:01 | 07:02 | 67:01 | 12:01:01G | 03:01 | 0.01  | <b>1036</b> |
| 01:01 | 07:04 | 15:18 | 04:01     | 03:01 | 0.01  | <b>1036</b> |
| 01:01 | 07:06 | 44:03 | 07:01     | 02:02 | 0.01  | <b>1036</b> |

|       |              |       |           |       |      |             |
|-------|--------------|-------|-----------|-------|------|-------------|
| 01:01 | 06:103       | 37:01 | 10:01     | 05:01 | 0.01 | <b>1036</b> |
| 01:01 | 08:01        | 15:02 | 15:01     | 06:01 | 0.01 | <b>1036</b> |
| 01:01 | 08:01        | 35:01 | 12:01     | 03:01 | 0.01 | <b>1036</b> |
| 01:01 | 12:02        | 13:02 | 07:01     | 02:02 | 0.01 | <b>1036</b> |
| 01:01 | 12:02        | 52:01 | 04:04     | 03:02 | 0.01 | <b>1036</b> |
| 01:01 | 12:02        | 52:01 | 09:01     | 03:03 | 0.01 | <b>1036</b> |
| 01:01 | 12:02        | 52:01 | 15:02     | 06:01 | 0.08 | <b>151</b>  |
| 01:01 | 12:03        | 35:03 | 07:01     | 03:03 | 0.01 | <b>1036</b> |
| 01:01 | 12:03        | 35:03 | 14:54     | 05:03 | 0.01 | <b>1036</b> |
| 01:01 | 14:02        | 51:01 | 04:05     | 04:01 | 0.01 | <b>1036</b> |
| 01:01 | 14:02        | 51:01 | 11:01     | 03:01 | 0.01 | <b>1036</b> |
| 01:01 | 14:02        | 51:01 | 14:03     | 03:01 | 0.01 | <b>1036</b> |
| 01:01 | 15:02        | 40:02 | 09:01     | 03:03 | 0.01 | <b>1036</b> |
| 01:01 | 15:02        | 40:06 | 11:01     | 03:01 | 0.01 | <b>1036</b> |
| 01:01 | 15:02        | 51:02 | 15:01     | 06:02 | 0.01 | <b>1036</b> |
| 01:01 | 15:13        | 51:01 | 04:02     | 03:02 | 0.01 | <b>1036</b> |
| 01:01 | 16:02        | 51:01 | 04:01     | 03:02 | 0.01 | <b>1036</b> |
| 01:01 | 04:01:01G(2) | 44:03 | 07:01     | 02:02 | 0.03 | <b>409</b>  |
|       | 04:01(1)     |       |           |       |      |             |
| 01:01 | 08:01:01G    | 40:06 | 12:01:01G | 03:01 | 0.01 | <b>1036</b> |
| 01:01 | 08:01:01G(1) | 15:18 | 15:01     | 06:02 | 0.02 | <b>572</b>  |
|       | 08:01(1)     |       |           |       |      |             |
| 01:01 | 17:01:01G(1) | 41:01 | 07:01     | 03:03 | 0.02 | <b>572</b>  |
|       | 17:01(1)     |       |           |       |      |             |
| 01:03 | 15:05        | 73:01 | 04:05     | 02:02 | 0.01 | <b>1036</b> |
| 02:01 | 01:02        | 15:01 | 03:01     | 02:01 | 0.01 | <b>1036</b> |
| 02:01 | 01:02        | 15:01 | 08:03     | 06:01 | 0.01 | <b>1036</b> |
| 02:01 | 01:02        | 15:01 | 09:01     | 03:03 | 0.07 | <b>177</b>  |
| 02:01 | 01:02        | 15:01 | 12:01     | 03:01 | 0.05 | <b>286</b>  |
| 02:01 | 01:02        | 15:01 | 12:02     | 03:01 | 0.01 | <b>1036</b> |
| 02:01 | 01:02        | 15:01 | 14:54     | 05:02 | 0.01 | <b>1036</b> |
| 02:01 | 01:02        | 15:07 | 09:01     | 03:03 | 0.02 | <b>572</b>  |
| 02:01 | 01:02        | 15:11 | 09:01     | 03:03 | 0.01 | <b>1036</b> |
| 02:01 | 01:02        | 15:58 | 09:01     | 03:03 | 0.01 | <b>1036</b> |
| 02:01 | 01:02        | 27:04 | 12:02     | 03:01 | 0.01 | <b>1036</b> |
| 02:01 | 01:02        | 27:05 | 01:01     | 05:01 | 0.06 | <b>218</b>  |
| 02:01 | 01:02        | 27:05 | 04:01     | 03:01 | 0.01 | <b>1036</b> |
| 02:01 | 01:02        | 35:01 | 08:03     | 06:01 | 0.01 | <b>1036</b> |
| 02:01 | 01:02        | 35:01 | 09:01     | 03:03 | 0.01 | <b>1036</b> |
| 02:01 | 01:02        | 40:01 | 04:03     | 03:02 | 0.01 | <b>1036</b> |
| 02:01 | 01:02        | 40:02 | 04:06     | 03:02 | 0.01 | <b>1036</b> |
| 02:01 | 01:02        | 40:02 | 09:01     | 03:03 | 0.01 | <b>1036</b> |
| 02:01 | 01:02        | 40:02 | 14:03     | 03:01 | 0.01 | <b>1036</b> |
| 02:01 | 01:02        | 44:03 | 12:02     | 03:01 | 0.01 | <b>1036</b> |
| 02:01 | 01:02        | 46:01 | 04:03     | 03:02 | 0.01 | <b>1036</b> |
| 02:01 | 01:02        | 46:01 | 04:05     | 03:03 | 0.01 | <b>1036</b> |
| 02:01 | 01:02        | 46:01 | 04:05     | 04:01 | 0.01 | <b>1036</b> |
| 02:01 | 01:02        | 46:01 | 04:06     | 03:02 | 0.02 | <b>572</b>  |
| 02:01 | 01:02        | 46:01 | 07:01     | 02:02 | 0.01 | <b>1036</b> |
| 02:01 | 01:02        | 46:01 | 08:03     | 06:01 | 0.19 | <b>50</b>   |
| 02:01 | 01:02        | 46:01 | 09:01     | 03:02 | 0.01 | <b>1036</b> |
| 02:01 | 01:02        | 46:01 | 09:01     | 03:03 | 0.30 | <b>30</b>   |
| 02:01 | 01:02        | 46:01 | 10:01     | 05:01 | 0.01 | <b>1036</b> |
| 02:01 | 01:02        | 46:01 | 12:02     | 03:01 | 0.02 | <b>572</b>  |
| 02:01 | 01:02        | 46:01 | 13:02     | 06:09 | 0.01 | <b>1036</b> |
| 02:01 | 01:02        | 46:01 | 14:05     | 05:03 | 0.01 | <b>1036</b> |
| 02:01 | 01:02        | 46:01 | 14:54     | 05:02 | 0.01 | <b>1036</b> |
| 02:01 | 01:02        | 46:01 | 16:02     | 05:02 | 0.01 | <b>1036</b> |
| 02:01 | 01:02        | 48:01 | 15:01     | 06:02 | 0.01 | <b>1036</b> |
| 02:01 | 01:02        | 51:01 | 08:03     | 06:01 | 0.03 | <b>409</b>  |
| 02:01 | 01:02        | 52:01 | 11:01     | 03:01 | 0.01 | <b>1036</b> |
| 02:01 | 01:02        | 54:01 | 04:05     | 04:01 | 0.24 | <b>36</b>   |
| 02:01 | 01:02        | 54:01 | 07:01     | 02:02 | 0.01 | <b>1036</b> |

|       |       |           |                          |       |      |      |
|-------|-------|-----------|--------------------------|-------|------|------|
| 02:01 | 01:02 | 54:01     | 08:03                    | 06:01 | 0.05 | 286  |
| 02:01 | 01:02 | 54:01     | 09:01                    | 03:03 | 0.02 | 572  |
| 02:01 | 01:02 | 54:01     | 11:01                    | 03:01 | 0.03 | 409  |
| 02:01 | 01:02 | 54:01     | 12:02                    | 03:01 | 0.02 | 572  |
| 02:01 | 01:02 | 54:01     | 13:01                    | 06:03 | 0.01 | 1036 |
| 02:01 | 01:02 | 54:01     | 13:02                    | 06:09 | 0.01 | 1036 |
| 02:01 | 01:02 | 54:01     | 14:05                    | 05:03 | 0.05 | 286  |
| 02:01 | 01:02 | 54:01     | 15:01                    | 06:02 | 0.02 | 572  |
| 02:01 | 01:02 | 54:01     | 16:02                    | 05:02 | 0.02 | 572  |
| 02:01 | 01:02 | 55:01     | 11:01                    | 03:01 | 0.01 | 1036 |
| 02:01 | 01:02 | 55:01     | 13:01                    | 06:03 | 0.01 | 1036 |
| 02:01 | 01:02 | 55:02     | 04:03                    | 03:02 | 0.01 | 1036 |
| 02:01 | 01:02 | 55:02     | 04:04                    | 03:02 | 0.01 | 1036 |
| 02:01 | 01:02 | 55:02     | 04:05                    | 04:01 | 0.01 | 1036 |
| 02:01 | 01:02 | 55:02     | 04:06                    | 03:02 | 0.01 | 1036 |
| 02:01 | 01:02 | 55:02     | 08:02                    | 03:01 | 0.01 | 1036 |
| 02:01 | 01:02 | 55:02     | 09:01                    | 03:03 | 0.02 | 572  |
| 02:01 | 01:02 | 55:02     | 11:01                    | 03:02 | 0.01 | 1036 |
| 02:01 | 01:02 | 55:02     | 12:01                    | 03:01 | 0.01 | 1036 |
| 02:01 | 01:02 | 55:02     | 12:02                    | 03:01 | 0.02 | 572  |
| 02:01 | 01:02 | 55:02     | 12:02                    | 05:03 | 0.01 | 1036 |
| 02:01 | 01:02 | 55:02     | 14:05                    | 05:03 | 0.01 | 1036 |
| 02:01 | 01:02 | 55:02     | 15:01                    | 03:01 | 0.01 | 1036 |
| 02:01 | 01:02 | 55:02     | 15:01                    | 06:02 | 0.06 | 218  |
| 02:01 | 01:02 | 56:01     | 01:01                    | 05:01 | 0.01 | 1036 |
| 02:01 | 01:02 | 56:01     | 15:01                    | 06:02 | 0.01 | 1036 |
| 02:01 | 01:02 | 56:04     | 14:04                    | 05:03 | 0.01 | 1036 |
| 02:01 | 01:02 | 56:04     | 15:02                    | 05:01 | 0.01 | 1036 |
| 02:01 | 01:02 | 40:40:01G | 12:01                    | 03:01 | 0.01 | 1036 |
| 02:01 | 01:03 | 46:01     | 09:01                    | 03:03 | 0.03 | 409  |
| 02:01 | 01:06 | 35:01     | 15:01                    | 06:02 | 0.01 | 1036 |
| 02:01 | 01:06 | 55:02     | 04:06                    | 03:02 | 0.01 | 1036 |
| 02:01 | 01:06 | 55:02     | 09:01                    | 03:03 | 0.01 | 1036 |
| 02:01 | 01:08 | 46:01     | 09:01                    | 03:03 | 0.01 | 1036 |
| 02:01 | 02:02 | 27:05     | 04:01                    | 03:02 | 0.01 | 1036 |
| 02:01 | 02:02 | 27:05     | 04:03                    | 03:02 | 0.01 | 1036 |
| 02:01 | 02:02 | 27:05     | 13:01                    | 06:03 | 0.01 | 1036 |
| 02:01 | 02:02 | 27:05     | 15:01                    | 06:02 | 0.01 | 1036 |
| 02:01 | 03:02 | 52:01     | 04:05                    | 04:01 | 0.01 | 1036 |
| 02:01 | 03:02 | 52:01     | 15:02                    | 06:01 | 0.01 | 1036 |
| 02:01 | 03:02 | 58:01     | 03:01                    | 02:01 | 0.05 | 286  |
| 02:01 | 03:02 | 58:01     | 04:02                    | 03:02 | 0.01 | 1036 |
| 02:01 | 03:02 | 58:01     | 09:01                    | 03:03 | 0.01 | 1036 |
| 02:01 | 03:02 | 58:01     | 12:01                    | 03:01 | 0.01 | 1036 |
| 02:01 | 03:02 | 58:01     | 13:02                    | 06:09 | 0.02 | 572  |
| 02:01 | 03:03 | 13:01     | 13:12                    | 03:01 | 0.01 | 1036 |
| 02:01 | 03:03 | 13:01     | 14:05                    | 05:03 | 0.01 | 1036 |
| 02:01 | 03:03 | 15:01     | 03:01                    | 02:01 | 0.01 | 1036 |
| 02:01 | 03:03 | 15:01     | 04:05                    | 03:02 | 0.01 | 1036 |
| 02:01 | 03:03 | 15:01     | 04:05                    | 04:01 | 0.01 | 1036 |
| 02:01 | 03:03 | 15:01     | 04:06                    | 03:02 | 0.02 | 572  |
| 02:01 | 03:03 | 15:01     | 08:03                    | 06:01 | 0.05 | 286  |
| 02:01 | 03:03 | 15:01     | 08:09                    | 04:02 | 0.01 | 1036 |
| 02:01 | 03:03 | 15:01     | 09:01                    | 03:03 | 0.07 | 177  |
| 02:01 | 03:03 | 15:01     | 11:01                    | 03:01 | 0.08 | 151  |
| 02:01 | 03:03 | 15:01     | 12:02                    | 03:01 | 0.01 | 1036 |
| 02:01 | 03:03 | 15:01     | 14:05                    | 05:03 | 0.02 | 572  |
| 02:01 | 03:03 | 15:01     | 15:01                    | 06:01 | 0.01 | 1036 |
| 02:01 | 03:03 | 15:01     | 15:01                    | 06:02 | 0.13 | 85   |
| 02:01 | 03:03 | 15:01     | 12:01:01G(1)<br>12:10(1) | 03:01 | 0.02 | 572  |
| 02:01 | 03:03 | 15:11     | 03:01                    | 02:01 | 0.02 | 572  |
| 02:01 | 03:03 | 15:11     | 04:01                    | 03:01 | 0.01 | 1036 |

|       |       |        |                      |       |      |      |
|-------|-------|--------|----------------------|-------|------|------|
| 02:01 | 03:03 | 15:11  | 04:03                | 03:02 | 0.01 | 1036 |
| 02:01 | 03:03 | 15:11  | 04:05                | 04:01 | 0.03 | 409  |
| 02:01 | 03:03 | 15:11  | 07:01                | 02:02 | 0.02 | 572  |
| 02:01 | 03:03 | 15:11  | 08:03                | 06:01 | 0.02 | 572  |
| 02:01 | 03:03 | 15:11  | 09:01                | 03:03 | 0.60 | 9    |
| 02:01 | 03:03 | 15:11  | 10:01                | 05:01 | 0.01 | 1036 |
| 02:01 | 03:03 | 15:11  | 11:01                | 03:01 | 0.02 | 572  |
| 02:01 | 03:03 | 15:11  | 12:02                | 03:01 | 0.03 | 409  |
| 02:01 | 03:03 | 15:11  | 13:01                | 06:03 | 0.01 | 1036 |
| 02:01 | 03:03 | 15:11  | 14:05                | 05:03 | 0.01 | 1036 |
| 02:01 | 03:03 | 15:11  | 14:54                | 05:02 | 0.02 | 572  |
| 02:01 | 03:03 | 15:11  | 15:01                | 03:01 | 0.01 | 1036 |
| 02:01 | 03:03 | 15:11  | 15:01                | 05:03 | 0.02 | 572  |
| 02:01 | 03:03 | 15:11  | 15:01                | 06:01 | 0.01 | 1036 |
| 02:01 | 03:03 | 15:11  | 15:01                | 06:02 | 0.07 | 177  |
| 02:01 | 03:03 | 15:11  | 16:02                | 05:02 | 0.01 | 1036 |
| 02:01 | 03:03 | 15:11  | 12:01(3)<br>12:10(2) | 03:01 | 0.06 | 218  |
| 02:01 | 03:03 | 15:12  | 12:02                | 03:01 | 0.01 | 1036 |
| 02:01 | 03:03 | 15:305 | 09:01                | 03:03 | 0.01 | 1036 |
| 02:01 | 03:03 | 35:01  | 04:05                | 04:01 | 0.01 | 1036 |
| 02:01 | 03:03 | 35:01  | 04:06                | 03:02 | 0.01 | 1036 |
| 02:01 | 03:03 | 35:01  | 04:10                | 04:02 | 0.01 | 1036 |
| 02:01 | 03:03 | 35:01  | 08:03                | 06:01 | 0.02 | 572  |
| 02:01 | 03:03 | 35:01  | 09:01                | 03:03 | 0.09 | 130  |
| 02:01 | 03:03 | 35:01  | 11:01                | 03:01 | 0.02 | 572  |
| 02:01 | 03:03 | 35:01  | 12:01                | 03:01 | 0.01 | 1036 |
| 02:01 | 03:03 | 35:01  | 12:02                | 03:01 | 0.01 | 1036 |
| 02:01 | 03:03 | 35:01  | 15:01                | 03:03 | 0.01 | 1036 |
| 02:01 | 03:03 | 35:01  | 15:01                | 06:02 | 0.10 | 115  |
| 02:01 | 03:03 | 39:01  | 09:01                | 03:03 | 0.01 | 1036 |
| 02:01 | 03:03 | 39:01  | 15:01                | 06:02 | 0.02 | 572  |
| 02:01 | 03:03 | 39:05  | 08:03                | 06:01 | 0.01 | 1036 |
| 02:01 | 03:03 | 40:01  | 04:05                | 04:01 | 0.01 | 1036 |
| 02:01 | 03:03 | 40:01  | 09:01                | 03:03 | 0.01 | 1036 |
| 02:01 | 03:03 | 40:02  | 08:03                | 06:01 | 0.01 | 1036 |
| 02:01 | 03:03 | 40:02  | 09:01                | 03:03 | 0.05 | 286  |
| 02:01 | 03:03 | 40:02  | 11:01                | 03:01 | 0.01 | 1036 |
| 02:01 | 03:03 | 40:02  | 15:01                | 06:02 | 0.07 | 177  |
| 02:01 | 03:03 | 40:06  | 09:01                | 03:03 | 0.01 | 1036 |
| 02:01 | 03:03 | 48:01  | 14:54                | 05:03 | 0.02 | 572  |
| 02:01 | 03:03 | 55:02  | 08:03                | 06:01 | 0.01 | 1036 |
| 02:01 | 03:03 | 55:02  | 11:01                | 03:01 | 0.01 | 1036 |
| 02:01 | 03:03 | 55:04  | 09:01                | 03:03 | 0.01 | 1036 |
| 02:01 | 03:04 | 13:01  | 04:04                | 03:02 | 0.01 | 1036 |
| 02:01 | 03:04 | 13:01  | 04:05                | 04:01 | 0.02 | 572  |
| 02:01 | 03:04 | 13:01  | 07:01                | 02:02 | 0.01 | 1036 |
| 02:01 | 03:04 | 13:01  | 09:01                | 03:03 | 0.08 | 151  |
| 02:01 | 03:04 | 13:01  | 11:01                | 03:01 | 0.01 | 1036 |
| 02:01 | 03:04 | 13:01  | 11:01                | 03:02 | 0.01 | 1036 |
| 02:01 | 03:04 | 13:01  | 12:01                | 03:01 | 0.01 | 1036 |
| 02:01 | 03:04 | 13:01  | 12:02                | 03:01 | 0.60 | 9    |
| 02:01 | 03:04 | 13:01  | 14:05                | 05:03 | 0.01 | 1036 |
| 02:01 | 03:04 | 13:01  | 14:07                | 05:03 | 0.02 | 572  |
| 02:01 | 03:04 | 13:01  | 14:54                | 05:02 | 0.01 | 1036 |
| 02:01 | 03:04 | 13:01  | 15:01                | 06:01 | 0.03 | 409  |
| 02:01 | 03:04 | 13:01  | 15:01                | 06:02 | 0.06 | 218  |
| 02:01 | 03:04 | 13:01  | 15:01                | 06:10 | 0.01 | 1036 |
| 02:01 | 03:04 | 13:01  | 15:02                | 06:02 | 0.01 | 1036 |
| 02:01 | 03:04 | 13:01  | 16:02                | 05:02 | 0.01 | 1036 |
| 02:01 | 03:04 | 35:01  | 09:01                | 03:03 | 0.01 | 1036 |
| 02:01 | 03:04 | 39:01  | 09:01                | 03:03 | 0.01 | 1036 |
| 02:01 | 03:04 | 40:01  | 04:04                | 03:02 | 0.02 | 572  |

|       |       |           |           |       |      |      |
|-------|-------|-----------|-----------|-------|------|------|
| 02:01 | 03:04 | 40:01     | 04:05     | 04:01 | 0.06 | 218  |
| 02:01 | 03:04 | 40:01     | 04:06     | 03:02 | 0.02 | 572  |
| 02:01 | 03:04 | 40:01     | 07:01     | 02:02 | 0.01 | 1036 |
| 02:01 | 03:04 | 40:01     | 07:01     | 03:03 | 0.01 | 1036 |
| 02:01 | 03:04 | 40:01     | 08:03     | 06:01 | 0.03 | 409  |
| 02:01 | 03:04 | 40:01     | 09:01     | 03:03 | 0.12 | 97   |
| 02:01 | 03:04 | 40:01     | 11:01     | 03:01 | 0.10 | 115  |
| 02:01 | 03:04 | 40:01     | 11:01     | 04:02 | 0.01 | 1036 |
| 02:01 | 03:04 | 40:01     | 12:01     | 03:01 | 0.05 | 286  |
| 02:01 | 03:04 | 40:01     | 14:03     | 03:01 | 0.01 | 1036 |
| 02:01 | 03:04 | 40:01     | 14:54     | 05:02 | 0.01 | 1036 |
| 02:01 | 03:04 | 40:01     | 15:01     | 06:01 | 0.02 | 572  |
| 02:01 | 03:04 | 40:01     | 15:01     | 06:02 | 0.08 | 151  |
| 02:01 | 03:04 | 40:01     | 15:02     | 06:01 | 0.01 | 1036 |
| 02:01 | 03:04 | 40:01     | 16:02     | 05:02 | 0.02 | 572  |
| 02:01 | 03:04 | 40:02     | 04:05     | 04:01 | 0.02 | 572  |
| 02:01 | 03:04 | 40:02     | 04:06     | 03:02 | 0.01 | 1036 |
| 02:01 | 03:04 | 40:02     | 08:03     | 06:01 | 0.01 | 1036 |
| 02:01 | 03:04 | 40:02     | 09:01     | 03:03 | 0.03 | 409  |
| 02:01 | 03:04 | 40:02     | 11:01     | 03:01 | 0.06 | 218  |
| 02:01 | 03:04 | 40:02     | 14:05     | 05:03 | 0.01 | 1036 |
| 02:01 | 03:04 | 40:02     | 14:54     | 05:03 | 0.01 | 1036 |
| 02:01 | 03:04 | 40:02     | 15:01     | 05:03 | 0.01 | 1036 |
| 02:01 | 03:04 | 40:02     | 16:02     | 05:02 | 0.01 | 1036 |
| 02:01 | 03:04 | 40:03     | 07:01     | 03:03 | 0.01 | 1036 |
| 02:01 | 03:04 | 40:03     | 08:03     | 06:01 | 0.01 | 1036 |
| 02:01 | 03:04 | 40:03     | 09:01     | 03:03 | 0.03 | 409  |
| 02:01 | 03:04 | 40:03     | 14:05     | 05:03 | 0.01 | 1036 |
| 02:01 | 03:04 | 40:03     | 15:01     | 06:02 | 0.02 | 572  |
| 02:01 | 03:04 | 40:06     | 09:01     | 03:03 | 0.02 | 572  |
| 02:01 | 03:04 | 40:06     | 12:02     | 03:01 | 0.02 | 572  |
| 02:01 | 03:04 | 40:06     | 12:01:01G | 03:01 | 0.01 | 1036 |
| 02:01 | 03:04 | 40:40:01G | 04:05     | 04:01 | 0.01 | 1036 |
| 02:01 | 03:04 | 40:40:01G | 12:01     | 03:01 | 0.01 | 1036 |
| 02:01 | 03:04 | 40:40:01G | 15:01     | 06:02 | 0.02 | 572  |
| 02:01 | 03:56 | 48:01     | 12:01     | 03:01 | 0.01 | 1036 |
| 02:01 | 04:01 | 07:06     | 12:02     | 03:01 | 0.01 | 1036 |
| 02:01 | 04:01 | 15:01     | 04:06     | 03:02 | 0.05 | 286  |
| 02:01 | 04:01 | 15:01     | 08:03     | 06:01 | 0.01 | 1036 |
| 02:01 | 04:01 | 15:01     | 11:01     | 03:01 | 0.10 | 115  |
| 02:01 | 04:01 | 15:01     | 14:54     | 05:02 | 0.01 | 1036 |
| 02:01 | 04:01 | 15:01     | 15:01     | 03:01 | 0.01 | 1036 |
| 02:01 | 04:01 | 15:27     | 04:06     | 03:02 | 0.02 | 572  |
| 02:01 | 04:01 | 15:27     | 09:01     | 03:03 | 0.01 | 1036 |
| 02:01 | 04:01 | 15:27     | 11:01     | 03:01 | 0.01 | 1036 |
| 02:01 | 04:01 | 15:27     | 12:02     | 03:01 | 0.01 | 1036 |
| 02:01 | 04:01 | 35:01     | 09:01     | 03:03 | 0.02 | 572  |
| 02:01 | 04:01 | 35:01     | 12:01     | 03:01 | 0.01 | 1036 |
| 02:01 | 04:01 | 35:01     | 12:02     | 03:01 | 0.01 | 1036 |
| 02:01 | 04:01 | 35:03     | 07:01     | 03:03 | 0.01 | 1036 |
| 02:01 | 04:01 | 35:03     | 11:01     | 03:01 | 0.01 | 1036 |
| 02:01 | 04:01 | 35:05     | 13:12     | 03:01 | 0.01 | 1036 |
| 02:01 | 04:03 | 15:25     | 14:04     | 05:03 | 0.01 | 1036 |
| 02:01 | 05:01 | 44:02     | 04:01     | 03:01 | 0.02 | 572  |
| 02:01 | 04:82 | 40:01     | 04:03     | 03:02 | 0.01 | 1036 |
| 02:01 | 04:82 | 48:01     | 04:04     | 03:02 | 0.01 | 1036 |
| 02:01 | 04:82 | 48:01     | 09:01     | 03:03 | 0.02 | 572  |
| 02:01 | 04:82 | 48:01     | 15:01     | 06:02 | 0.01 | 1036 |
| 02:01 | 04:82 | 48:01     | 12:01:01G | 03:01 | 0.01 | 1036 |
| 02:01 | 06:02 | 13:02     | 07:01     | 02:02 | 0.21 | 44   |
| 02:01 | 06:02 | 13:02     | 09:01     | 03:03 | 0.02 | 572  |
| 02:01 | 06:02 | 37:01     | 04:03     | 03:02 | 0.02 | 572  |
| 02:01 | 06:02 | 37:01     | 10:01     | 05:01 | 0.05 | 286  |

|       |       |       |       |       |      |      |
|-------|-------|-------|-------|-------|------|------|
| 02:01 | 06:02 | 40:06 | 09:01 | 03:03 | 0.01 | 1036 |
| 02:01 | 06:02 | 50:01 | 03:01 | 02:01 | 0.01 | 1036 |
| 02:01 | 06:02 | 50:01 | 16:02 | 05:02 | 0.01 | 1036 |
| 02:01 | 06:02 | 57:01 | 04:03 | 03:02 | 0.01 | 1036 |
| 02:01 | 06:02 | 57:01 | 07:01 | 02:02 | 0.01 | 1036 |
| 02:01 | 06:02 | 57:01 | 07:01 | 03:03 | 0.08 | 151  |
| 02:01 | 07:01 | 49:01 | 13:02 | 06:04 | 0.01 | 1036 |
| 02:01 | 07:01 | 49:01 | 15:01 | 06:02 | 0.01 | 1036 |
| 02:01 | 07:02 | 07:02 | 01:01 | 05:01 | 0.02 | 572  |
| 02:01 | 07:02 | 07:02 | 07:01 | 03:03 | 0.01 | 1036 |
| 02:01 | 07:02 | 07:02 | 08:03 | 06:01 | 0.02 | 572  |
| 02:01 | 07:02 | 07:02 | 09:01 | 03:03 | 0.01 | 1036 |
| 02:01 | 07:02 | 07:02 | 10:01 | 05:01 | 0.01 | 1036 |
| 02:01 | 07:02 | 07:02 | 13:02 | 06:09 | 0.01 | 1036 |
| 02:01 | 07:02 | 07:02 | 15:01 | 06:02 | 0.05 | 286  |
| 02:01 | 07:02 | 07:02 | 15:02 | 06:01 | 0.02 | 572  |
| 02:01 | 07:02 | 08:01 | 03:01 | 02:01 | 0.03 | 409  |
| 02:01 | 07:02 | 13:02 | 07:01 | 02:02 | 0.02 | 572  |
| 02:01 | 07:02 | 15:01 | 04:05 | 04:01 | 0.01 | 1036 |
| 02:01 | 07:02 | 15:01 | 04:06 | 03:02 | 0.01 | 1036 |
| 02:01 | 07:02 | 15:01 | 07:01 | 02:02 | 0.01 | 1036 |
| 02:01 | 07:02 | 15:01 | 09:01 | 03:03 | 0.03 | 409  |
| 02:01 | 07:02 | 15:01 | 12:02 | 03:01 | 0.03 | 409  |
| 02:01 | 07:02 | 15:01 | 13:02 | 06:04 | 0.01 | 1036 |
| 02:01 | 07:02 | 15:01 | 15:01 | 06:01 | 0.01 | 1036 |
| 02:01 | 07:02 | 15:01 | 15:01 | 06:02 | 0.01 | 1036 |
| 02:01 | 07:02 | 15:25 | 11:01 | 03:01 | 0.01 | 1036 |
| 02:01 | 07:02 | 35:01 | 15:01 | 06:01 | 0.01 | 1036 |
| 02:01 | 07:02 | 38:02 | 08:03 | 03:01 | 0.03 | 409  |
| 02:01 | 07:02 | 38:02 | 11:01 | 03:01 | 0.02 | 572  |
| 02:01 | 07:02 | 38:02 | 12:02 | 03:01 | 0.01 | 1036 |
| 02:01 | 07:02 | 38:02 | 14:54 | 04:01 | 0.01 | 1036 |
| 02:01 | 07:02 | 38:02 | 15:01 | 05:02 | 0.01 | 1036 |
| 02:01 | 07:02 | 38:02 | 15:01 | 06:02 | 0.01 | 1036 |
| 02:01 | 07:02 | 38:02 | 15:02 | 05:01 | 0.01 | 1036 |
| 02:01 | 07:02 | 38:02 | 16:02 | 05:02 | 0.01 | 1036 |
| 02:01 | 07:02 | 39:01 | 04:04 | 03:02 | 0.02 | 572  |
| 02:01 | 07:02 | 39:01 | 04:05 | 04:01 | 0.02 | 572  |
| 02:01 | 07:02 | 39:01 | 08:03 | 06:01 | 0.09 | 130  |
| 02:01 | 07:02 | 39:01 | 09:01 | 03:03 | 0.02 | 572  |
| 02:01 | 07:02 | 39:01 | 14:05 | 05:03 | 0.01 | 1036 |
| 02:01 | 07:02 | 39:05 | 08:03 | 06:01 | 0.01 | 1036 |
| 02:01 | 07:02 | 39:05 | 14:05 | 05:03 | 0.01 | 1036 |
| 02:01 | 07:02 | 40:01 | 04:05 | 04:01 | 0.06 | 218  |
| 02:01 | 07:02 | 40:01 | 04:06 | 03:02 | 0.03 | 409  |
| 02:01 | 07:02 | 40:01 | 08:03 | 05:03 | 0.01 | 1036 |
| 02:01 | 07:02 | 40:01 | 08:03 | 06:01 | 0.06 | 218  |
| 02:01 | 07:02 | 40:01 | 08:09 | 04:02 | 0.02 | 572  |
| 02:01 | 07:02 | 40:01 | 09:01 | 03:03 | 0.12 | 97   |
| 02:01 | 07:02 | 40:01 | 11:01 | 03:01 | 0.02 | 572  |
| 02:01 | 07:02 | 40:01 | 12:01 | 03:01 | 0.02 | 572  |
| 02:01 | 07:02 | 40:01 | 12:02 | 03:01 | 0.03 | 409  |
| 02:01 | 07:02 | 40:01 | 13:01 | 06:03 | 0.01 | 1036 |
| 02:01 | 07:02 | 40:01 | 14:05 | 05:03 | 0.01 | 1036 |
| 02:01 | 07:02 | 40:01 | 14:54 | 05:02 | 0.02 | 572  |
| 02:01 | 07:02 | 40:01 | 14:54 | 05:03 | 0.01 | 1036 |
| 02:01 | 07:02 | 40:01 | 16:02 | 05:02 | 0.01 | 1036 |
| 02:01 | 07:02 | 40:06 | 09:01 | 03:03 | 0.01 | 1036 |
| 02:01 | 07:02 | 51:02 | 08:02 | 04:02 | 0.01 | 1036 |
| 02:01 | 07:02 | 52:01 | 11:01 | 03:01 | 0.01 | 1036 |
| 02:01 | 07:02 | 55:02 | 08:03 | 06:01 | 0.06 | 218  |
| 02:01 | 07:02 | 56:01 | 08:03 | 06:01 | 0.01 | 1036 |
| 02:01 | 07:02 | 56:01 | 11:01 | 03:01 | 0.01 | 1036 |

|       |       |        |                      |       |      |      |
|-------|-------|--------|----------------------|-------|------|------|
| 02:01 | 07:02 | 56:01  | 14:54                | 05:02 | 0.01 | 1036 |
| 02:01 | 07:02 | 58:01  | 03:01                | 02:01 | 0.01 | 1036 |
| 02:01 | 07:02 | 67:01  | 04:03                | 03:02 | 0.02 | 572  |
| 02:01 | 07:02 | 67:01  | 07:01                | 03:01 | 0.01 | 1036 |
| 02:01 | 07:02 | 67:01  | 08:03                | 06:01 | 0.03 | 409  |
| 02:01 | 07:02 | 67:01  | 11:01                | 03:01 | 0.02 | 572  |
| 02:01 | 07:02 | 67:01  | 14:05                | 05:03 | 0.02 | 572  |
| 02:01 | 07:02 | 67:01  | 15:01                | 06:02 | 0.08 | 151  |
| 02:01 | 07:02 | 67:01  | 16:02                | 05:02 | 0.03 | 409  |
| 02:01 | 07:02 | 67:01  | 12:01(6)<br>12:10(6) | 03:01 | 0.14 | 76   |
| 02:01 | 07:04 | 15:01  | 14:03                | 03:01 | 0.01 | 1036 |
| 02:01 | 07:04 | 15:18  | 01:01                | 05:01 | 0.01 | 1036 |
| 02:01 | 07:04 | 15:18  | 04:01                | 03:01 | 0.09 | 130  |
| 02:01 | 07:04 | 15:18  | 04:01                | 03:02 | 0.02 | 572  |
| 02:01 | 07:04 | 15:18  | 04:03                | 03:02 | 0.01 | 1036 |
| 02:01 | 07:04 | 15:18  | 04:05                | 04:01 | 0.01 | 1036 |
| 02:01 | 07:04 | 15:18  | 08:03                | 06:01 | 0.01 | 1036 |
| 02:01 | 07:04 | 15:18  | 12:01                | 03:01 | 0.01 | 1036 |
| 02:01 | 07:04 | 15:18  | 12:02                | 03:01 | 0.01 | 1036 |
| 02:01 | 07:04 | 15:18  | 14:06                | 03:01 | 0.01 | 1036 |
| 02:01 | 07:04 | 15:18  | 15:01                | 06:02 | 0.03 | 409  |
| 02:01 | 07:04 | 15:198 | 15:01                | 06:02 | 0.01 | 1036 |
| 02:01 | 07:04 | 44:02  | 11:01                | 03:01 | 0.01 | 1036 |
| 02:01 | 07:04 | 44:02  | 15:01                | 06:02 | 0.01 | 1036 |
| 02:01 | 07:04 | 46:01  | 08:03                | 06:01 | 0.02 | 572  |
| 02:01 | 07:04 | 46:01  | 12:01                | 03:01 | 0.01 | 1036 |
| 02:01 | 07:04 | 51:01  | 03:01                | 02:01 | 0.01 | 1036 |
| 02:01 | 07:04 | 51:01  | 09:01                | 03:03 | 0.01 | 1036 |
| 02:01 | 08:01 | 13:01  | 12:02                | 03:01 | 0.02 | 572  |
| 02:01 | 08:01 | 15:01  | 04:05                | 04:01 | 0.02 | 572  |
| 02:01 | 08:01 | 15:01  | 08:03                | 06:01 | 0.02 | 572  |
| 02:01 | 08:01 | 15:01  | 09:01                | 03:03 | 0.02 | 572  |
| 02:01 | 08:01 | 15:01  | 11:01                | 03:01 | 0.02 | 572  |
| 02:01 | 08:01 | 15:01  | 15:01                | 06:02 | 0.09 | 130  |
| 02:01 | 08:01 | 15:02  | 01:01                | 05:01 | 0.01 | 1036 |
| 02:01 | 08:01 | 15:02  | 12:02                | 03:01 | 0.10 | 115  |
| 02:01 | 08:01 | 15:02  | 13:12                | 03:01 | 0.01 | 1036 |
| 02:01 | 08:01 | 15:18  | 04:03                | 03:02 | 0.03 | 409  |
| 02:01 | 08:01 | 15:18  | 04:04                | 03:02 | 0.01 | 1036 |
| 02:01 | 08:01 | 15:18  | 04:05                | 04:01 | 0.05 | 286  |
| 02:01 | 08:01 | 15:18  | 07:01                | 02:02 | 0.01 | 1036 |
| 02:01 | 08:01 | 15:18  | 08:02                | 03:01 | 0.01 | 1036 |
| 02:01 | 08:01 | 15:18  | 08:03                | 06:01 | 0.01 | 1036 |
| 02:01 | 08:01 | 15:18  | 09:01                | 03:03 | 0.05 | 286  |
| 02:01 | 08:01 | 15:18  | 11:01                | 03:02 | 0.01 | 1036 |
| 02:01 | 08:01 | 15:18  | 12:10                | 03:01 | 0.01 | 1036 |
| 02:01 | 08:01 | 15:18  | 14:05                | 05:03 | 0.01 | 1036 |
| 02:01 | 08:01 | 15:18  | 15:01                | 06:02 | 0.05 | 286  |
| 02:01 | 08:01 | 35:01  | 09:01                | 03:03 | 0.02 | 572  |
| 02:01 | 08:01 | 35:01  | 12:02                | 03:01 | 0.01 | 1036 |
| 02:01 | 08:01 | 35:01  | 15:01                | 06:02 | 0.01 | 1036 |
| 02:01 | 08:01 | 39:01  | 12:02                | 03:01 | 0.01 | 1036 |
| 02:01 | 08:01 | 40:01  | 12:01                | 03:01 | 0.01 | 1036 |
| 02:01 | 08:01 | 40:06  | 04:01                | 03:01 | 0.01 | 1036 |
| 02:01 | 08:01 | 40:06  | 04:03                | 03:02 | 0.01 | 1036 |
| 02:01 | 08:01 | 40:06  | 09:01                | 03:02 | 0.01 | 1036 |
| 02:01 | 08:01 | 46:01  | 09:01                | 03:03 | 0.01 | 1036 |
| 02:01 | 08:01 | 48:01  | 04:05                | 04:01 | 0.01 | 1036 |
| 02:01 | 08:01 | 48:01  | 09:01                | 03:03 | 0.02 | 572  |
| 02:01 | 08:01 | 48:01  | 12:01                | 03:01 | 0.01 | 1036 |
| 02:01 | 08:01 | 52:01  | 04:05                | 04:01 | 0.01 | 1036 |
| 02:01 | 08:01 | 54:01  | 04:05                | 04:01 | 0.01 | 1036 |

|       |       |       |                          |       |      |      |
|-------|-------|-------|--------------------------|-------|------|------|
| 02:01 | 08:03 | 40:02 | 08:03                    | 06:01 | 0.01 | 1036 |
| 02:01 | 08:03 | 48:01 | 08:02                    | 04:02 | 0.01 | 1036 |
| 02:01 | 08:03 | 48:01 | 09:01                    | 03:03 | 0.02 | 572  |
| 02:01 | 08:03 | 48:01 | 11:01                    | 03:01 | 0.01 | 1036 |
| 02:01 | 08:03 | 48:01 | 14:54                    | 05:02 | 0.02 | 572  |
| 02:01 | 08:03 | 48:01 | 15:01                    | 03:01 | 0.01 | 1036 |
| 02:01 | 08:03 | 48:01 | 12:01:01G(1)<br>12:01(1) | 03:01 | 0.03 | 409  |
| 02:01 | 07:63 | 51:01 | 12:10(1)<br>14:54        | 03:02 | 0.01 | 1036 |
| 02:01 | 07:66 | 40:01 | 08:03                    | 06:01 | 0.01 | 1036 |
| 02:01 | 07:66 | 40:01 | 13:02                    | 06:09 | 0.01 | 1036 |
| 02:01 | 08:22 | 40:06 | 04:05                    | 04:01 | 0.02 | 572  |
| 02:01 | 08:22 | 40:06 | 04:06                    | 03:02 | 0.01 | 1036 |
| 02:01 | 08:22 | 40:06 | 11:01                    | 03:01 | 0.01 | 1036 |
| 02:01 | 08:22 | 40:06 | 13:02                    | 06:04 | 0.01 | 1036 |
| 02:01 | 08:22 | 40:06 | 14:05                    | 05:03 | 0.01 | 1036 |
| 02:01 | 08:22 | 48:01 | 14:03                    | 03:01 | 0.01 | 1036 |
| 02:01 | 08:22 | 81:02 | 15:01                    | 06:02 | 0.07 | 177  |
| 02:01 | 12:02 | 27:04 | 08:03                    | 06:01 | 0.01 | 1036 |
| 02:01 | 12:02 | 27:04 | 12:02                    | 03:01 | 0.06 | 218  |
| 02:01 | 12:02 | 27:04 | 14:05                    | 05:03 | 0.01 | 1036 |
| 02:01 | 12:02 | 27:04 | 14:54                    | 05:03 | 0.01 | 1036 |
| 02:01 | 12:02 | 52:01 | 01:01                    | 05:01 | 0.01 | 1036 |
| 02:01 | 12:02 | 52:01 | 04:03                    | 03:02 | 0.01 | 1036 |
| 02:01 | 12:02 | 52:01 | 10:01                    | 05:01 | 0.02 | 572  |
| 02:01 | 12:02 | 52:01 | 14:04                    | 05:03 | 0.02 | 572  |
| 02:01 | 12:02 | 52:01 | 14:11                    | 05:03 | 0.01 | 1036 |
| 02:01 | 12:02 | 52:01 | 15:02                    | 06:01 | 0.09 | 130  |
| 02:01 | 12:03 | 35:03 | 07:01                    | 03:03 | 0.01 | 1036 |
| 02:01 | 12:03 | 35:03 | 13:01                    | 06:03 | 0.01 | 1036 |
| 02:01 | 12:03 | 38:01 | 01:01                    | 05:01 | 0.01 | 1036 |
| 02:01 | 12:03 | 55:02 | 11:01                    | 03:01 | 0.01 | 1036 |
| 02:01 | 12:03 | 55:02 | 14:05                    | 05:03 | 0.01 | 1036 |
| 02:01 | 14:02 | 40:01 | 15:01                    | 06:02 | 0.02 | 572  |
| 02:01 | 14:02 | 40:06 | 11:01                    | 03:01 | 0.01 | 1036 |
| 02:01 | 14:02 | 51:01 | 04:01                    | 03:01 | 0.01 | 1036 |
| 02:01 | 14:02 | 51:01 | 04:03                    | 03:02 | 0.02 | 572  |
| 02:01 | 14:02 | 51:01 | 04:03                    | 03:05 | 0.01 | 1036 |
| 02:01 | 14:02 | 51:01 | 04:05                    | 04:01 | 0.07 | 177  |
| 02:01 | 14:02 | 51:01 | 04:06                    | 03:02 | 0.03 | 409  |
| 02:01 | 14:02 | 51:01 | 07:01                    | 02:02 | 0.02 | 572  |
| 02:01 | 14:02 | 51:01 | 08:03                    | 06:01 | 0.06 | 218  |
| 02:01 | 14:02 | 51:01 | 09:01                    | 03:03 | 0.17 | 54   |
| 02:01 | 14:02 | 51:01 | 10:01                    | 05:01 | 0.02 | 572  |
| 02:01 | 14:02 | 51:01 | 11:01                    | 03:01 | 0.02 | 572  |
| 02:01 | 14:02 | 51:01 | 11:01                    | 03:13 | 0.01 | 1036 |
| 02:01 | 14:02 | 51:01 | 12:01                    | 03:01 | 0.05 | 286  |
| 02:01 | 14:02 | 51:01 | 12:01                    | 03:03 | 0.01 | 1036 |
| 02:01 | 14:02 | 51:01 | 12:02                    | 03:01 | 0.01 | 1036 |
| 02:01 | 14:02 | 51:01 | 13:02                    | 06:04 | 0.01 | 1036 |
| 02:01 | 14:02 | 51:01 | 14:02                    | 03:01 | 0.01 | 1036 |
| 02:01 | 14:02 | 51:01 | 14:03                    | 03:01 | 0.06 | 218  |
| 02:01 | 14:02 | 51:01 | 14:54                    | 05:02 | 0.01 | 1036 |
| 02:01 | 14:02 | 51:01 | 15:01                    | 05:03 | 0.03 | 409  |
| 02:01 | 14:02 | 51:01 | 15:01                    | 06:02 | 0.10 | 115  |
| 02:01 | 14:02 | 51:01 | 16:02                    | 05:02 | 0.06 | 218  |
| 02:01 | 14:03 | 44:03 | 13:02                    | 06:04 | 0.03 | 409  |
| 02:01 | 15:02 | 13:02 | 07:01                    | 02:02 | 0.01 | 1036 |
| 02:01 | 15:02 | 27:04 | 15:01                    | 06:02 | 0.01 | 1036 |
| 02:01 | 15:02 | 35:01 | 08:03                    | 06:01 | 0.01 | 1036 |
| 02:01 | 15:02 | 35:01 | 15:01                    | 06:02 | 0.01 | 1036 |
| 02:01 | 15:02 | 35:03 | 04:01                    | 03:02 | 0.01 | 1036 |



|       |              |       |              |       |      |             |
|-------|--------------|-------|--------------|-------|------|-------------|
| 02:01 | 15:02        | 40:01 | 03:01        | 02:01 | 0.01 | <b>1036</b> |
| 02:01 | 15:02        | 40:01 | 08:03        | 06:01 | 0.02 | <b>572</b>  |
| 02:01 | 15:02        | 40:01 | 09:01        | 03:03 | 0.07 | <b>177</b>  |
| 02:01 | 15:02        | 40:01 | 10:01        | 05:01 | 0.01 | <b>1036</b> |
| 02:01 | 15:02        | 40:01 | 11:01        | 03:01 | 0.06 | <b>218</b>  |
| 02:01 | 15:02        | 40:01 | 12:02        | 03:01 | 0.02 | <b>572</b>  |
| 02:01 | 15:02        | 40:01 | 14:05        | 05:03 | 0.01 | <b>1036</b> |
| 02:01 | 15:02        | 40:01 | 14:54        | 05:03 | 0.01 | <b>1036</b> |
| 02:01 | 15:02        | 40:01 | 15:01        | 06:02 | 0.05 | <b>286</b>  |
| 02:01 | 15:02        | 40:01 | 12:01:01G    | 03:01 | 0.01 | <b>1036</b> |
| 02:01 | 15:02        | 40:02 | 04:05        | 04:01 | 0.01 | <b>1036</b> |
| 02:01 | 15:02        | 40:02 | 12:02        | 03:01 | 0.02 | <b>572</b>  |
| 02:01 | 15:02        | 40:02 | 15:01        | 06:02 | 0.05 | <b>286</b>  |
| 02:01 | 15:02        | 40:06 | 15:02        | 06:01 | 0.01 | <b>1036</b> |
| 02:01 | 15:02        | 51:01 | 03:01        | 02:01 | 0.01 | <b>1036</b> |
| 02:01 | 15:02        | 51:01 | 04:01        | 03:01 | 0.02 | <b>572</b>  |
| 02:01 | 15:02        | 51:01 | 04:02        | 03:02 | 0.01 | <b>1036</b> |
| 02:01 | 15:02        | 51:01 | 04:03        | 03:02 | 0.01 | <b>1036</b> |
| 02:01 | 15:02        | 51:01 | 04:04        | 03:02 | 0.01 | <b>1036</b> |
| 02:01 | 15:02        | 51:01 | 04:05        | 03:03 | 0.01 | <b>1036</b> |
| 02:01 | 15:02        | 51:01 | 07:01        | 03:03 | 0.01 | <b>1036</b> |
| 02:01 | 15:02        | 51:01 | 08:03        | 06:01 | 0.02 | <b>572</b>  |
| 02:01 | 15:02        | 51:01 | 09:01        | 03:03 | 0.01 | <b>1036</b> |
| 02:01 | 15:02        | 51:01 | 11:01        | 03:01 | 0.02 | <b>572</b>  |
| 02:01 | 15:02        | 51:01 | 11:01        | 03:13 | 0.01 | <b>1036</b> |
| 02:01 | 15:02        | 51:01 | 12:02        | 03:01 | 0.01 | <b>1036</b> |
| 02:01 | 15:02        | 51:01 | 14:03        | 03:01 | 0.01 | <b>1036</b> |
| 02:01 | 15:02        | 51:01 | 14:12        | 03:01 | 0.01 | <b>1036</b> |
| 02:01 | 15:02        | 51:01 | 14:54        | 05:02 | 0.03 | <b>409</b>  |
| 02:01 | 15:02        | 51:01 | 16:02        | 05:02 | 0.01 | <b>1036</b> |
| 02:01 | 15:02        | 51:02 | 08:02        | 04:02 | 0.03 | <b>409</b>  |
| 02:01 | 15:02        | 51:02 | 08:03        | 06:01 | 0.01 | <b>1036</b> |
| 02:01 | 15:02        | 51:02 | 09:01        | 03:03 | 0.03 | <b>409</b>  |
| 02:01 | 15:02        | 51:02 | 13:07        | 03:01 | 0.01 | <b>1036</b> |
| 02:01 | 15:02        | 51:02 | 15:01        | 06:02 | 0.01 | <b>1036</b> |
| 02:01 | 15:02        | 55:02 | 12:02        | 03:01 | 0.01 | <b>1036</b> |
| 02:01 | 15:05        | 07:05 | 12:01        | 03:01 | 0.01 | <b>1036</b> |
| 02:01 | 07:595       | 39:01 | 11:01        | 03:01 | 0.01 | <b>1036</b> |
| 02:01 | 17:01        | 41:01 | 01:02        | 05:01 | 0.01 | <b>1036</b> |
| 02:01 | 04:01:01G    | 15:01 | 09:01        | 03:03 | 0.01 | <b>1036</b> |
| 02:01 | 04:01:01G    | 35:01 | 03:01        | 03:01 | 0.01 | <b>1036</b> |
| 02:01 | 04:01:01G    | 53:01 | 13:02        | 06:09 | 0.01 | <b>1036</b> |
| 02:01 | 07:01:01G(1) | 44:03 | 07:01        | 02:02 | 0.02 | <b>572</b>  |
| 02:01 | 07:06(1)     |       |              |       |      |             |
| 02:01 | 08:01(1)     | 48:01 | 14:05        | 05:03 | 0.05 | <b>286</b>  |
| 02:01 | 08:22(3)     |       |              |       |      |             |
| 02:01 | 08:01(11)    | 40:06 | 09:01        | 03:03 | 0.23 | <b>37</b>   |
| 02:01 | 08:22(9)     |       |              |       |      |             |
| 02:01 | 08:01(2)     | 40:06 | 12:01:01G(1) | 03:01 | 0.03 | <b>409</b>  |
| 02:01 | 08:22(1)     |       | 12:01(1)     |       |      |             |
| 02:01 | 08:01(3)     | 48:01 | 11:01        | 03:01 | 0.05 | <b>286</b>  |
| 02:01 | 08:22(1)     |       |              |       |      |             |
| 02:01 | 08:01(3)     | 40:06 | 15:01        | 06:02 | 0.06 | <b>218</b>  |
| 02:01 | 08:22(2)     |       |              |       |      |             |
| 02:01 | 08:01:01G    | 15:01 | 15:01        | 05:02 | 0.01 | <b>1036</b> |
| 02:01 | 08:01:01G    | 15:02 | 15:01        | 06:01 | 0.01 | <b>1036</b> |
| 02:01 | 08:01:01G    | 15:18 | 14:03        | 03:01 | 0.01 | <b>1036</b> |
| 02:01 | 08:01:01G    | 48:03 | 15:01        | 06:10 | 0.01 | <b>1036</b> |
| 02:01 | 08:01:01G(1) | 40:06 | 08:03        | 06:01 | 0.02 | <b>572</b>  |
| 02:01 | 08:01(1)     |       |              |       |      |             |
| 02:01 | 08:01:01G(1) | 40:06 | 14:03        | 03:01 | 0.03 | <b>409</b>  |
| 02:01 | 08:22(2)     |       |              |       |      |             |
| 02:02 | 17:01        | 41:01 | 07:01        | 02:02 | 0.01 | <b>1036</b> |

|       |       |       |           |       |      |      |
|-------|-------|-------|-----------|-------|------|------|
| 02:03 | 01:02 | 35:01 | 15:01     | 06:02 | 0.01 | 1036 |
| 02:03 | 01:02 | 46:01 | 07:01     | 03:03 | 0.01 | 1036 |
| 02:03 | 01:02 | 46:01 | 09:01     | 03:03 | 0.12 | 97   |
| 02:03 | 01:02 | 46:01 | 13:02     | 06:09 | 0.01 | 1036 |
| 02:03 | 01:02 | 46:01 | 14:54     | 05:02 | 0.03 | 409  |
| 02:03 | 01:02 | 46:01 | 12:01:01G | 03:01 | 0.01 | 1036 |
| 02:03 | 01:02 | 46:01 | 12:01:01G | 03:03 | 0.01 | 1036 |
| 02:03 | 01:02 | 54:01 | 11:01     | 03:01 | 0.01 | 1036 |
| 02:03 | 01:02 | 54:01 | 14:05     | 05:03 | 0.01 | 1036 |
| 02:03 | 01:02 | 55:02 | 08:03     | 06:01 | 0.01 | 1036 |
| 02:03 | 01:02 | 55:02 | 09:01     | 03:03 | 0.01 | 1036 |
| 02:03 | 01:02 | 55:02 | 14:05     | 05:03 | 0.01 | 1036 |
| 02:03 | 01:02 | 55:02 | 16:02     | 05:02 | 0.01 | 1036 |
| 02:03 | 01:02 | 55:02 | 12:01:01G | 03:01 | 0.01 | 1036 |
| 02:03 | 01:02 | 56:01 | 14:25     | 03:01 | 0.01 | 1036 |
| 02:03 | 01:02 | 56:01 | 15:02     | 05:02 | 0.01 | 1036 |
| 02:03 | 01:02 | 56:04 | 15:02     | 05:01 | 0.01 | 1036 |
| 02:03 | 03:03 | 15:11 | 04:05     | 04:01 | 0.01 | 1036 |
| 02:03 | 03:03 | 15:11 | 15:01     | 06:02 | 0.01 | 1036 |
| 02:03 | 03:03 | 35:01 | 15:01     | 06:02 | 0.01 | 1036 |
| 02:03 | 03:03 | 39:01 | 12:02     | 03:01 | 0.01 | 1036 |
| 02:03 | 03:03 | 55:02 | 14:54     | 05:02 | 0.01 | 1036 |
| 02:03 | 03:04 | 13:01 | 04:05     | 04:01 | 0.01 | 1036 |
| 02:03 | 03:04 | 13:01 | 09:01     | 03:03 | 0.01 | 1036 |
| 02:03 | 03:04 | 13:01 | 12:02     | 03:01 | 0.02 | 572  |
| 02:03 | 03:04 | 13:01 | 13:02     | 06:09 | 0.01 | 1036 |
| 02:03 | 03:04 | 13:01 | 14:05     | 05:03 | 0.02 | 572  |
| 02:03 | 03:04 | 13:01 | 15:01     | 05:02 | 0.01 | 1036 |
| 02:03 | 03:04 | 13:01 | 15:01     | 06:01 | 0.03 | 409  |
| 02:03 | 03:04 | 13:01 | 15:02     | 05:01 | 0.01 | 1036 |
| 02:03 | 03:04 | 13:01 | 16:02     | 05:02 | 0.01 | 1036 |
| 02:03 | 03:04 | 40:01 | 09:01     | 03:03 | 0.02 | 572  |
| 02:03 | 03:04 | 40:01 | 11:01     | 03:01 | 0.02 | 572  |
| 02:03 | 03:04 | 40:01 | 12:02     | 03:01 | 0.01 | 1036 |
| 02:03 | 03:04 | 40:01 | 15:01     | 06:02 | 0.01 | 1036 |
| 02:03 | 03:04 | 40:01 | 15:01     | 06:10 | 0.01 | 1036 |
| 02:03 | 03:04 | 40:01 | 16:02     | 05:02 | 0.02 | 572  |
| 02:03 | 03:17 | 40:01 | 09:01     | 03:03 | 0.01 | 1036 |
| 02:03 | 04:03 | 15:12 | 15:01     | 06:01 | 0.01 | 1036 |
| 02:03 | 04:03 | 15:12 | 15:02     | 05:02 | 0.08 | 151  |
| 02:03 | 04:03 | 15:19 | 09:01     | 03:03 | 0.01 | 1036 |
| 02:03 | 04:03 | 15:25 | 09:01     | 03:03 | 0.01 | 1036 |
| 02:03 | 04:03 | 15:25 | 15:01     | 05:02 | 0.02 | 572  |
| 02:03 | 04:03 | 39:01 | 11:01     | 03:01 | 0.01 | 1036 |
| 02:03 | 04:03 | 40:01 | 12:02     | 03:01 | 0.02 | 572  |
| 02:03 | 04:03 | 40:01 | 14:54     | 05:03 | 0.01 | 1036 |
| 02:03 | 04:03 | 40:01 | 15:02     | 05:01 | 0.01 | 1036 |
| 02:03 | 04:03 | 40:01 | 16:02     | 05:02 | 0.02 | 572  |
| 02:03 | 04:03 | 55:02 | 16:02     | 05:02 | 0.01 | 1036 |
| 02:03 | 03:69 | 55:02 | 09:01     | 03:03 | 0.01 | 1036 |
| 02:03 | 06:02 | 13:02 | 07:01     | 02:02 | 0.01 | 1036 |
| 02:03 | 06:02 | 37:01 | 10:01     | 05:01 | 0.02 | 572  |
| 02:03 | 07:02 | 07:02 | 01:01     | 05:01 | 0.01 | 1036 |
| 02:03 | 07:02 | 07:02 | 15:01     | 06:02 | 0.01 | 1036 |
| 02:03 | 07:02 | 13:01 | 11:01     | 03:01 | 0.01 | 1036 |
| 02:03 | 07:02 | 38:02 | 03:01     | 02:01 | 0.01 | 1036 |
| 02:03 | 07:02 | 38:02 | 04:03     | 03:02 | 0.07 | 177  |
| 02:03 | 07:02 | 38:02 | 04:05     | 04:01 | 0.02 | 572  |
| 02:03 | 07:02 | 38:02 | 04:06     | 03:02 | 0.01 | 1036 |
| 02:03 | 07:02 | 38:02 | 07:01     | 03:03 | 0.01 | 1036 |
| 02:03 | 07:02 | 38:02 | 08:03     | 06:01 | 0.36 | 22   |
| 02:03 | 07:02 | 38:02 | 08:09     | 04:02 | 0.01 | 1036 |
| 02:03 | 07:02 | 38:02 | 09:01     | 03:03 | 0.05 | 286  |

|       |           |       |       |       |      |             |
|-------|-----------|-------|-------|-------|------|-------------|
| 02:03 | 07:02     | 38:02 | 12:01 | 03:01 | 0.01 | <b>1036</b> |
| 02:03 | 07:02     | 38:02 | 12:02 | 03:01 | 0.05 | <b>286</b>  |
| 02:03 | 07:02     | 38:02 | 13:12 | 03:01 | 0.02 | <b>572</b>  |
| 02:03 | 07:02     | 38:02 | 14:05 | 05:03 | 0.02 | <b>572</b>  |
| 02:03 | 07:02     | 38:02 | 14:54 | 05:02 | 0.01 | <b>1036</b> |
| 02:03 | 07:02     | 38:02 | 15:01 | 05:02 | 0.01 | <b>1036</b> |
| 02:03 | 07:02     | 38:02 | 15:01 | 06:01 | 0.07 | <b>177</b>  |
| 02:03 | 07:02     | 38:02 | 15:01 | 06:02 | 0.01 | <b>1036</b> |
| 02:03 | 07:02     | 38:02 | 15:01 | 06:10 | 0.01 | <b>1036</b> |
| 02:03 | 07:02     | 38:02 | 15:02 | 05:01 | 0.15 | <b>64</b>   |
| 02:03 | 07:02     | 38:02 | 15:02 | 05:02 | 0.02 | <b>572</b>  |
| 02:03 | 07:02     | 38:02 | 16:02 | 03:01 | 0.01 | <b>1036</b> |
| 02:03 | 07:02     | 38:02 | 16:02 | 05:02 | 0.31 | <b>26</b>   |
| 02:03 | 07:02     | 39:01 | 11:01 | 03:01 | 0.02 | <b>572</b>  |
| 02:03 | 07:02     | 39:01 | 12:02 | 05:02 | 0.01 | <b>1036</b> |
| 02:03 | 07:02     | 39:01 | 15:01 | 05:02 | 0.01 | <b>1036</b> |
| 02:03 | 07:02     | 39:05 | 08:03 | 06:01 | 0.01 | <b>1036</b> |
| 02:03 | 07:02     | 39:09 | 04:05 | 04:01 | 0.01 | <b>1036</b> |
| 02:03 | 07:02     | 39:09 | 08:03 | 06:01 | 0.01 | <b>1036</b> |
| 02:03 | 07:02     | 39:09 | 10:01 | 05:01 | 0.01 | <b>1036</b> |
| 02:03 | 07:02     | 40:01 | 04:01 | 03:01 | 0.01 | <b>1036</b> |
| 02:03 | 07:02     | 40:01 | 04:05 | 04:01 | 0.01 | <b>1036</b> |
| 02:03 | 07:02     | 40:01 | 08:03 | 06:01 | 0.05 | <b>286</b>  |
| 02:03 | 07:02     | 40:01 | 09:01 | 03:03 | 0.03 | <b>409</b>  |
| 02:03 | 07:02     | 40:01 | 12:02 | 03:01 | 0.01 | <b>1036</b> |
| 02:03 | 07:02     | 40:01 | 14:03 | 03:01 | 0.01 | <b>1036</b> |
| 02:03 | 07:02     | 40:01 | 15:01 | 06:02 | 0.01 | <b>1036</b> |
| 02:03 | 07:02     | 46:01 | 09:01 | 03:03 | 0.01 | <b>1036</b> |
| 02:03 | 07:02     | 52:01 | 14:04 | 05:03 | 0.09 | <b>130</b>  |
| 02:03 | 07:02     | 52:01 | 14:10 | 05:10 | 0.01 | <b>1036</b> |
| 02:03 | 07:02     | 56:01 | 04:05 | 04:01 | 0.01 | <b>1036</b> |
| 02:03 | 07:04     | 18:02 | 15:02 | 05:01 | 0.01 | <b>1036</b> |
| 02:03 | 08:01     | 15:02 | 12:02 | 03:01 | 0.02 | <b>572</b>  |
| 02:03 | 08:01     | 15:02 | 15:01 | 06:01 | 0.01 | <b>1036</b> |
| 02:03 | 08:01     | 15:02 | 15:01 | 06:10 | 0.01 | <b>1036</b> |
| 02:03 | 08:01     | 48:03 | 12:02 | 03:01 | 0.01 | <b>1036</b> |
| 02:03 | 07:66     | 40:01 | 12:02 | 03:01 | 0.01 | <b>1036</b> |
| 02:03 | 08:22     | 40:06 | 09:01 | 03:03 | 0.01 | <b>1036</b> |
| 02:03 | 12:02     | 27:04 | 04:05 | 04:01 | 0.01 | <b>1036</b> |
| 02:03 | 12:02     | 27:04 | 12:02 | 03:01 | 0.01 | <b>1036</b> |
| 02:03 | 12:02     | 27:04 | 14:54 | 05:02 | 0.01 | <b>1036</b> |
| 02:03 | 12:02     | 52:01 | 10:01 | 05:01 | 0.01 | <b>1036</b> |
| 02:03 | 12:03     | 55:02 | 04:04 | 03:02 | 0.01 | <b>1036</b> |
| 02:03 | 12:03     | 55:02 | 04:06 | 03:02 | 0.01 | <b>1036</b> |
| 02:03 | 12:03     | 55:02 | 11:01 | 03:01 | 0.02 | <b>572</b>  |
| 02:03 | 12:03     | 55:02 | 13:12 | 03:01 | 0.01 | <b>1036</b> |
| 02:03 | 12:03     | 55:02 | 14:05 | 05:03 | 0.01 | <b>1036</b> |
| 02:03 | 12:03     | 55:02 | 14:54 | 05:02 | 0.01 | <b>1036</b> |
| 02:03 | 12:03     | 55:02 | 16:02 | 05:02 | 0.03 | <b>409</b>  |
| 02:03 | 14:02     | 51:01 | 12:01 | 03:01 | 0.01 | <b>1036</b> |
| 02:03 | 14:02     | 51:01 | 14:04 | 05:03 | 0.01 | <b>1036</b> |
| 02:03 | 15:02     | 51:01 | 14:05 | 05:03 | 0.01 | <b>1036</b> |
| 02:03 | 08:01:01G | 15:01 | 15:01 | 06:02 | 0.01 | <b>1036</b> |
| 02:05 | 02:02     | 44:05 | 01:01 | 05:01 | 0.01 | <b>1036</b> |
| 02:05 | 06:02     | 50:01 | 03:01 | 02:01 | 0.01 | <b>1036</b> |
| 02:05 | 06:02     | 50:01 | 04:05 | 04:01 | 0.01 | <b>1036</b> |
| 02:05 | 06:02     | 50:01 | 07:01 | 02:02 | 0.03 | <b>409</b>  |
| 02:05 | 06:02     | 50:01 | 11:01 | 03:01 | 0.01 | <b>1036</b> |
| 02:06 | 01:02     | 15:07 | 04:03 | 03:02 | 0.01 | <b>1036</b> |
| 02:06 | 01:02     | 27:05 | 08:03 | 06:01 | 0.01 | <b>1036</b> |
| 02:06 | 01:02     | 46:01 | 04:03 | 03:02 | 0.01 | <b>1036</b> |
| 02:06 | 01:02     | 46:01 | 08:03 | 06:01 | 0.02 | <b>572</b>  |
| 02:06 | 01:02     | 46:01 | 09:01 | 03:03 | 0.08 | <b>151</b>  |

|       |       |           |                          |       |      |      |
|-------|-------|-----------|--------------------------|-------|------|------|
| 02:06 | 01:02 | 46:01     | 11:01                    | 03:01 | 0.01 | 1036 |
| 02:06 | 01:02 | 46:01     | 12:02                    | 03:01 | 0.01 | 1036 |
| 02:06 | 01:02 | 46:01     | 15:01                    | 06:02 | 0.01 | 1036 |
| 02:06 | 01:02 | 46:01     | 12:01:01G(1)<br>12:01(1) | 03:01 | 0.02 | 572  |
| 02:06 | 01:02 | 54:01     | 04:05                    | 03:03 | 0.01 | 1036 |
| 02:06 | 01:02 | 54:01     | 04:05                    | 04:01 | 0.14 | 76   |
| 02:06 | 01:02 | 54:01     | 08:02                    | 04:02 | 0.01 | 1036 |
| 02:06 | 01:02 | 54:01     | 08:03                    | 03:01 | 0.01 | 1036 |
| 02:06 | 01:02 | 54:01     | 08:03                    | 06:01 | 0.03 | 409  |
| 02:06 | 01:02 | 54:01     | 09:01                    | 03:03 | 0.01 | 1036 |
| 02:06 | 01:02 | 54:01     | 13:02                    | 06:04 | 0.01 | 1036 |
| 02:06 | 01:02 | 54:01     | 14:05                    | 05:03 | 0.01 | 1036 |
| 02:06 | 01:02 | 54:01     | 15:01                    | 06:02 | 0.01 | 1036 |
| 02:06 | 01:02 | 54:01     | 15:02                    | 05:01 | 0.01 | 1036 |
| 02:06 | 01:02 | 54:01     | 15:02                    | 06:01 | 0.01 | 1036 |
| 02:06 | 01:02 | 54:01     | 12:01:01G                | 03:01 | 0.01 | 1036 |
| 02:06 | 01:02 | 55:02     | 07:01                    | 02:02 | 0.01 | 1036 |
| 02:06 | 01:02 | 55:02     | 08:03                    | 06:01 | 0.01 | 1036 |
| 02:06 | 01:02 | 55:02     | 09:01                    | 03:03 | 0.05 | 286  |
| 02:06 | 01:02 | 55:02     | 11:01                    | 03:01 | 0.01 | 1036 |
| 02:06 | 01:02 | 55:02     | 14:05                    | 05:03 | 0.01 | 1036 |
| 02:06 | 01:02 | 55:02     | 15:01                    | 06:02 | 0.05 | 286  |
| 02:06 | 01:02 | 59:01     | 12:02                    | 03:01 | 0.01 | 1036 |
| 02:06 | 01:02 | 40:40:01G | 07:01                    | 02:02 | 0.01 | 1036 |
| 02:06 | 01:03 | 46:01     | 09:01                    | 03:03 | 0.05 | 286  |
| 02:06 | 01:03 | 46:01     | 10:01                    | 05:01 | 0.01 | 1036 |
| 02:06 | 01:03 | 46:01     | 11:01                    | 03:01 | 0.01 | 1036 |
| 02:06 | 01:06 | 55:02     | 09:01                    | 03:03 | 0.02 | 572  |
| 02:06 | 02:02 | 27:05     | 04:01                    | 03:01 | 0.01 | 1036 |
| 02:06 | 02:02 | 27:05     | 04:05                    | 04:01 | 0.01 | 1036 |
| 02:06 | 03:02 | 58:01     | 03:01                    | 02:01 | 0.05 | 286  |
| 02:06 | 03:02 | 58:01     | 13:02                    | 06:09 | 0.05 | 286  |
| 02:06 | 03:03 | 15:01     | 04:01                    | 03:02 | 0.01 | 1036 |
| 02:06 | 03:03 | 15:01     | 04:06                    | 03:02 | 0.01 | 1036 |
| 02:06 | 03:03 | 15:01     | 07:01                    | 02:02 | 0.01 | 1036 |
| 02:06 | 03:03 | 15:01     | 11:01                    | 03:01 | 0.01 | 1036 |
| 02:06 | 03:03 | 15:01     | 12:02                    | 03:01 | 0.01 | 1036 |
| 02:06 | 03:03 | 15:01     | 14:05                    | 05:03 | 0.01 | 1036 |
| 02:06 | 03:03 | 15:01     | 15:01                    | 06:02 | 0.05 | 286  |
| 02:06 | 03:03 | 15:07     | 15:01                    | 06:02 | 0.01 | 1036 |
| 02:06 | 03:03 | 15:11     | 04:06                    | 03:02 | 0.03 | 409  |
| 02:06 | 03:03 | 15:11     | 08:03                    | 06:01 | 0.01 | 1036 |
| 02:06 | 03:03 | 15:11     | 09:01                    | 03:03 | 0.03 | 409  |
| 02:06 | 03:03 | 15:11     | 11:01                    | 03:01 | 0.01 | 1036 |
| 02:06 | 03:03 | 15:11     | 12:01                    | 03:01 | 0.01 | 1036 |
| 02:06 | 03:03 | 15:11     | 12:02                    | 03:01 | 0.02 | 572  |
| 02:06 | 03:03 | 15:11     | 14:05                    | 05:03 | 0.01 | 1036 |
| 02:06 | 03:03 | 15:11     | 15:01                    | 06:02 | 0.12 | 97   |
| 02:06 | 03:03 | 15:46     | 09:01                    | 03:03 | 0.01 | 1036 |
| 02:06 | 03:03 | 15:46     | 15:01                    | 06:02 | 0.03 | 409  |
| 02:06 | 03:03 | 35:01     | 04:04                    | 03:02 | 0.01 | 1036 |
| 02:06 | 03:03 | 35:01     | 07:01                    | 02:02 | 0.01 | 1036 |
| 02:06 | 03:03 | 35:01     | 09:01                    | 03:03 | 0.02 | 572  |
| 02:06 | 03:03 | 35:01     | 11:01                    | 03:01 | 0.03 | 409  |
| 02:06 | 03:03 | 35:01     | 12:02                    | 03:01 | 0.01 | 1036 |
| 02:06 | 03:03 | 35:01     | 13:02                    | 06:09 | 0.01 | 1036 |
| 02:06 | 03:03 | 35:01     | 13:50                    | 03:01 | 0.01 | 1036 |
| 02:06 | 03:03 | 35:01     | 14:05                    | 05:03 | 0.01 | 1036 |
| 02:06 | 03:03 | 35:01     | 14:54                    | 05:02 | 0.01 | 1036 |
| 02:06 | 03:03 | 35:01     | 15:01                    | 03:01 | 0.01 | 1036 |
| 02:06 | 03:03 | 35:01     | 15:01                    | 06:02 | 0.07 | 177  |
| 02:06 | 03:03 | 39:01     | 08:03                    | 06:01 | 0.01 | 1036 |

|       |       |           |              |       |      |      |
|-------|-------|-----------|--------------|-------|------|------|
| 02:06 | 03:03 | 40:02     | 03:01        | 02:01 | 0.01 | 1036 |
| 02:06 | 03:03 | 40:02     | 09:01        | 03:03 | 0.01 | 1036 |
| 02:06 | 03:03 | 40:02     | 12:01:01G(1) | 03:01 | 0.03 | 409  |
|       |       |           | 12:01(1)     |       |      |      |
|       |       |           | 12:10(1)     |       |      |      |
| 02:06 | 03:03 | 46:01     | 09:01        | 03:03 | 0.02 | 572  |
| 02:06 | 03:03 | 55:02     | 08:03        | 06:01 | 0.01 | 1036 |
| 02:06 | 03:03 | 55:02     | 08:09        | 04:02 | 0.01 | 1036 |
| 02:06 | 03:03 | 55:02     | 16:02        | 05:02 | 0.01 | 1036 |
| 02:06 | 03:03 | 57:01     | 07:01        | 03:03 | 0.01 | 1036 |
| 02:06 | 03:04 | 13:01     | 11:01        | 03:01 | 0.01 | 1036 |
| 02:06 | 03:04 | 13:01     | 12:02        | 03:01 | 0.05 | 286  |
| 02:06 | 03:04 | 13:01     | 14:05        | 05:03 | 0.01 | 1036 |
| 02:06 | 03:04 | 13:01     | 15:01        | 05:03 | 0.01 | 1036 |
| 02:06 | 03:04 | 13:01     | 15:01        | 06:01 | 0.01 | 1036 |
| 02:06 | 03:04 | 15:01     | 09:01        | 03:03 | 0.01 | 1036 |
| 02:06 | 03:04 | 15:01     | 14:05        | 05:03 | 0.02 | 572  |
| 02:06 | 03:04 | 15:01     | 15:01        | 06:02 | 0.01 | 1036 |
| 02:06 | 03:04 | 15:11     | 09:01        | 03:03 | 0.01 | 1036 |
| 02:06 | 03:04 | 18:01     | 04:05        | 04:01 | 0.01 | 1036 |
| 02:06 | 03:04 | 18:01     | 11:04        | 03:01 | 0.01 | 1036 |
| 02:06 | 03:04 | 39:01     | 15:01        | 06:02 | 0.01 | 1036 |
| 02:06 | 03:04 | 40:01     | 04:05        | 04:01 | 0.01 | 1036 |
| 02:06 | 03:04 | 40:01     | 08:03        | 06:01 | 0.01 | 1036 |
| 02:06 | 03:04 | 40:01     | 09:01        | 03:03 | 0.03 | 409  |
| 02:06 | 03:04 | 40:01     | 11:01        | 03:01 | 0.02 | 572  |
| 02:06 | 03:04 | 40:01     | 12:02        | 03:01 | 0.01 | 1036 |
| 02:06 | 03:04 | 40:01     | 14:54        | 05:03 | 0.02 | 572  |
| 02:06 | 03:04 | 40:01     | 15:01        | 06:02 | 0.01 | 1036 |
| 02:06 | 03:04 | 40:01     | 16:02        | 05:02 | 0.02 | 572  |
| 02:06 | 03:04 | 40:02     | 04:01        | 03:01 | 0.01 | 1036 |
| 02:06 | 03:04 | 40:02     | 09:01        | 03:03 | 0.01 | 1036 |
| 02:06 | 03:04 | 40:02     | 14:54        | 05:03 | 0.01 | 1036 |
| 02:06 | 03:04 | 40:02     | 12:01:01G    | 03:01 | 0.01 | 1036 |
| 02:06 | 03:04 | 40:03     | 09:01        | 03:03 | 0.02 | 572  |
| 02:06 | 03:04 | 40:03     | 12:01        | 03:01 | 0.01 | 1036 |
| 02:06 | 03:04 | 40:03     | 14:05        | 05:03 | 0.01 | 1036 |
| 02:06 | 03:04 | 48:01     | 09:01        | 03:03 | 0.01 | 1036 |
| 02:06 | 03:04 | 48:01     | 15:01        | 06:02 | 0.01 | 1036 |
| 02:06 | 03:04 | 51:01     | 15:01        | 06:02 | 0.01 | 1036 |
| 02:06 | 03:04 | 40:40:01G | 12:01        | 03:01 | 0.01 | 1036 |
| 02:06 | 04:01 | 15:01     | 04:05        | 04:01 | 0.01 | 1036 |
| 02:06 | 04:01 | 15:01     | 11:01        | 03:01 | 0.02 | 572  |
| 02:06 | 04:01 | 15:27     | 04:06        | 03:02 | 0.05 | 286  |
| 02:06 | 04:01 | 15:27     | 12:01        | 03:01 | 0.01 | 1036 |
| 02:06 | 04:01 | 15:27     | 15:01        | 06:02 | 0.03 | 409  |
| 02:06 | 04:01 | 35:01     | 09:01        | 03:03 | 0.01 | 1036 |
| 02:06 | 04:01 | 35:01     | 13:01        | 06:03 | 0.01 | 1036 |
| 02:06 | 04:01 | 40:02     | 09:01        | 03:03 | 0.01 | 1036 |
| 02:06 | 05:01 | 44:02     | 04:01        | 03:02 | 0.01 | 1036 |
| 02:06 | 04:82 | 48:01     | 12:01        | 03:01 | 0.01 | 1036 |
| 02:06 | 06:02 | 13:02     | 07:01        | 02:02 | 0.10 | 115  |
| 02:06 | 06:02 | 50:01     | 07:01        | 02:02 | 0.01 | 1036 |
| 02:06 | 06:02 | 57:01     | 07:01        | 03:03 | 0.02 | 572  |
| 02:06 | 07:01 | 18:01     | 11:01        | 03:01 | 0.01 | 1036 |
| 02:06 | 07:02 | 07:02     | 03:01        | 02:01 | 0.01 | 1036 |
| 02:06 | 07:02 | 07:02     | 09:01        | 03:03 | 0.01 | 1036 |
| 02:06 | 07:02 | 07:02     | 13:02        | 06:09 | 0.01 | 1036 |
| 02:06 | 07:02 | 07:02     | 15:01        | 06:02 | 0.02 | 572  |
| 02:06 | 07:02 | 08:01     | 03:01        | 02:01 | 0.01 | 1036 |
| 02:06 | 07:02 | 13:01     | 12:02        | 03:01 | 0.01 | 1036 |
| 02:06 | 07:02 | 15:01     | 15:01        | 06:02 | 0.01 | 1036 |
| 02:06 | 07:02 | 15:25     | 12:02        | 03:01 | 0.01 | 1036 |

|       |       |       |           |       |      |             |
|-------|-------|-------|-----------|-------|------|-------------|
| 02:06 | 07:02 | 35:01 | 09:01     | 03:03 | 0.02 | <b>572</b>  |
| 02:06 | 07:02 | 38:02 | 08:03     | 06:01 | 0.01 | <b>1036</b> |
| 02:06 | 07:02 | 38:02 | 09:01     | 03:03 | 0.01 | <b>1036</b> |
| 02:06 | 07:02 | 38:02 | 12:02     | 03:01 | 0.01 | <b>1036</b> |
| 02:06 | 07:02 | 39:01 | 08:03     | 06:01 | 0.06 | <b>218</b>  |
| 02:06 | 07:02 | 39:01 | 09:01     | 03:03 | 0.01 | <b>1036</b> |
| 02:06 | 07:02 | 39:01 | 14:02     | 03:01 | 0.01 | <b>1036</b> |
| 02:06 | 07:02 | 39:01 | 14:06     | 03:01 | 0.01 | <b>1036</b> |
| 02:06 | 07:02 | 39:01 | 14:54     | 05:03 | 0.01 | <b>1036</b> |
| 02:06 | 07:02 | 39:01 | 15:01     | 06:01 | 0.01 | <b>1036</b> |
| 02:06 | 07:02 | 39:01 | 15:01     | 06:02 | 0.03 | <b>409</b>  |
| 02:06 | 07:02 | 39:05 | 08:03     | 06:01 | 0.01 | <b>1036</b> |
| 02:06 | 07:02 | 39:09 | 04:05     | 04:01 | 0.01 | <b>1036</b> |
| 02:06 | 07:02 | 40:01 | 04:05     | 04:01 | 0.02 | <b>572</b>  |
| 02:06 | 07:02 | 40:01 | 08:03     | 06:01 | 0.05 | <b>286</b>  |
| 02:06 | 07:02 | 40:01 | 08:09     | 04:02 | 0.01 | <b>1036</b> |
| 02:06 | 07:02 | 40:01 | 09:01     | 03:03 | 0.03 | <b>409</b>  |
| 02:06 | 07:02 | 40:01 | 11:01     | 03:01 | 0.02 | <b>572</b>  |
| 02:06 | 07:02 | 40:01 | 12:02     | 03:01 | 0.01 | <b>1036</b> |
| 02:06 | 07:02 | 40:01 | 12:01:01G | 03:01 | 0.02 | <b>572</b>  |
| 02:06 | 07:02 | 56:01 | 04:06     | 03:02 | 0.02 | <b>572</b>  |
| 02:06 | 07:02 | 56:01 | 11:01     | 03:01 | 0.01 | <b>1036</b> |
| 02:06 | 07:02 | 67:01 | 12:02     | 03:01 | 0.01 | <b>1036</b> |
| 02:06 | 07:04 | 15:18 | 04:01     | 03:01 | 0.01 | <b>1036</b> |
| 02:06 | 07:04 | 15:18 | 04:01     | 03:02 | 0.01 | <b>1036</b> |
| 02:06 | 07:04 | 15:18 | 15:01     | 06:02 | 0.01 | <b>1036</b> |
| 02:06 | 07:04 | 46:01 | 08:03     | 06:01 | 0.01 | <b>1036</b> |
| 02:06 | 07:04 | 51:01 | 09:01     | 03:03 | 0.01 | <b>1036</b> |
| 02:06 | 08:01 | 15:02 | 09:01     | 03:03 | 0.01 | <b>1036</b> |
| 02:06 | 08:01 | 15:02 | 11:01     | 03:01 | 0.01 | <b>1036</b> |
| 02:06 | 08:01 | 15:02 | 12:01     | 03:01 | 0.01 | <b>1036</b> |
| 02:06 | 08:01 | 15:02 | 12:02     | 03:01 | 0.14 | <b>76</b>   |
| 02:06 | 08:01 | 15:02 | 15:01     | 06:01 | 0.01 | <b>1036</b> |
| 02:06 | 08:01 | 15:13 | 12:02     | 03:01 | 0.01 | <b>1036</b> |
| 02:06 | 08:01 | 15:18 | 11:01     | 03:01 | 0.01 | <b>1036</b> |
| 02:06 | 08:01 | 15:18 | 15:01     | 06:02 | 0.01 | <b>1036</b> |
| 02:06 | 08:01 | 35:01 | 12:01     | 03:02 | 0.01 | <b>1036</b> |
| 02:06 | 08:01 | 40:06 | 08:03     | 06:01 | 0.12 | <b>97</b>   |
| 02:06 | 08:01 | 40:06 | 09:01     | 03:03 | 0.23 | <b>37</b>   |
| 02:06 | 08:01 | 40:06 | 12:01     | 03:01 | 0.03 | <b>409</b>  |
| 02:06 | 08:01 | 40:06 | 14:03     | 03:01 | 0.01 | <b>1036</b> |
| 02:06 | 08:01 | 40:06 | 14:05     | 05:03 | 0.05 | <b>286</b>  |
| 02:06 | 08:01 | 40:06 | 16:02     | 05:02 | 0.03 | <b>409</b>  |
| 02:06 | 08:01 | 48:01 | 04:05     | 03:02 | 0.01 | <b>1036</b> |
| 02:06 | 08:01 | 48:01 | 11:01     | 03:01 | 0.01 | <b>1036</b> |
| 02:06 | 08:01 | 48:01 | 15:01     | 05:02 | 0.01 | <b>1036</b> |
| 02:06 | 08:01 | 48:03 | 11:01     | 03:01 | 0.01 | <b>1036</b> |
| 02:06 | 08:01 | 51:01 | 09:01     | 03:03 | 0.01 | <b>1036</b> |
| 02:06 | 08:01 | 55:02 | 08:03     | 06:01 | 0.01 | <b>1036</b> |
| 02:06 | 08:03 | 15:27 | 04:06     | 03:02 | 0.01 | <b>1036</b> |
| 02:06 | 08:03 | 48:01 | 04:05     | 04:01 | 0.01 | <b>1036</b> |
| 02:06 | 08:03 | 48:01 | 07:01     | 02:02 | 0.01 | <b>1036</b> |
| 02:06 | 08:03 | 48:01 | 14:07     | 05:02 | 0.01 | <b>1036</b> |
| 02:06 | 08:03 | 48:01 | 15:01     | 03:01 | 0.01 | <b>1036</b> |
| 02:06 | 08:22 | 40:06 | 04:10     | 04:02 | 0.01 | <b>1036</b> |
| 02:06 | 08:22 | 48:01 | 04:03     | 03:02 | 0.01 | <b>1036</b> |
| 02:06 | 08:22 | 48:01 | 04:05     | 04:01 | 0.02 | <b>572</b>  |
| 02:06 | 08:22 | 48:01 | 04:07     | 03:02 | 0.02 | <b>572</b>  |
| 02:06 | 08:22 | 48:01 | 08:03     | 03:01 | 0.01 | <b>1036</b> |
| 02:06 | 08:22 | 48:01 | 14:54     | 05:02 | 0.01 | <b>1036</b> |
| 02:06 | 08:81 | 40:06 | 11:01     | 03:01 | 0.01 | <b>1036</b> |
| 02:06 | 12:02 | 13:01 | 15:01     | 06:01 | 0.01 | <b>1036</b> |
| 02:06 | 12:02 | 51:02 | 12:02     | 03:01 | 0.01 | <b>1036</b> |

|       |                          |        |       |       |      |      |
|-------|--------------------------|--------|-------|-------|------|------|
| 02:06 | 12:02                    | 52:01  | 07:01 | 02:02 | 0.01 | 1036 |
| 02:06 | 12:02                    | 52:01  | 12:02 | 03:01 | 0.01 | 1036 |
| 02:06 | 12:02                    | 52:01  | 15:02 | 06:01 | 0.02 | 572  |
| 02:06 | 12:03                    | 15:32  | 15:04 | 05:02 | 0.02 | 572  |
| 02:06 | 12:03                    | 55:02  | 04:03 | 03:02 | 0.01 | 1036 |
| 02:06 | 12:03                    | 55:02  | 04:05 | 04:01 | 0.01 | 1036 |
| 02:06 | 12:03                    | 55:02  | 09:01 | 03:03 | 0.01 | 1036 |
| 02:06 | 12:03                    | 55:02  | 12:02 | 03:01 | 0.01 | 1036 |
| 02:06 | 14:02                    | 51:01  | 04:05 | 04:01 | 0.06 | 218  |
| 02:06 | 14:02                    | 51:01  | 04:06 | 03:02 | 0.01 | 1036 |
| 02:06 | 14:02                    | 51:01  | 08:03 | 06:01 | 0.01 | 1036 |
| 02:06 | 14:02                    | 51:01  | 08:04 | 03:01 | 0.01 | 1036 |
| 02:06 | 14:02                    | 51:01  | 09:01 | 03:03 | 0.12 | 97   |
| 02:06 | 14:02                    | 51:01  | 11:01 | 03:01 | 0.05 | 286  |
| 02:06 | 14:02                    | 51:01  | 11:01 | 03:13 | 0.01 | 1036 |
| 02:06 | 14:02                    | 51:01  | 12:01 | 03:01 | 0.13 | 85   |
| 02:06 | 14:02                    | 51:01  | 12:01 | 03:02 | 0.05 | 286  |
| 02:06 | 14:02                    | 51:01  | 13:02 | 03:01 | 0.01 | 1036 |
| 02:06 | 14:02                    | 51:01  | 14:03 | 03:01 | 0.02 | 572  |
| 02:06 | 14:02                    | 51:01  | 14:54 | 05:02 | 0.02 | 572  |
| 02:06 | 14:02                    | 51:01  | 15:01 | 06:02 | 0.10 | 115  |
| 02:06 | 14:02                    | 51:01  | 15:02 | 06:01 | 0.01 | 1036 |
| 02:06 | 14:02                    | 56:03  | 07:01 | 02:02 | 0.01 | 1036 |
| 02:06 | 15:02                    | 27:04  | 04:05 | 04:01 | 0.01 | 1036 |
| 02:06 | 15:02                    | 40:01  | 04:05 | 04:01 | 0.02 | 572  |
| 02:06 | 15:02                    | 40:01  | 07:01 | 02:02 | 0.01 | 1036 |
| 02:06 | 15:02                    | 40:01  | 15:01 | 05:02 | 0.01 | 1036 |
| 02:06 | 15:02                    | 40:01  | 15:01 | 06:02 | 0.02 | 572  |
| 02:06 | 15:02                    | 40:02  | 04:05 | 04:01 | 0.01 | 1036 |
| 02:06 | 15:02                    | 40:06  | 09:01 | 03:03 | 0.01 | 1036 |
| 02:06 | 15:02                    | 46:01  | 08:03 | 06:01 | 0.01 | 1036 |
| 02:06 | 15:02                    | 51:01  | 04:04 | 03:02 | 0.01 | 1036 |
| 02:06 | 15:02                    | 51:01  | 08:02 | 04:02 | 0.01 | 1036 |
| 02:06 | 15:02                    | 51:01  | 11:01 | 03:01 | 0.01 | 1036 |
| 02:06 | 15:02                    | 51:01  | 11:01 | 03:13 | 0.01 | 1036 |
| 02:06 | 15:02                    | 51:01  | 12:02 | 03:01 | 0.01 | 1036 |
| 02:06 | 15:02                    | 51:01  | 15:01 | 06:02 | 0.01 | 1036 |
| 02:06 | 15:02                    | 51:02  | 08:02 | 04:02 | 0.01 | 1036 |
| 02:06 | 15:02                    | 51:02  | 09:01 | 03:03 | 0.02 | 572  |
| 02:06 | 15:02                    | 51:02  | 11:01 | 03:01 | 0.01 | 1036 |
| 02:06 | 15:02                    | 55:02  | 12:02 | 03:01 | 0.01 | 1036 |
| 02:06 | 04:01:01G                | 15:27  | 09:01 | 03:03 | 0.01 | 1036 |
| 02:06 | 04:01:01G                | 35:01  | 14:05 | 05:03 | 0.01 | 1036 |
| 02:06 | 07:01:01G                | 15:17  | 14:54 | 05:03 | 0.01 | 1036 |
| 02:06 | 07:01:01G(1)<br>07:01(1) | 18:01  | 01:01 | 05:01 | 0.02 | 572  |
| 02:06 | 08:01(3)<br>08:22(5)     | 48:01  | 09:01 | 03:03 | 0.09 | 130  |
| 02:06 | 08:01:01G                | 15:18  | 04:05 | 04:01 | 0.01 | 1036 |
| 02:06 | 08:01:01G                | 15:134 | 15:01 | 06:02 | 0.01 | 1036 |
| 02:06 | 08:01:01G                | 40:06  | 04:06 | 03:02 | 0.01 | 1036 |
| 02:06 | 08:01:01G                | 40:06  | 07:01 | 02:02 | 0.01 | 1036 |
| 02:06 | 08:01:01G                | 40:06  | 14:54 | 05:02 | 0.01 | 1036 |
| 02:06 | 08:01:01G(1)<br>08:01(1) | 15:02  | 04:05 | 04:01 | 0.02 | 572  |
| 02:06 | 08:01:01G(1)<br>08:22(2) | 40:06  | 11:01 | 03:01 | 0.03 | 409  |
| 02:06 | 08:01:01G(3)<br>08:01(1) | 40:06  | 15:01 | 06:02 | 0.05 | 286  |
| 02:07 | 01:02                    | 13:01  | 15:01 | 06:01 | 0.01 | 1036 |
| 02:07 | 01:02                    | 15:01  | 09:01 | 03:03 | 0.01 | 1036 |
| 02:07 | 01:02                    | 15:01  | 11:01 | 03:01 | 0.01 | 1036 |
| 02:07 | 01:02                    | 15:01  | 12:01 | 03:01 | 0.01 | 1036 |
| 02:07 | 01:02                    | 15:02  | 09:01 | 03:03 | 0.01 | 1036 |

|       |       |       |           |       |      |      |
|-------|-------|-------|-----------|-------|------|------|
| 02:07 | 01:02 | 15:58 | 09:01     | 03:03 | 0.01 | 1036 |
| 02:07 | 01:02 | 27:04 | 08:03     | 06:01 | 0.01 | 1036 |
| 02:07 | 01:02 | 27:05 | 10:01     | 05:01 | 0.01 | 1036 |
| 02:07 | 01:02 | 40:01 | 09:01     | 03:03 | 0.01 | 1036 |
| 02:07 | 01:02 | 40:02 | 09:01     | 03:03 | 0.01 | 1036 |
| 02:07 | 01:02 | 44:03 | 09:01     | 03:03 | 0.01 | 1036 |
| 02:07 | 01:02 | 46:01 | 03:01     | 02:01 | 0.02 | 572  |
| 02:07 | 01:02 | 46:01 | 04:03     | 03:02 | 0.05 | 286  |
| 02:07 | 01:02 | 46:01 | 04:04     | 03:02 | 0.08 | 151  |
| 02:07 | 01:02 | 46:01 | 04:05     | 03:03 | 0.01 | 1036 |
| 02:07 | 01:02 | 46:01 | 04:05     | 04:01 | 0.23 | 37   |
| 02:07 | 01:02 | 46:01 | 04:05     | 04:02 | 0.01 | 1036 |
| 02:07 | 01:02 | 46:01 | 04:06     | 03:02 | 0.06 | 218  |
| 02:07 | 01:02 | 46:01 | 07:01     | 02:02 | 0.05 | 286  |
| 02:07 | 01:02 | 46:01 | 07:01     | 03:03 | 0.02 | 572  |
| 02:07 | 01:02 | 46:01 | 08:02     | 04:02 | 0.02 | 572  |
| 02:07 | 01:02 | 46:01 | 08:03     | 06:01 | 0.94 | 6    |
| 02:07 | 01:02 | 46:01 | 09:01     | 03:02 | 0.02 | 572  |
| 02:07 | 01:02 | 46:01 | 09:01     | 03:03 | 3.18 | 2    |
| 02:07 | 01:02 | 46:01 | 09:01     | 03:05 | 0.01 | 1036 |
| 02:07 | 01:02 | 46:01 | 09:01     | 06:02 | 0.01 | 1036 |
| 02:07 | 01:02 | 46:01 | 10:01     | 05:01 | 0.01 | 1036 |
| 02:07 | 01:02 | 46:01 | 11:01     | 03:01 | 0.19 | 50   |
| 02:07 | 01:02 | 46:01 | 11:01     | 03:13 | 0.01 | 1036 |
| 02:07 | 01:02 | 46:01 | 11:04     | 03:01 | 0.01 | 1036 |
| 02:07 | 01:02 | 46:01 | 12:01     | 03:01 | 0.08 | 151  |
| 02:07 | 01:02 | 46:01 | 12:01     | 03:02 | 0.01 | 1036 |
| 02:07 | 01:02 | 46:01 | 12:02     | 03:01 | 0.16 | 59   |
| 02:07 | 01:02 | 46:01 | 12:02     | 06:02 | 0.01 | 1036 |
| 02:07 | 01:02 | 46:01 | 13:01     | 06:03 | 0.01 | 1036 |
| 02:07 | 01:02 | 46:01 | 13:02     | 06:09 | 0.02 | 572  |
| 02:07 | 01:02 | 46:01 | 14:05     | 05:03 | 0.05 | 286  |
| 02:07 | 01:02 | 46:01 | 14:54     | 05:02 | 0.17 | 54   |
| 02:07 | 01:02 | 46:01 | 14:54     | 05:03 | 0.01 | 1036 |
| 02:07 | 01:02 | 46:01 | 15:01     | 05:02 | 0.02 | 572  |
| 02:07 | 01:02 | 46:01 | 15:01     | 06:01 | 0.01 | 1036 |
| 02:07 | 01:02 | 46:01 | 15:01     | 06:02 | 0.06 | 218  |
| 02:07 | 01:02 | 46:01 | 15:02     | 05:02 | 0.01 | 1036 |
| 02:07 | 01:02 | 46:01 | 15:02     | 06:02 | 0.01 | 1036 |
| 02:07 | 01:02 | 46:01 | 16:02     | 05:02 | 0.02 | 572  |
| 02:07 | 01:02 | 46:01 | 12:01:01G | 03:03 | 0.01 | 1036 |
| 02:07 | 01:02 | 51:01 | 08:03     | 06:01 | 0.01 | 1036 |
| 02:07 | 01:02 | 54:01 | 04:05     | 04:01 | 0.03 | 409  |
| 02:07 | 01:02 | 54:01 | 08:03     | 06:01 | 0.02 | 572  |
| 02:07 | 01:02 | 54:01 | 09:01     | 03:02 | 0.01 | 1036 |
| 02:07 | 01:02 | 54:01 | 11:01     | 03:01 | 0.02 | 572  |
| 02:07 | 01:02 | 54:01 | 14:05     | 05:03 | 0.01 | 1036 |
| 02:07 | 01:02 | 54:01 | 15:01     | 06:02 | 0.02 | 572  |
| 02:07 | 01:02 | 55:02 | 04:05     | 04:01 | 0.01 | 1036 |
| 02:07 | 01:02 | 55:02 | 07:01     | 03:03 | 0.01 | 1036 |
| 02:07 | 01:02 | 55:02 | 09:01     | 03:03 | 0.03 | 409  |
| 02:07 | 01:02 | 55:02 | 11:01     | 03:01 | 0.01 | 1036 |
| 02:07 | 01:02 | 55:02 | 14:07     | 05:02 | 0.01 | 1036 |
| 02:07 | 01:02 | 56:04 | 08:03     | 06:01 | 0.01 | 1036 |
| 02:07 | 01:03 | 46:01 | 04:05     | 04:01 | 0.02 | 572  |
| 02:07 | 01:03 | 46:01 | 07:01     | 02:02 | 0.01 | 1036 |
| 02:07 | 01:03 | 46:01 | 09:01     | 03:03 | 0.31 | 26   |
| 02:07 | 01:03 | 46:01 | 09:01     | 04:02 | 0.01 | 1036 |
| 02:07 | 01:03 | 46:01 | 11:01     | 03:01 | 0.01 | 1036 |
| 02:07 | 01:03 | 46:01 | 12:01     | 03:01 | 0.01 | 1036 |
| 02:07 | 01:03 | 46:01 | 14:54     | 05:02 | 0.01 | 1036 |
| 02:07 | 01:03 | 46:01 | 14:54     | 05:03 | 0.01 | 1036 |
| 02:07 | 01:03 | 46:01 | 15:01     | 06:02 | 0.02 | 572  |



|       |       |       |           |       |      |      |
|-------|-------|-------|-----------|-------|------|------|
| 02:07 | 01:08 | 46:01 | 09:01     | 03:03 | 0.01 | 1036 |
| 02:07 | 03:02 | 58:01 | 03:01     | 02:01 | 0.06 | 218  |
| 02:07 | 03:02 | 58:01 | 13:01     | 06:03 | 0.01 | 1036 |
| 02:07 | 03:02 | 58:01 | 13:02     | 06:09 | 0.02 | 572  |
| 02:07 | 03:03 | 15:01 | 08:03     | 06:01 | 0.01 | 1036 |
| 02:07 | 03:03 | 15:01 | 09:01     | 03:03 | 0.03 | 409  |
| 02:07 | 03:03 | 15:01 | 12:02     | 03:01 | 0.01 | 1036 |
| 02:07 | 03:03 | 15:01 | 12:10     | 03:01 | 0.02 | 572  |
| 02:07 | 03:03 | 15:01 | 15:01     | 03:01 | 0.02 | 572  |
| 02:07 | 03:03 | 15:01 | 12:01:01G | 06:01 | 0.01 | 1036 |
| 02:07 | 03:03 | 15:11 | 04:05     | 04:01 | 0.01 | 1036 |
| 02:07 | 03:03 | 15:11 | 08:03     | 06:01 | 0.01 | 1036 |
| 02:07 | 03:03 | 15:11 | 09:01     | 03:03 | 0.01 | 1036 |
| 02:07 | 03:03 | 15:12 | 15:02     | 05:02 | 0.01 | 1036 |
| 02:07 | 03:03 | 35:01 | 09:01     | 03:03 | 0.02 | 572  |
| 02:07 | 03:03 | 35:01 | 15:01     | 06:02 | 0.02 | 572  |
| 02:07 | 03:03 | 40:01 | 09:01     | 03:03 | 0.01 | 1036 |
| 02:07 | 03:03 | 40:02 | 12:01:01G | 03:01 | 0.01 | 1036 |
| 02:07 | 03:03 | 54:01 | 08:03     | 06:01 | 0.01 | 1036 |
| 02:07 | 03:03 | 55:02 | 04:04     | 03:02 | 0.01 | 1036 |
| 02:07 | 03:03 | 55:02 | 15:01     | 06:02 | 0.01 | 1036 |
| 02:07 | 03:04 | 13:01 | 12:02     | 03:01 | 0.03 | 409  |
| 02:07 | 03:04 | 13:01 | 14:05     | 05:03 | 0.01 | 1036 |
| 02:07 | 03:04 | 13:01 | 15:01     | 05:02 | 0.01 | 1036 |
| 02:07 | 03:04 | 13:01 | 15:01     | 06:01 | 0.06 | 218  |
| 02:07 | 03:04 | 13:01 | 15:01     | 06:02 | 0.01 | 1036 |
| 02:07 | 03:04 | 13:01 | 16:02     | 05:02 | 0.01 | 1036 |
| 02:07 | 03:04 | 13:01 | 16:10     | 05:02 | 0.01 | 1036 |
| 02:07 | 03:04 | 40:01 | 04:05     | 04:01 | 0.02 | 572  |
| 02:07 | 03:04 | 40:01 | 04:06     | 03:02 | 0.01 | 1036 |
| 02:07 | 03:04 | 40:01 | 09:01     | 03:03 | 0.05 | 286  |
| 02:07 | 03:04 | 40:01 | 11:01     | 03:01 | 0.01 | 1036 |
| 02:07 | 03:04 | 40:01 | 15:01     | 05:02 | 0.01 | 1036 |
| 02:07 | 03:04 | 40:01 | 15:01     | 06:02 | 0.01 | 1036 |
| 02:07 | 03:04 | 40:02 | 04:06     | 03:02 | 0.01 | 1036 |
| 02:07 | 03:04 | 40:02 | 09:01     | 03:03 | 0.01 | 1036 |
| 02:07 | 03:04 | 40:03 | 11:01     | 03:01 | 0.01 | 1036 |
| 02:07 | 03:04 | 56:04 | 15:02     | 05:01 | 0.01 | 1036 |
| 02:07 | 04:01 | 15:01 | 04:06     | 03:02 | 0.06 | 218  |
| 02:07 | 04:01 | 15:27 | 04:06     | 03:02 | 0.02 | 572  |
| 02:07 | 04:01 | 15:27 | 09:01     | 03:03 | 0.01 | 1036 |
| 02:07 | 04:01 | 35:01 | 01:01     | 05:01 | 0.01 | 1036 |
| 02:07 | 04:01 | 35:01 | 08:03     | 06:01 | 0.01 | 1036 |
| 02:07 | 04:01 | 35:01 | 09:01     | 03:03 | 0.01 | 1036 |
| 02:07 | 04:01 | 35:03 | 15:01     | 06:02 | 0.01 | 1036 |
| 02:07 | 04:01 | 35:05 | 13:12     | 03:01 | 0.01 | 1036 |
| 02:07 | 04:01 | 40:01 | 09:01     | 03:03 | 0.01 | 1036 |
| 02:07 | 04:01 | 54:01 | 04:05     | 04:01 | 0.01 | 1036 |
| 02:07 | 04:03 | 15:25 | 12:02     | 03:01 | 0.01 | 1036 |
| 02:07 | 04:03 | 40:01 | 14:54     | 05:02 | 0.01 | 1036 |
| 02:07 | 06:02 | 13:02 | 07:01     | 02:02 | 0.03 | 409  |
| 02:07 | 06:02 | 55:02 | 11:01     | 03:01 | 0.01 | 1036 |
| 02:07 | 06:02 | 57:01 | 07:01     | 03:03 | 0.01 | 1036 |
| 02:07 | 07:02 | 07:02 | 01:01     | 05:01 | 0.01 | 1036 |
| 02:07 | 07:02 | 07:02 | 03:01     | 02:01 | 0.01 | 1036 |
| 02:07 | 07:02 | 13:01 | 12:02     | 03:01 | 0.01 | 1036 |
| 02:07 | 07:02 | 15:01 | 09:01     | 03:03 | 0.01 | 1036 |
| 02:07 | 07:02 | 15:01 | 12:02     | 03:01 | 0.01 | 1036 |
| 02:07 | 07:02 | 38:02 | 09:01     | 03:03 | 0.03 | 409  |
| 02:07 | 07:02 | 38:02 | 15:02     | 05:01 | 0.02 | 572  |
| 02:07 | 07:02 | 39:01 | 04:04     | 03:02 | 0.01 | 1036 |
| 02:07 | 07:02 | 39:01 | 04:10     | 04:02 | 0.01 | 1036 |
| 02:07 | 07:02 | 39:01 | 08:03     | 06:01 | 0.02 | 572  |

|       |           |       |              |       |      |      |
|-------|-----------|-------|--------------|-------|------|------|
| 02:07 | 07:02     | 39:01 | 15:01        | 06:02 | 0.01 | 1036 |
| 02:07 | 07:02     | 39:05 | 14:54        | 05:03 | 0.01 | 1036 |
| 02:07 | 07:02     | 40:01 | 04:03        | 03:02 | 0.01 | 1036 |
| 02:07 | 07:02     | 40:01 | 04:05        | 04:01 | 0.03 | 409  |
| 02:07 | 07:02     | 40:01 | 04:06        | 03:02 | 0.01 | 1036 |
| 02:07 | 07:02     | 40:01 | 08:03        | 06:01 | 0.06 | 218  |
| 02:07 | 07:02     | 40:01 | 09:01        | 03:03 | 0.05 | 286  |
| 02:07 | 07:02     | 40:01 | 11:01        | 03:01 | 0.01 | 1036 |
| 02:07 | 07:02     | 40:01 | 12:01        | 03:01 | 0.01 | 1036 |
| 02:07 | 07:02     | 40:01 | 13:02        | 06:09 | 0.01 | 1036 |
| 02:07 | 07:02     | 40:01 | 14:54        | 05:02 | 0.01 | 1036 |
| 02:07 | 07:02     | 40:01 | 15:01        | 06:01 | 0.01 | 1036 |
| 02:07 | 07:02     | 40:01 | 15:01        | 06:02 | 0.02 | 572  |
| 02:07 | 07:02     | 40:01 | 15:02        | 05:01 | 0.01 | 1036 |
| 02:07 | 07:02     | 40:02 | 15:01        | 06:02 | 0.01 | 1036 |
| 02:07 | 07:02     | 55:02 | 12:02        | 03:01 | 0.01 | 1036 |
| 02:07 | 07:02     | 56:01 | 14:54        | 05:03 | 0.02 | 572  |
| 02:07 | 07:02     | 67:01 | 09:01        | 03:03 | 0.01 | 1036 |
| 02:07 | 07:02     | 67:01 | 14:54        | 05:02 | 0.01 | 1036 |
| 02:07 | 07:02     | 67:01 | 16:02        | 05:02 | 0.02 | 572  |
| 02:07 | 07:04     | 15:18 | 04:01        | 03:01 | 0.02 | 572  |
| 02:07 | 07:04     | 51:01 | 09:01        | 03:03 | 0.01 | 1036 |
| 02:07 | 07:06     | 44:03 | 07:01        | 02:02 | 0.01 | 1036 |
| 02:07 | 07:06     | 44:03 | 13:02        | 06:04 | 0.01 | 1036 |
| 02:07 | 08:01     | 13:02 | 07:01        | 02:02 | 0.01 | 1036 |
| 02:07 | 08:01     | 15:02 | 12:02        | 03:01 | 0.06 | 218  |
| 02:07 | 08:01     | 15:02 | 13:02        | 06:04 | 0.01 | 1036 |
| 02:07 | 08:01     | 15:02 | 15:01        | 06:01 | 0.06 | 218  |
| 02:07 | 08:01     | 15:02 | 15:01        | 06:02 | 0.01 | 1036 |
| 02:07 | 08:01     | 15:18 | 04:04        | 03:02 | 0.01 | 1036 |
| 02:07 | 08:01     | 38:02 | 15:02        | 05:01 | 0.01 | 1036 |
| 02:07 | 08:01     | 40:06 | 15:01        | 06:02 | 0.01 | 1036 |
| 02:07 | 08:01     | 48:01 | 04:05        | 04:02 | 0.01 | 1036 |
| 02:07 | 08:03     | 48:01 | 12:05        | 03:01 | 0.01 | 1036 |
| 02:07 | 12:02     | 27:04 | 04:05        | 04:01 | 0.01 | 1036 |
| 02:07 | 12:02     | 27:04 | 09:01        | 03:03 | 0.01 | 1036 |
| 02:07 | 12:02     | 52:01 | 15:02        | 06:01 | 0.01 | 1036 |
| 02:07 | 12:02     | 55:02 | 04:05        | 04:01 | 0.01 | 1036 |
| 02:07 | 12:03     | 18:01 | 15:01        | 06:02 | 0.01 | 1036 |
| 02:07 | 12:03     | 55:02 | 04:03        | 03:02 | 0.01 | 1036 |
| 02:07 | 12:03     | 55:02 | 04:05        | 04:01 | 0.01 | 1036 |
| 02:07 | 14:02     | 51:01 | 04:10        | 04:02 | 0.01 | 1036 |
| 02:07 | 14:02     | 51:01 | 09:01        | 03:03 | 0.08 | 151  |
| 02:07 | 14:02     | 51:01 | 12:02        | 03:01 | 0.01 | 1036 |
| 02:07 | 14:02     | 51:01 | 15:01        | 05:02 | 0.01 | 1036 |
| 02:07 | 14:02     | 51:01 | 15:01        | 06:02 | 0.01 | 1036 |
| 02:07 | 14:02     | 51:01 | 15:01        | 06:47 | 0.01 | 1036 |
| 02:07 | 14:02     | 51:01 | 16:02        | 05:02 | 0.03 | 409  |
| 02:07 | 14:02     | 51:01 | 12:01:01G(2) | 03:02 | 0.03 | 409  |
| 02:07 | 15:02     | 27:04 | 12:01(1)     | 03:03 | 0.01 | 1036 |
| 02:07 | 15:02     | 40:01 | 11:01        | 03:03 | 0.01 | 1036 |
| 02:07 | 15:02     | 40:02 | 15:02        | 06:01 | 0.01 | 1036 |
| 02:07 | 15:02     | 40:02 | 09:01        | 03:03 | 0.01 | 1036 |
| 02:07 | 15:02     | 51:02 | 08:02        | 04:02 | 0.01 | 1036 |
| 02:07 | 15:02     | 51:02 | 08:03        | 03:01 | 0.01 | 1036 |
| 02:07 | 15:02     | 51:02 | 09:01        | 03:03 | 0.01 | 1036 |
| 02:07 | 15:02     | 51:02 | 11:01        | 03:01 | 0.01 | 1036 |
| 02:07 | 15:02     | 51:02 | 14:54        | 05:02 | 0.01 | 1036 |
| 02:07 | 15:05     | 07:05 | 08:03        | 03:01 | 0.01 | 1036 |
| 02:07 | 16:02     | 51:01 | 15:01        | 06:02 | 0.01 | 1036 |
| 02:07 | 04:01:01G | 15:01 | 11:19        | 03:01 | 0.01 | 1036 |
| 02:07 | 07:01:01G | 49:01 | 07:01        | 02:02 | 0.01 | 1036 |

|       |              |       |           |       |      |      |
|-------|--------------|-------|-----------|-------|------|------|
| 02:07 | 08:01(1)     | 48:01 | 09:01     | 03:03 | 0.02 | 572  |
|       | 08:22(1)     |       |           |       |      |      |
| 02:07 | 08:01:01G    | 48:01 | 14:54     | 05:03 | 0.01 | 1036 |
|       | 08:01:01G(1) |       |           |       |      |      |
| 02:07 | 08:01(1)     | 40:06 | 09:01     | 03:03 | 0.02 | 572  |
|       | 03:02        |       |           |       |      |      |
| 02:09 | 03:02        | 58:01 | 03:01     | 02:01 | 0.01 | 1036 |
| 02:09 | 16:02        | 07:02 | 01:01     | 05:01 | 0.01 | 1036 |
| 02:09 | 16:02        | 51:01 | 01:01     | 05:01 | 0.01 | 1036 |
| 02:10 | 03:02        | 58:01 | 13:02     | 06:09 | 0.01 | 1036 |
| 02:10 | 03:03        | 15:11 | 09:01     | 03:03 | 0.01 | 1036 |
| 02:10 | 07:02        | 07:02 | 07:01     | 03:03 | 0.01 | 1036 |
| 02:10 | 07:02        | 39:01 | 08:03     | 06:01 | 0.01 | 1036 |
| 02:10 | 08:01        | 40:06 | 03:01     | 02:01 | 0.01 | 1036 |
| 02:10 | 08:01        | 40:06 | 08:03     | 06:01 | 0.01 | 1036 |
| 02:10 | 08:01        | 40:06 | 09:01     | 03:03 | 0.02 | 572  |
| 02:10 | 08:01        | 40:06 | 11:01     | 03:01 | 0.02 | 572  |
| 02:10 | 08:01        | 40:06 | 12:01     | 03:01 | 0.13 | 85   |
| 02:10 | 08:01        | 40:06 | 14:04     | 05:03 | 0.01 | 1036 |
| 02:10 | 08:01        | 40:06 | 15:01     | 06:02 | 0.01 | 1036 |
| 02:10 | 04:01:01G    | 48:01 | 12:01:01G | 03:01 | 0.02 | 572  |
| 03:01 | 01:02        | 27:05 | 04:04     | 03:02 | 0.03 | 409  |
| 03:01 | 01:02        | 46:01 | 08:03     | 06:01 | 0.01 | 1036 |
| 03:01 | 01:02        | 46:01 | 09:01     | 03:03 | 0.02 | 572  |
| 03:01 | 01:02        | 46:01 | 12:02     | 03:01 | 0.01 | 1036 |
| 03:01 | 01:02        | 54:01 | 04:05     | 04:01 | 0.01 | 1036 |
| 03:01 | 01:02        | 54:01 | 14:05     | 05:03 | 0.01 | 1036 |
| 03:01 | 02:02        | 13:01 | 15:01     | 06:02 | 0.01 | 1036 |
| 03:01 | 02:02        | 27:05 | 03:01     | 02:01 | 0.01 | 1036 |
| 03:01 | 02:02        | 27:05 | 04:01     | 03:01 | 0.08 | 151  |
| 03:01 | 02:02        | 27:05 | 04:08     | 03:01 | 0.05 | 286  |
| 03:01 | 02:02        | 27:05 | 07:01     | 02:02 | 0.01 | 1036 |
| 03:01 | 02:02        | 27:05 | 09:01     | 03:03 | 0.02 | 572  |
| 03:01 | 02:02        | 27:05 | 10:01     | 05:01 | 0.06 | 218  |
| 03:01 | 02:02        | 27:05 | 12:02     | 03:01 | 0.01 | 1036 |
| 03:01 | 02:02        | 27:05 | 12:10     | 03:01 | 0.01 | 1036 |
| 03:01 | 02:02        | 27:05 | 13:02     | 06:09 | 0.01 | 1036 |
| 03:01 | 02:02        | 40:01 | 09:01     | 03:03 | 0.01 | 1036 |
| 03:01 | 03:02        | 58:01 | 09:01     | 03:03 | 0.01 | 1036 |
| 03:01 | 03:02        | 58:01 | 13:02     | 06:09 | 0.01 | 1036 |
| 03:01 | 03:03        | 07:02 | 15:01     | 06:02 | 0.01 | 1036 |
| 03:01 | 03:03        | 15:01 | 15:01     | 05:02 | 0.01 | 1036 |
| 03:01 | 03:03        | 15:11 | 09:01     | 03:03 | 0.01 | 1036 |
| 03:01 | 03:03        | 35:01 | 09:01     | 03:03 | 0.01 | 1036 |
| 03:01 | 03:03        | 35:01 | 15:01     | 06:01 | 0.01 | 1036 |
| 03:01 | 03:03        | 35:01 | 15:01     | 06:02 | 0.01 | 1036 |
| 03:01 | 03:03        | 35:01 | 12:01:01G | 03:01 | 0.01 | 1036 |
| 03:01 | 03:04        | 13:01 | 12:02     | 03:01 | 0.01 | 1036 |
| 03:01 | 03:04        | 40:01 | 09:01     | 03:03 | 0.01 | 1036 |
| 03:01 | 03:04        | 40:02 | 11:06     | 03:01 | 0.01 | 1036 |
| 03:01 | 04:01        | 35:01 | 01:01     | 05:01 | 0.05 | 286  |
| 03:01 | 04:01        | 35:03 | 11:01     | 03:01 | 0.01 | 1036 |
| 03:01 | 04:03        | 15:25 | 12:02     | 03:01 | 0.01 | 1036 |
| 03:01 | 05:01        | 44:02 | 01:01     | 05:01 | 0.03 | 409  |
| 03:01 | 05:01        | 44:02 | 04:07     | 03:01 | 0.01 | 1036 |
| 03:01 | 05:01        | 44:02 | 04:10     | 04:02 | 0.01 | 1036 |
| 03:01 | 05:01        | 44:02 | 08:03     | 06:01 | 0.01 | 1036 |
| 03:01 | 05:01        | 44:02 | 09:01     | 03:03 | 0.02 | 572  |
| 03:01 | 05:01        | 44:02 | 12:02     | 03:01 | 0.01 | 1036 |
| 03:01 | 05:01        | 44:02 | 13:01     | 06:03 | 0.13 | 85   |
| 03:01 | 05:01        | 44:02 | 15:02     | 06:01 | 0.01 | 1036 |
| 03:01 | 06:02        | 13:02 | 07:01     | 02:02 | 0.06 | 218  |
| 03:01 | 07:01        | 18:01 | 11:04     | 03:01 | 0.02 | 572  |
| 03:01 | 07:01        | 18:01 | 14:54     | 05:02 | 0.01 | 1036 |

|        |                          |       |       |       |      |      |
|--------|--------------------------|-------|-------|-------|------|------|
| 03:01  | 07:02                    | 07:02 | 01:01 | 05:01 | 0.01 | 1036 |
| 03:01  | 07:02                    | 07:02 | 04:03 | 03:02 | 0.01 | 1036 |
| 03:01  | 07:02                    | 07:02 | 04:08 | 03:01 | 0.01 | 1036 |
| 03:01  | 07:02                    | 07:02 | 07:01 | 03:03 | 0.09 | 130  |
| 03:01  | 07:02                    | 07:02 | 09:01 | 03:03 | 0.02 | 572  |
| 03:01  | 07:02                    | 07:02 | 12:02 | 03:01 | 0.01 | 1036 |
| 03:01  | 07:02                    | 07:02 | 13:01 | 06:03 | 0.03 | 409  |
| 03:01  | 07:02                    | 07:02 | 14:54 | 05:02 | 0.01 | 1036 |
| 03:01  | 07:02                    | 07:02 | 15:01 | 06:02 | 0.14 | 76   |
| 03:01  | 07:02                    | 08:01 | 03:01 | 02:01 | 0.02 | 572  |
| 03:01  | 07:02                    | 15:01 | 15:02 | 06:01 | 0.01 | 1036 |
| 03:01  | 07:02                    | 38:02 | 04:03 | 03:02 | 0.01 | 1036 |
| 03:01  | 07:02                    | 40:01 | 09:01 | 03:03 | 0.01 | 1036 |
| 03:01  | 07:02                    | 56:01 | 09:01 | 03:03 | 0.01 | 1036 |
| 03:01  | 07:02                    | 67:01 | 16:02 | 05:02 | 0.01 | 1036 |
| 03:01  | 08:01                    | 15:02 | 16:02 | 05:02 | 0.01 | 1036 |
| 03:01  | 08:01                    | 40:06 | 04:05 | 04:01 | 0.01 | 1036 |
| 03:01  | 08:01                    | 40:06 | 09:01 | 03:03 | 0.01 | 1036 |
| 03:01  | 12:02                    | 27:04 | 15:01 | 06:02 | 0.01 | 1036 |
| 03:01  | 12:02                    | 52:01 | 04:01 | 03:02 | 0.01 | 1036 |
| 03:01  | 12:02                    | 52:01 | 07:01 | 03:03 | 0.02 | 572  |
| 03:01  | 12:02                    | 52:01 | 11:01 | 03:01 | 0.01 | 1036 |
| 03:01  | 12:02                    | 52:01 | 12:01 | 03:01 | 0.01 | 1036 |
| 03:01  | 12:02                    | 52:01 | 13:02 | 06:04 | 0.03 | 409  |
| 03:01  | 12:02                    | 52:01 | 14:04 | 05:03 | 0.03 | 409  |
| 03:01  | 12:02                    | 52:01 | 15:02 | 06:01 | 0.02 | 572  |
| 03:01  | 12:03                    | 18:01 | 13:01 | 06:03 | 0.01 | 1036 |
| 03:01  | 12:03                    | 18:01 | 15:01 | 06:02 | 0.01 | 1036 |
| 03:01  | 12:03                    | 35:03 | 07:01 | 02:02 | 0.01 | 1036 |
| 03:01  | 12:03                    | 35:03 | 07:01 | 03:03 | 0.15 | 64   |
| 03:01  | 12:03                    | 35:03 | 12:01 | 03:01 | 0.01 | 1036 |
| 03:01  | 12:03                    | 35:03 | 13:01 | 06:03 | 0.02 | 572  |
| 03:01  | 12:03                    | 35:03 | 15:01 | 06:02 | 0.01 | 1036 |
| 03:01  | 12:03                    | 38:01 | 04:02 | 03:02 | 0.01 | 1036 |
| 03:01  | 12:03                    | 38:01 | 07:01 | 02:02 | 0.05 | 286  |
| 03:01  | 12:03                    | 38:01 | 09:01 | 03:03 | 0.01 | 1036 |
| 03:01  | 12:03                    | 38:01 | 14:01 | 05:03 | 0.01 | 1036 |
| 03:01  | 12:03                    | 44:02 | 12:02 | 03:01 | 0.01 | 1036 |
| 03:01  | 14:02                    | 51:01 | 04:05 | 04:01 | 0.01 | 1036 |
| 03:01  | 14:02                    | 51:01 | 09:01 | 03:03 | 0.01 | 1036 |
| 03:01  | 14:02                    | 51:01 | 11:01 | 03:01 | 0.01 | 1036 |
| 03:01  | 14:02                    | 51:01 | 13:01 | 06:03 | 0.02 | 572  |
| 03:01  | 14:02                    | 51:01 | 14:04 | 05:03 | 0.01 | 1036 |
| 03:01  | 14:02                    | 51:01 | 15:01 | 06:01 | 0.01 | 1036 |
| 03:01  | 14:02                    | 51:01 | 16:02 | 05:02 | 0.01 | 1036 |
| 03:01  | 15:02                    | 07:02 | 15:01 | 06:02 | 0.01 | 1036 |
| 03:01  | 15:02                    | 27:07 | 11:01 | 03:01 | 0.01 | 1036 |
| 03:01  | 15:02                    | 51:01 | 01:01 | 05:01 | 0.02 | 572  |
| 03:01  | 15:02                    | 51:01 | 04:01 | 03:01 | 0.01 | 1036 |
| 03:01  | 15:02                    | 51:01 | 04:02 | 03:02 | 0.01 | 1036 |
| 03:01  | 15:04                    | 51:01 | 07:01 | 02:02 | 0.01 | 1036 |
| 03:01  | 16:02                    | 51:01 | 07:01 | 02:02 | 0.01 | 1036 |
| 03:01  | 04:01:01G                | 35:05 | 12:02 | 03:01 | 0.01 | 1036 |
| 03:01  | 04:01:01G(1)<br>04:01(2) | 35:03 | 12:01 | 03:01 | 0.03 | 409  |
| 03:01  | 07:01:01G                | 18:01 | 04:04 | 03:02 | 0.01 | 1036 |
| 03:01  | 07:01:01G                | 18:01 | 12:02 | 03:01 | 0.01 | 1036 |
| 03:01  | 08:01:01G                | 15:01 | 12:02 | 03:01 | 0.01 | 1036 |
| 03:02  | 06:02                    | 13:02 | 07:01 | 02:02 | 0.01 | 1036 |
| 03:02  | 07:01                    | 15:17 | 13:02 | 06:04 | 0.01 | 1036 |
| 03:02  | 07:02                    | 08:01 | 03:01 | 02:01 | 0.01 | 1036 |
| 02:264 | 01:02                    | 55:02 | 09:01 | 03:03 | 0.01 | 1036 |
| 02:419 | 08:01:01G                | 15:01 | 14:05 | 05:03 | 0.01 | 1036 |

|       |       |       |                          |       |      |      |
|-------|-------|-------|--------------------------|-------|------|------|
| 11:01 | 01:02 | 13:01 | 12:02                    | 03:01 | 0.01 | 1036 |
| 11:01 | 01:02 | 15:01 | 04:05                    | 04:01 | 0.02 | 572  |
| 11:01 | 01:02 | 15:01 | 08:02                    | 04:02 | 0.01 | 1036 |
| 11:01 | 01:02 | 15:01 | 08:03                    | 06:01 | 0.01 | 1036 |
| 11:01 | 01:02 | 15:01 | 09:01                    | 03:03 | 0.07 | 177  |
| 11:01 | 01:02 | 15:01 | 11:01                    | 03:01 | 0.05 | 286  |
| 11:01 | 01:02 | 15:01 | 14:05                    | 05:03 | 0.01 | 1036 |
| 11:01 | 01:02 | 15:01 | 14:54                    | 03:02 | 0.01 | 1036 |
| 11:01 | 01:02 | 15:01 | 14:54                    | 05:02 | 0.05 | 286  |
| 11:01 | 01:02 | 15:01 | 15:01                    | 06:02 | 0.01 | 1036 |
| 11:01 | 01:02 | 15:01 | 12:01:01G(2)<br>12:01(1) | 03:01 | 0.03 | 409  |
| 11:01 | 01:02 | 15:12 | 12:02                    | 03:01 | 0.01 | 1036 |
| 11:01 | 01:02 | 15:58 | 04:05                    | 04:01 | 0.01 | 1036 |
| 11:01 | 01:02 | 15:58 | 09:01                    | 03:03 | 0.01 | 1036 |
| 11:01 | 01:02 | 15:58 | 12:02                    | 03:01 | 0.01 | 1036 |
| 11:01 | 01:02 | 15:58 | 14:54                    | 05:02 | 0.03 | 409  |
| 11:01 | 01:02 | 15:58 | 14:54                    | 05:03 | 0.01 | 1036 |
| 11:01 | 01:02 | 15:58 | 15:01                    | 06:02 | 0.01 | 1036 |
| 11:01 | 01:02 | 15:58 | 15:02                    | 06:02 | 0.01 | 1036 |
| 11:01 | 01:02 | 27:05 | 04:05                    | 04:01 | 0.01 | 1036 |
| 11:01 | 01:02 | 40:01 | 09:01                    | 03:03 | 0.01 | 1036 |
| 11:01 | 01:02 | 40:01 | 12:01                    | 03:01 | 0.01 | 1036 |
| 11:01 | 01:02 | 40:01 | 12:02                    | 03:01 | 0.01 | 1036 |
| 11:01 | 01:02 | 46:01 | 04:04                    | 03:02 | 0.06 | 218  |
| 11:01 | 01:02 | 46:01 | 04:05                    | 04:01 | 0.02 | 572  |
| 11:01 | 01:02 | 46:01 | 04:06                    | 03:02 | 0.01 | 1036 |
| 11:01 | 01:02 | 46:01 | 07:01                    | 02:02 | 0.01 | 1036 |
| 11:01 | 01:02 | 46:01 | 07:01                    | 03:03 | 0.02 | 572  |
| 11:01 | 01:02 | 46:01 | 08:02                    | 04:02 | 0.01 | 1036 |
| 11:01 | 01:02 | 46:01 | 08:03                    | 06:01 | 0.15 | 64   |
| 11:01 | 01:02 | 46:01 | 09:01                    | 03:03 | 0.46 | 16   |
| 11:01 | 01:02 | 46:01 | 11:01                    | 03:01 | 0.03 | 409  |
| 11:01 | 01:02 | 46:01 | 12:01                    | 03:01 | 0.03 | 409  |
| 11:01 | 01:02 | 46:01 | 12:02                    | 03:01 | 0.06 | 218  |
| 11:01 | 01:02 | 46:01 | 13:03                    | 03:01 | 0.01 | 1036 |
| 11:01 | 01:02 | 46:01 | 14:05                    | 05:03 | 0.02 | 572  |
| 11:01 | 01:02 | 46:01 | 14:54                    | 05:02 | 0.05 | 286  |
| 11:01 | 01:02 | 46:01 | 15:01                    | 06:02 | 0.05 | 286  |
| 11:01 | 01:02 | 46:01 | 15:02                    | 05:02 | 0.01 | 1036 |
| 11:01 | 01:02 | 46:01 | 16:02                    | 05:02 | 0.03 | 409  |
| 11:01 | 01:02 | 46:08 | 09:01                    | 03:03 | 0.01 | 1036 |
| 11:01 | 01:02 | 48:01 | 04:03                    | 03:02 | 0.01 | 1036 |
| 11:01 | 01:02 | 51:01 | 08:03                    | 06:01 | 0.01 | 1036 |
| 11:01 | 01:02 | 51:01 | 09:01                    | 03:03 | 0.01 | 1036 |
| 11:01 | 01:02 | 51:02 | 09:01                    | 03:03 | 0.01 | 1036 |
| 11:01 | 01:02 | 54:01 | 01:01                    | 05:01 | 0.01 | 1036 |
| 11:01 | 01:02 | 54:01 | 04:05                    | 03:01 | 0.01 | 1036 |
| 11:01 | 01:02 | 54:01 | 04:05                    | 03:03 | 0.02 | 572  |
| 11:01 | 01:02 | 54:01 | 04:05                    | 04:01 | 0.28 | 34   |
| 11:01 | 01:02 | 54:01 | 04:06                    | 03:02 | 0.01 | 1036 |
| 11:01 | 01:02 | 54:01 | 07:01                    | 02:02 | 0.02 | 572  |
| 11:01 | 01:02 | 54:01 | 08:02                    | 04:02 | 0.01 | 1036 |
| 11:01 | 01:02 | 54:01 | 08:03                    | 06:01 | 0.02 | 572  |
| 11:01 | 01:02 | 54:01 | 08:09                    | 04:02 | 0.01 | 1036 |
| 11:01 | 01:02 | 54:01 | 09:01                    | 03:03 | 0.13 | 85   |
| 11:01 | 01:02 | 54:01 | 11:01                    | 03:01 | 0.06 | 218  |
| 11:01 | 01:02 | 54:01 | 12:01                    | 03:01 | 0.02 | 572  |
| 11:01 | 01:02 | 54:01 | 12:02                    | 03:01 | 0.01 | 1036 |
| 11:01 | 01:02 | 54:01 | 13:12                    | 03:01 | 0.01 | 1036 |
| 11:01 | 01:02 | 54:01 | 14:03                    | 03:01 | 0.01 | 1036 |
| 11:01 | 01:02 | 54:01 | 14:05                    | 05:03 | 0.05 | 286  |
| 11:01 | 01:02 | 54:01 | 14:54                    | 05:02 | 0.01 | 1036 |

|       |       |       |           |       |      |      |
|-------|-------|-------|-----------|-------|------|------|
| 11:01 | 01:02 | 54:01 | 15:01     | 05:02 | 0.01 | 1036 |
| 11:01 | 01:02 | 54:01 | 15:01     | 06:01 | 0.02 | 572  |
| 11:01 | 01:02 | 54:01 | 15:01     | 06:02 | 0.01 | 1036 |
| 11:01 | 01:02 | 54:01 | 15:01     | 06:09 | 0.01 | 1036 |
| 11:01 | 01:02 | 54:01 | 16:02     | 05:02 | 0.01 | 1036 |
| 11:01 | 01:02 | 55:02 | 04:03     | 03:02 | 0.02 | 572  |
| 11:01 | 01:02 | 55:02 | 04:05     | 03:03 | 0.01 | 1036 |
| 11:01 | 01:02 | 55:02 | 04:05     | 04:01 | 0.23 | 37   |
| 11:01 | 01:02 | 55:02 | 08:02     | 04:02 | 0.01 | 1036 |
| 11:01 | 01:02 | 55:02 | 08:03     | 06:01 | 0.06 | 218  |
| 11:01 | 01:02 | 55:02 | 09:01     | 03:03 | 0.07 | 177  |
| 11:01 | 01:02 | 55:02 | 11:01     | 03:01 | 0.05 | 286  |
| 11:01 | 01:02 | 55:02 | 12:02     | 03:01 | 0.10 | 115  |
| 11:01 | 01:02 | 55:02 | 13:07     | 03:01 | 0.01 | 1036 |
| 11:01 | 01:02 | 55:02 | 14:05     | 05:03 | 0.05 | 286  |
| 11:01 | 01:02 | 55:02 | 14:54     | 05:03 | 0.02 | 572  |
| 11:01 | 01:02 | 55:02 | 15:01     | 05:03 | 0.02 | 572  |
| 11:01 | 01:02 | 55:02 | 15:01     | 06:01 | 0.01 | 1036 |
| 11:01 | 01:02 | 55:02 | 15:01     | 06:02 | 0.01 | 1036 |
| 11:01 | 01:02 | 55:02 | 12:01:01G | 03:01 | 0.01 | 1036 |
| 11:01 | 01:02 | 55:12 | 04:05     | 04:01 | 0.01 | 1036 |
| 11:01 | 01:02 | 55:12 | 04:10     | 04:02 | 0.01 | 1036 |
| 11:01 | 01:02 | 56:01 | 08:03     | 06:01 | 0.02 | 572  |
| 11:01 | 01:02 | 56:01 | 09:01     | 03:03 | 0.01 | 1036 |
| 11:01 | 01:02 | 56:01 | 13:12     | 03:01 | 0.05 | 286  |
| 11:01 | 01:02 | 56:01 | 16:02     | 05:02 | 0.01 | 1036 |
| 11:01 | 01:02 | 56:03 | 08:02     | 04:02 | 0.01 | 1036 |
| 11:01 | 01:02 | 56:03 | 09:01     | 03:03 | 0.02 | 572  |
| 11:01 | 01:02 | 56:03 | 14:05     | 05:03 | 0.01 | 1036 |
| 11:01 | 01:02 | 56:03 | 12:01:01G | 03:01 | 0.01 | 1036 |
| 11:01 | 01:02 | 56:04 | 14:04     | 05:03 | 0.01 | 1036 |
| 11:01 | 01:02 | 56:04 | 12:01:01G | 03:01 | 0.01 | 1036 |
| 11:01 | 01:02 | 59:01 | 04:05     | 04:01 | 0.02 | 572  |
| 11:01 | 01:02 | 59:01 | 07:01     | 02:02 | 0.01 | 1036 |
| 11:01 | 01:02 | 59:01 | 08:03     | 06:01 | 0.01 | 1036 |
| 11:01 | 01:02 | 59:01 | 09:01     | 03:03 | 0.02 | 572  |
| 11:01 | 01:02 | 59:01 | 11:01     | 03:01 | 0.01 | 1036 |
| 11:01 | 01:02 | 59:01 | 12:01     | 03:01 | 0.01 | 1036 |
| 11:01 | 01:02 | 59:01 | 12:02     | 03:01 | 0.09 | 130  |
| 11:01 | 01:03 | 46:01 | 08:02     | 04:02 | 0.01 | 1036 |
| 11:01 | 01:03 | 46:01 | 09:01     | 03:03 | 0.02 | 572  |
| 11:01 | 01:03 | 46:01 | 12:02     | 03:01 | 0.01 | 1036 |
| 11:01 | 01:06 | 55:02 | 09:01     | 03:03 | 0.01 | 1036 |
| 11:01 | 02:02 | 27:05 | 01:01     | 05:01 | 0.01 | 1036 |
| 11:01 | 02:02 | 27:05 | 04:04     | 03:02 | 0.02 | 572  |
| 11:01 | 02:02 | 27:05 | 11:01     | 03:01 | 0.01 | 1036 |
| 11:01 | 02:02 | 27:05 | 14:07     | 05:03 | 0.01 | 1036 |
| 11:01 | 02:02 | 27:05 | 15:01     | 06:02 | 0.01 | 1036 |
| 11:01 | 02:02 | 27:05 | 12:01:01G | 03:01 | 0.01 | 1036 |
| 11:01 | 03:02 | 56:03 | 11:01     | 03:01 | 0.01 | 1036 |
| 11:01 | 03:02 | 58:01 | 01:01     | 05:01 | 0.02 | 572  |
| 11:01 | 03:02 | 58:01 | 03:01     | 02:01 | 0.12 | 97   |
| 11:01 | 03:02 | 58:01 | 07:01     | 02:02 | 0.01 | 1036 |
| 11:01 | 03:02 | 58:01 | 08:03     | 06:01 | 0.01 | 1036 |
| 11:01 | 03:02 | 58:01 | 11:01     | 03:01 | 0.01 | 1036 |
| 11:01 | 03:02 | 58:01 | 11:04     | 03:01 | 0.01 | 1036 |
| 11:01 | 03:02 | 58:01 | 13:02     | 06:09 | 0.05 | 286  |
| 11:01 | 03:03 | 13:01 | 12:02     | 03:01 | 0.01 | 1036 |
| 11:01 | 03:03 | 15:01 | 04:01     | 03:01 | 0.01 | 1036 |
| 11:01 | 03:03 | 15:01 | 04:04     | 03:02 | 0.05 | 286  |
| 11:01 | 03:03 | 15:01 | 04:05     | 04:01 | 0.01 | 1036 |
| 11:01 | 03:03 | 15:01 | 04:06     | 03:02 | 0.01 | 1036 |
| 11:01 | 03:03 | 15:01 | 08:02     | 04:02 | 0.01 | 1036 |

|       |       |       |                          |       |      |      |
|-------|-------|-------|--------------------------|-------|------|------|
| 11:01 | 03:03 | 15:01 | 08:03                    | 06:01 | 0.01 | 1036 |
| 11:01 | 03:03 | 15:01 | 09:01                    | 03:03 | 0.02 | 572  |
| 11:01 | 03:03 | 15:01 | 10:01                    | 05:01 | 0.01 | 1036 |
| 11:01 | 03:03 | 15:01 | 11:01                    | 03:01 | 0.01 | 1036 |
| 11:01 | 03:03 | 15:01 | 12:02                    | 03:01 | 0.02 | 572  |
| 11:01 | 03:03 | 15:01 | 14:05                    | 05:03 | 0.02 | 572  |
| 11:01 | 03:03 | 15:01 | 15:01                    | 06:02 | 0.07 | 177  |
| 11:01 | 03:03 | 15:01 | 12:01:01G                | 03:01 | 0.05 | 286  |
| 11:01 | 03:03 | 15:07 | 09:01                    | 03:03 | 0.01 | 1036 |
| 11:01 | 03:03 | 15:07 | 11:01                    | 04:02 | 0.01 | 1036 |
| 11:01 | 03:03 | 15:07 | 12:01:01G                | 03:01 | 0.01 | 1036 |
| 11:01 | 03:03 | 15:11 | 03:01                    | 02:01 | 0.01 | 1036 |
| 11:01 | 03:03 | 15:11 | 04:05                    | 04:01 | 0.01 | 1036 |
| 11:01 | 03:03 | 15:11 | 08:03                    | 06:01 | 0.02 | 572  |
| 11:01 | 03:03 | 15:11 | 09:01                    | 03:03 | 0.03 | 409  |
| 11:01 | 03:03 | 15:11 | 11:01                    | 03:01 | 0.01 | 1036 |
| 11:01 | 03:03 | 15:11 | 12:02                    | 03:01 | 0.02 | 572  |
| 11:01 | 03:03 | 15:11 | 15:01                    | 05:03 | 0.01 | 1036 |
| 11:01 | 03:03 | 15:11 | 15:01                    | 06:02 | 0.02 | 572  |
| 11:01 | 03:03 | 15:11 | 16:02                    | 05:02 | 0.02 | 572  |
| 11:01 | 03:03 | 15:11 | 12:01:01G(2)<br>12:01(1) | 03:01 | 0.03 | 409  |
| 11:01 | 03:03 | 15:12 | 12:02                    | 03:01 | 0.01 | 1036 |
| 11:01 | 03:03 | 27:04 | 09:01                    | 03:03 | 0.01 | 1036 |
| 11:01 | 03:03 | 35:01 | 04:03                    | 03:02 | 0.01 | 1036 |
| 11:01 | 03:03 | 35:01 | 04:05                    | 04:01 | 0.03 | 409  |
| 11:01 | 03:03 | 35:01 | 04:06                    | 03:02 | 0.01 | 1036 |
| 11:01 | 03:03 | 35:01 | 08:03                    | 06:01 | 0.01 | 1036 |
| 11:01 | 03:03 | 35:01 | 09:01                    | 03:03 | 0.08 | 151  |
| 11:01 | 03:03 | 35:01 | 11:01                    | 03:01 | 0.05 | 286  |
| 11:01 | 03:03 | 35:01 | 12:01                    | 03:03 | 0.01 | 1036 |
| 11:01 | 03:03 | 35:01 | 12:02                    | 03:01 | 0.01 | 1036 |
| 11:01 | 03:03 | 35:01 | 11:101                   | 03:01 | 0.01 | 1036 |
| 11:01 | 03:03 | 35:01 | 15:01                    | 03:01 | 0.01 | 1036 |
| 11:01 | 03:03 | 35:01 | 15:01                    | 06:02 | 0.07 | 177  |
| 11:01 | 03:03 | 40:01 | 08:03                    | 06:01 | 0.01 | 1036 |
| 11:01 | 03:03 | 40:01 | 09:01                    | 03:03 | 0.01 | 1036 |
| 11:01 | 03:03 | 40:01 | 15:01                    | 03:01 | 0.01 | 1036 |
| 11:01 | 03:03 | 40:02 | 08:03                    | 06:01 | 0.01 | 1036 |
| 11:01 | 03:03 | 40:02 | 11:01                    | 03:01 | 0.01 | 1036 |
| 11:01 | 03:03 | 40:02 | 12:01                    | 03:01 | 0.03 | 409  |
| 11:01 | 03:03 | 40:02 | 14:54                    | 05:03 | 0.01 | 1036 |
| 11:01 | 03:03 | 40:02 | 15:01                    | 06:02 | 0.01 | 1036 |
| 11:01 | 03:03 | 40:02 | 12:01:01G                | 05:03 | 0.02 | 572  |
| 11:01 | 03:03 | 46:01 | 09:01                    | 03:03 | 0.01 | 1036 |
| 11:01 | 03:03 | 48:01 | 14:54                    | 05:03 | 0.01 | 1036 |
| 11:01 | 03:03 | 55:01 | 07:01                    | 03:03 | 0.01 | 1036 |
| 11:01 | 03:03 | 55:02 | 04:04                    | 03:02 | 0.01 | 1036 |
| 11:01 | 03:03 | 55:02 | 04:05                    | 04:01 | 0.01 | 1036 |
| 11:01 | 03:03 | 55:02 | 11:01                    | 03:01 | 0.01 | 1036 |
| 11:01 | 03:03 | 55:02 | 12:01                    | 03:01 | 0.01 | 1036 |
| 11:01 | 03:03 | 55:02 | 14:54                    | 05:02 | 0.01 | 1036 |
| 11:01 | 03:03 | 55:02 | 15:01                    | 06:02 | 0.01 | 1036 |
| 11:01 | 03:03 | 55:02 | 15:02                    | 05:02 | 0.01 | 1036 |
| 11:01 | 03:03 | 55:04 | 15:01                    | 06:02 | 0.01 | 1036 |
| 11:01 | 03:03 | 57:01 | 07:01                    | 03:03 | 0.01 | 1036 |
| 11:01 | 03:04 | 07:02 | 15:01                    | 06:02 | 0.01 | 1036 |
| 11:01 | 03:04 | 13:01 | 03:01                    | 02:01 | 0.01 | 1036 |
| 11:01 | 03:04 | 13:01 | 04:01                    | 03:01 | 0.01 | 1036 |
| 11:01 | 03:04 | 13:01 | 04:03                    | 03:02 | 0.02 | 572  |
| 11:01 | 03:04 | 13:01 | 04:04                    | 03:02 | 0.02 | 572  |
| 11:01 | 03:04 | 13:01 | 04:05                    | 04:01 | 0.03 | 409  |
| 11:01 | 03:04 | 13:01 | 04:06                    | 03:02 | 0.01 | 1036 |

|       |       |           |              |        |      |      |
|-------|-------|-----------|--------------|--------|------|------|
| 11:01 | 03:04 | 13:01     | 04:07        | 03:02  | 0.01 | 1036 |
| 11:01 | 03:04 | 13:01     | 08:03        | 06:01  | 0.06 | 218  |
| 11:01 | 03:04 | 13:01     | 09:01        | 03:02  | 0.02 | 572  |
| 11:01 | 03:04 | 13:01     | 09:01        | 03:03  | 0.06 | 218  |
| 11:01 | 03:04 | 13:01     | 11:01        | 03:01  | 0.01 | 1036 |
| 11:01 | 03:04 | 13:01     | 11:01        | 03:02  | 0.01 | 1036 |
| 11:01 | 03:04 | 13:01     | 12:01        | 03:01  | 0.01 | 1036 |
| 11:01 | 03:04 | 13:01     | 12:01        | 03:03  | 0.01 | 1036 |
| 11:01 | 03:04 | 13:01     | 12:02        | 03:01  | 0.31 | 26   |
| 11:01 | 03:04 | 13:01     | 13:12        | 03:01  | 0.01 | 1036 |
| 11:01 | 03:04 | 13:01     | 14:04        | 05:03  | 0.01 | 1036 |
| 11:01 | 03:04 | 13:01     | 14:05        | 05:03  | 0.02 | 572  |
| 11:01 | 03:04 | 13:01     | 15:01        | 05:02  | 0.03 | 409  |
| 11:01 | 03:04 | 13:01     | 15:01        | 05:03  | 0.01 | 1036 |
| 11:01 | 03:04 | 13:01     | 15:01        | 06:01  | 0.58 | 11   |
| 11:01 | 03:04 | 13:01     | 15:01        | 06:02  | 0.06 | 218  |
| 11:01 | 03:04 | 13:01     | 15:01        | 06:10  | 0.02 | 572  |
| 11:01 | 03:04 | 13:01     | 15:02        | 05:01  | 0.01 | 1036 |
| 11:01 | 03:04 | 13:01     | 15:02        | 06:02  | 0.06 | 218  |
| 11:01 | 03:04 | 13:01     | 16:02        | 05:02  | 0.19 | 50   |
| 11:01 | 03:04 | 13:01     | 16:35        | 05:02  | 0.01 | 1036 |
| 11:01 | 03:04 | 13:02     | 12:02        | 03:01  | 0.01 | 1036 |
| 11:01 | 03:04 | 15:01     | 09:01        | 03:03  | 0.03 | 409  |
| 11:01 | 03:04 | 15:01     | 14:54        | 05:03  | 0.01 | 1036 |
| 11:01 | 03:04 | 27:04     | 12:02        | 03:01  | 0.01 | 1036 |
| 11:01 | 03:04 | 27:06     | 12:02        | 03:01  | 0.01 | 1036 |
| 11:01 | 03:04 | 38:02     | 08:03        | 06:01  | 0.01 | 1036 |
| 11:01 | 03:04 | 39:01     | 09:01        | 03:03  | 0.01 | 1036 |
| 11:01 | 03:04 | 40:01     | 03:01        | 02:01  | 0.01 | 1036 |
| 11:01 | 03:04 | 40:01     | 04:05        | 04:01  | 0.12 | 97   |
| 11:01 | 03:04 | 40:01     | 04:06        | 03:02  | 0.03 | 409  |
| 11:01 | 03:04 | 40:01     | 08:03        | 06:01  | 0.03 | 409  |
| 11:01 | 03:04 | 40:01     | 09:01        | 03:03  | 0.13 | 85   |
| 11:01 | 03:04 | 40:01     | 11:01        | 03:01  | 0.13 | 85   |
| 11:01 | 03:04 | 40:01     | 11:01        | 03:147 | 0.01 | 1036 |
| 11:01 | 03:04 | 40:01     | 12:02        | 03:01  | 0.05 | 286  |
| 11:01 | 03:04 | 40:01     | 13:12        | 03:01  | 0.01 | 1036 |
| 11:01 | 03:04 | 40:01     | 14:05        | 05:03  | 0.01 | 1036 |
| 11:01 | 03:04 | 40:01     | 14:54        | 05:03  | 0.02 | 572  |
| 11:01 | 03:04 | 40:01     | 15:01        | 05:02  | 0.01 | 1036 |
| 11:01 | 03:04 | 40:01     | 15:01        | 05:03  | 0.03 | 409  |
| 11:01 | 03:04 | 40:01     | 15:01        | 06:02  | 0.07 | 177  |
| 11:01 | 03:04 | 40:01     | 16:02        | 05:02  | 0.05 | 286  |
| 11:01 | 03:04 | 40:01     | 12:01:01G(1) | 03:01  | 0.02 | 572  |
| 11:01 | 03:04 | 40:02     | 12:01(1)     | 03:02  | 0.02 | 572  |
| 11:01 | 03:04 | 40:02     | 04:03        | 03:02  | 0.02 | 572  |
| 11:01 | 03:04 | 40:02     | 09:01        | 03:03  | 0.01 | 1036 |
| 11:01 | 03:04 | 40:02     | 11:01        | 03:01  | 0.06 | 218  |
| 11:01 | 03:04 | 40:02     | 11:06        | 03:01  | 0.01 | 1036 |
| 11:01 | 03:04 | 40:02     | 15:01        | 05:03  | 0.01 | 1036 |
| 11:01 | 03:04 | 40:02     | 16:02        | 05:02  | 0.01 | 1036 |
| 11:01 | 03:04 | 40:03     | 11:01        | 03:01  | 0.01 | 1036 |
| 11:01 | 03:04 | 40:03     | 14:05        | 05:03  | 0.01 | 1036 |
| 11:01 | 03:04 | 40:06     | 09:01        | 03:03  | 0.02 | 572  |
| 11:01 | 03:04 | 40:06     | 12:01        | 03:01  | 0.01 | 1036 |
| 11:01 | 03:04 | 46:01     | 04:05        | 04:01  | 0.01 | 1036 |
| 11:01 | 03:04 | 46:01     | 08:03        | 06:01  | 0.01 | 1036 |
| 11:01 | 03:04 | 46:01     | 09:01        | 03:03  | 0.02 | 572  |
| 11:01 | 03:04 | 55:02     | 15:01        | 06:02  | 0.01 | 1036 |
| 11:01 | 03:04 | 40:40:01G | 09:01        | 03:03  | 0.01 | 1036 |
| 11:01 | 04:01 | 15:01     | 04:03        | 03:02  | 0.02 | 572  |
| 11:01 | 04:01 | 15:01     | 04:05        | 04:01  | 0.01 | 1036 |
| 11:01 | 04:01 | 15:01     | 04:06        | 03:02  | 0.86 | 8    |



|       |        |       |                       |       |      |      |
|-------|--------|-------|-----------------------|-------|------|------|
| 11:01 | 04:01  | 15:01 | 08:03                 | 06:01 | 0.06 | 218  |
| 11:01 | 04:01  | 15:01 | 09:01                 | 03:03 | 0.05 | 286  |
| 11:01 | 04:01  | 15:01 | 11:01                 | 03:01 | 0.02 | 572  |
| 11:01 | 04:01  | 15:01 | 11:04                 | 03:01 | 0.01 | 1036 |
| 11:01 | 04:01  | 15:01 | 12:01                 | 03:01 | 0.01 | 1036 |
| 11:01 | 04:01  | 15:01 | 12:02                 | 03:01 | 0.03 | 409  |
| 11:01 | 04:01  | 15:01 | 13:12                 | 03:01 | 0.01 | 1036 |
| 11:01 | 04:01  | 15:01 | 14:05                 | 05:03 | 0.01 | 1036 |
| 11:01 | 04:01  | 15:01 | 15:01                 | 05:02 | 0.01 | 1036 |
| 11:01 | 04:01  | 15:01 | 15:01                 | 06:01 | 0.01 | 1036 |
| 11:01 | 04:01  | 15:01 | 15:01                 | 06:02 | 0.03 | 409  |
| 11:01 | 04:01  | 15:01 | 16:02                 | 05:02 | 0.01 | 1036 |
| 11:01 | 04:01  | 15:05 | 04:06                 | 03:02 | 0.07 | 177  |
| 11:01 | 04:01  | 15:05 | 11:01                 | 03:01 | 0.01 | 1036 |
| 11:01 | 04:01  | 15:05 | 12:02                 | 03:01 | 0.01 | 1036 |
| 11:01 | 04:01  | 15:27 | 04:06                 | 03:02 | 0.07 | 177  |
| 11:01 | 04:01  | 15:27 | 15:01                 | 06:02 | 0.01 | 1036 |
| 11:01 | 04:01  | 35:02 | 11:04                 | 03:01 | 0.01 | 1036 |
| 11:01 | 04:01  | 35:03 | 14:04                 | 05:03 | 0.01 | 1036 |
| 11:01 | 04:01  | 35:05 | 12:02                 | 03:01 | 0.01 | 1036 |
| 11:01 | 04:01  | 40:01 | 14:54                 | 05:03 | 0.01 | 1036 |
| 11:01 | 04:01  | 44:03 | 03:01                 | 02:01 | 0.01 | 1036 |
| 11:01 | 04:01  | 44:03 | 04:05                 | 04:01 | 0.01 | 1036 |
| 11:01 | 04:01  | 44:03 | 07:01                 | 02:02 | 0.01 | 1036 |
| 11:01 | 04:01  | 46:01 | 09:01                 | 03:03 | 0.01 | 1036 |
| 11:01 | 04:03  | 15:12 | 15:02                 | 05:02 | 0.02 | 572  |
| 11:01 | 04:03  | 15:25 | 12:01                 | 03:01 | 0.01 | 1036 |
| 11:01 | 04:03  | 15:25 | 12:02                 | 03:01 | 0.01 | 1036 |
| 11:01 | 04:03  | 15:25 | 15:02                 | 05:01 | 0.01 | 1036 |
| 11:01 | 04:03  | 15:25 | 11:06(1)<br>11:129(1) | 03:01 | 0.02 | 572  |
| 11:01 | 04:03  | 39:01 | 11:01                 | 03:01 | 0.01 | 1036 |
| 11:01 | 04:03  | 55:02 | 16:02                 | 05:02 | 0.02 | 572  |
| 11:01 | 03:118 | 40:01 | 16:02                 | 05:02 | 0.01 | 1036 |
| 11:01 | 05:01  | 07:02 | 13:02                 | 06:04 | 0.01 | 1036 |
| 11:01 | 05:01  | 44:02 | 11:04                 | 03:01 | 0.01 | 1036 |
| 11:01 | 05:01  | 44:02 | 13:01                 | 06:03 | 0.01 | 1036 |
| 11:01 | 05:01  | 44:02 | 12:01:01G             | 03:01 | 0.01 | 1036 |
| 11:01 | 05:01  | 57:01 | 07:01                 | 03:03 | 0.01 | 1036 |
| 11:01 | 04:82  | 40:01 | 04:03                 | 03:02 | 0.02 | 572  |
| 11:01 | 04:82  | 40:01 | 08:03                 | 06:01 | 0.01 | 1036 |
| 11:01 | 06:02  | 13:02 | 07:01                 | 02:02 | 0.21 | 44   |
| 11:01 | 06:02  | 13:02 | 11:01                 | 03:01 | 0.01 | 1036 |
| 11:01 | 06:02  | 13:02 | 15:01                 | 06:02 | 0.01 | 1036 |
| 11:01 | 06:02  | 45:01 | 15:01                 | 06:02 | 0.01 | 1036 |
| 11:01 | 06:02  | 50:01 | 07:01                 | 02:02 | 0.02 | 572  |
| 11:01 | 06:02  | 57:01 | 04:05                 | 04:01 | 0.01 | 1036 |
| 11:01 | 06:02  | 57:01 | 07:01                 | 03:03 | 0.02 | 572  |
| 11:01 | 07:01  | 15:17 | 13:02                 | 06:04 | 0.01 | 1036 |
| 11:01 | 07:01  | 18:01 | 14:04                 | 05:03 | 0.01 | 1036 |
| 11:01 | 07:02  | 07:02 | 01:01                 | 05:01 | 0.14 | 76   |
| 11:01 | 07:02  | 07:02 | 07:01                 | 02:02 | 0.01 | 1036 |
| 11:01 | 07:02  | 07:02 | 15:01                 | 06:02 | 0.06 | 218  |
| 11:01 | 07:02  | 07:06 | 11:01                 | 03:01 | 0.01 | 1036 |
| 11:01 | 07:02  | 08:01 | 03:01                 | 02:01 | 0.02 | 572  |
| 11:01 | 07:02  | 13:01 | 11:01                 | 03:01 | 0.01 | 1036 |
| 11:01 | 07:02  | 13:01 | 12:02                 | 03:01 | 0.07 | 177  |
| 11:01 | 07:02  | 13:01 | 15:01                 | 06:01 | 0.01 | 1036 |
| 11:01 | 07:02  | 13:01 | 15:02                 | 06:02 | 0.01 | 1036 |
| 11:01 | 07:02  | 15:01 | 12:02                 | 03:01 | 0.01 | 1036 |
| 11:01 | 07:02  | 15:01 | 14:54                 | 05:03 | 0.01 | 1036 |
| 11:01 | 07:02  | 15:25 | 12:02                 | 03:01 | 0.01 | 1036 |
| 11:01 | 07:02  | 15:25 | 15:01                 | 06:02 | 0.01 | 1036 |

|       |       |       |                       |       |      |      |
|-------|-------|-------|-----------------------|-------|------|------|
| 11:01 | 07:02 | 35:01 | 15:01                 | 06:02 | 0.01 | 1036 |
| 11:01 | 07:02 | 38:02 | 03:01                 | 02:01 | 0.01 | 1036 |
| 11:01 | 07:02 | 38:02 | 04:05                 | 03:02 | 0.01 | 1036 |
| 11:01 | 07:02 | 38:02 | 07:01                 | 02:02 | 0.01 | 1036 |
| 11:01 | 07:02 | 38:02 | 08:03                 | 06:01 | 0.12 | 97   |
| 11:01 | 07:02 | 38:02 | 11:01                 | 03:01 | 0.02 | 572  |
| 11:01 | 07:02 | 38:02 | 12:02                 | 03:01 | 0.12 | 97   |
| 11:01 | 07:02 | 38:02 | 12:02                 | 05:02 | 0.01 | 1036 |
| 11:01 | 07:02 | 38:02 | 13:12                 | 03:01 | 0.01 | 1036 |
| 11:01 | 07:02 | 38:02 | 14:54                 | 04:01 | 0.02 | 572  |
| 11:01 | 07:02 | 38:02 | 15:01                 | 06:02 | 0.01 | 1036 |
| 11:01 | 07:02 | 38:02 | 15:02                 | 05:01 | 0.08 | 151  |
| 11:01 | 07:02 | 38:02 | 16:02                 | 03:01 | 0.01 | 1036 |
| 11:01 | 07:02 | 38:02 | 16:02                 | 05:02 | 0.01 | 1036 |
| 11:01 | 07:02 | 38:15 | 08:03                 | 06:01 | 0.01 | 1036 |
| 11:01 | 07:02 | 39:01 | 04:05                 | 04:01 | 0.01 | 1036 |
| 11:01 | 07:02 | 39:01 | 08:03                 | 06:01 | 0.21 | 44   |
| 11:01 | 07:02 | 39:01 | 09:01                 | 03:03 | 0.10 | 115  |
| 11:01 | 07:02 | 39:01 | 11:01                 | 03:01 | 0.01 | 1036 |
| 11:01 | 07:02 | 39:01 | 11:06                 | 03:01 | 0.01 | 1036 |
| 11:01 | 07:02 | 39:01 | 12:01                 | 04:02 | 0.01 | 1036 |
| 11:01 | 07:02 | 39:01 | 12:02                 | 03:01 | 0.03 | 409  |
| 11:01 | 07:02 | 39:01 | 13:12                 | 03:01 | 0.02 | 572  |
| 11:01 | 07:02 | 39:01 | 14:05                 | 05:03 | 0.01 | 1036 |
| 11:01 | 07:02 | 39:01 | 14:54                 | 05:02 | 0.02 | 572  |
| 11:01 | 07:02 | 39:01 | 15:01                 | 05:02 | 0.01 | 1036 |
| 11:01 | 07:02 | 39:01 | 15:01                 | 06:01 | 0.01 | 1036 |
| 11:01 | 07:02 | 39:01 | 15:01                 | 06:02 | 0.01 | 1036 |
| 11:01 | 07:02 | 39:01 | 16:02                 | 05:02 | 0.02 | 572  |
| 11:01 | 07:02 | 39:05 | 08:03                 | 06:01 | 0.12 | 97   |
| 11:01 | 07:02 | 39:05 | 09:01                 | 03:03 | 0.01 | 1036 |
| 11:01 | 07:02 | 39:05 | 10:01                 | 05:01 | 0.01 | 1036 |
| 11:01 | 07:02 | 39:05 | 14:54                 | 05:03 | 0.08 | 151  |
| 11:01 | 07:02 | 40:01 | 03:01                 | 02:01 | 0.02 | 572  |
| 11:01 | 07:02 | 40:01 | 04:01                 | 03:01 | 0.01 | 1036 |
| 11:01 | 07:02 | 40:01 | 04:03                 | 03:02 | 0.02 | 572  |
| 11:01 | 07:02 | 40:01 | 04:04                 | 03:02 | 0.06 | 218  |
| 11:01 | 07:02 | 40:01 | 04:05                 | 03:01 | 0.01 | 1036 |
| 11:01 | 07:02 | 40:01 | 04:05                 | 03:02 | 0.01 | 1036 |
| 11:01 | 07:02 | 40:01 | 04:05                 | 04:01 | 0.22 | 42   |
| 11:01 | 07:02 | 40:01 | 04:06                 | 03:02 | 0.06 | 218  |
| 11:01 | 07:02 | 40:01 | 08:02                 | 04:02 | 0.02 | 572  |
| 11:01 | 07:02 | 40:01 | 08:03                 | 06:01 | 0.48 | 14   |
| 11:01 | 07:02 | 40:01 | 08:09                 | 04:02 | 0.03 | 409  |
| 11:01 | 07:02 | 40:01 | 09:01                 | 03:03 | 0.45 | 17   |
| 11:01 | 07:02 | 40:01 | 10:01                 | 05:01 | 0.01 | 1036 |
| 11:01 | 07:02 | 40:01 | 11:01                 | 03:01 | 0.23 | 37   |
| 11:01 | 07:02 | 40:01 | 12:02                 | 03:01 | 0.15 | 64   |
| 11:01 | 07:02 | 40:01 | 13:07                 | 03:01 | 0.01 | 1036 |
| 11:01 | 07:02 | 40:01 | 13:12                 | 03:01 | 0.03 | 409  |
| 11:01 | 07:02 | 40:01 | 14:03                 | 03:01 | 0.01 | 1036 |
| 11:01 | 07:02 | 40:01 | 14:05                 | 05:03 | 0.07 | 177  |
| 11:01 | 07:02 | 40:01 | 14:54                 | 05:02 | 0.07 | 177  |
| 11:01 | 07:02 | 40:01 | 14:54                 | 05:03 | 0.01 | 1036 |
| 11:01 | 07:02 | 40:01 | 15:01                 | 05:02 | 0.07 | 177  |
| 11:01 | 07:02 | 40:01 | 15:01                 | 06:01 | 0.03 | 409  |
| 11:01 | 07:02 | 40:01 | 15:01                 | 06:02 | 0.15 | 64   |
| 11:01 | 07:02 | 40:01 | 15:02                 | 05:02 | 0.01 | 1036 |
| 11:01 | 07:02 | 40:01 | 16:02                 | 05:02 | 0.05 | 286  |
| 11:01 | 07:02 | 40:01 | 12:01(17)<br>12:10(1) | 03:01 | 0.21 | 44   |
| 11:01 | 07:02 | 40:01 | 12:01:01G             | 03:02 | 0.01 | 1036 |
| 11:01 | 07:02 | 40:02 | 08:03                 | 06:01 | 0.06 | 218  |

|       |       |        |           |       |      |      |
|-------|-------|--------|-----------|-------|------|------|
| 11:01 | 07:02 | 40:02  | 09:01     | 03:03 | 0.01 | 1036 |
| 11:01 | 07:02 | 40:02  | 12:02     | 03:01 | 0.01 | 1036 |
| 11:01 | 07:02 | 52:01  | 12:02     | 03:01 | 0.03 | 409  |
| 11:01 | 07:02 | 52:01  | 12:02     | 05:02 | 0.02 | 572  |
| 11:01 | 07:02 | 52:01  | 14:04     | 05:03 | 0.01 | 1036 |
| 11:01 | 07:02 | 52:01  | 14:10     | 05:10 | 0.01 | 1036 |
| 11:01 | 07:02 | 52:01  | 14:54     | 05:02 | 0.01 | 1036 |
| 11:01 | 07:02 | 54:01  | 04:05     | 04:01 | 0.02 | 572  |
| 11:01 | 07:02 | 54:01  | 11:01     | 03:01 | 0.01 | 1036 |
| 11:01 | 07:02 | 54:01  | 12:02     | 03:01 | 0.01 | 1036 |
| 11:01 | 07:02 | 54:01  | 14:05     | 05:03 | 0.01 | 1036 |
| 11:01 | 07:02 | 55:02  | 04:05     | 04:01 | 0.02 | 572  |
| 11:01 | 07:02 | 55:02  | 09:01     | 03:03 | 0.01 | 1036 |
| 11:01 | 07:02 | 55:02  | 12:02     | 03:01 | 0.02 | 572  |
| 11:01 | 07:02 | 56:01  | 09:01     | 03:03 | 0.02 | 572  |
| 11:01 | 07:02 | 67:01  | 08:03     | 06:01 | 0.02 | 572  |
| 11:01 | 07:02 | 67:01  | 11:01     | 03:01 | 0.01 | 1036 |
| 11:01 | 07:02 | 67:01  | 12:10     | 03:01 | 0.02 | 572  |
| 11:01 | 07:02 | 40:150 | 04:05     | 04:01 | 0.01 | 1036 |
| 11:01 | 07:04 | 15:18  | 04:01     | 03:01 | 0.02 | 572  |
| 11:01 | 07:04 | 15:18  | 04:01     | 03:02 | 0.01 | 1036 |
| 11:01 | 07:04 | 18:01  | 09:01     | 03:03 | 0.02 | 572  |
| 11:01 | 07:04 | 18:01  | 12:02     | 03:01 | 0.01 | 1036 |
| 11:01 | 07:04 | 18:01  | 12:02     | 05:02 | 0.01 | 1036 |
| 11:01 | 07:04 | 18:01  | 14:04     | 05:03 | 0.01 | 1036 |
| 11:01 | 07:06 | 44:03  | 07:01     | 02:02 | 0.02 | 572  |
| 11:01 | 07:26 | 15:25  | 15:01     | 06:01 | 0.01 | 1036 |
| 11:01 | 07:29 | 40:01  | 14:07     | 05:03 | 0.01 | 1036 |
| 11:01 | 08:01 | 13:01  | 12:02     | 03:01 | 0.02 | 572  |
| 11:01 | 08:01 | 13:01  | 15:01     | 06:01 | 0.01 | 1036 |
| 11:01 | 08:01 | 15:01  | 07:01     | 03:03 | 0.01 | 1036 |
| 11:01 | 08:01 | 15:01  | 09:01     | 03:03 | 0.01 | 1036 |
| 11:01 | 08:01 | 15:02  | 04:03     | 03:02 | 0.01 | 1036 |
| 11:01 | 08:01 | 15:02  | 04:04     | 03:02 | 0.01 | 1036 |
| 11:01 | 08:01 | 15:02  | 04:05     | 04:01 | 0.06 | 218  |
| 11:01 | 08:01 | 15:02  | 04:06     | 03:02 | 0.01 | 1036 |
| 11:01 | 08:01 | 15:02  | 08:03     | 06:01 | 0.02 | 572  |
| 11:01 | 08:01 | 15:02  | 09:01     | 03:03 | 0.06 | 218  |
| 11:01 | 08:01 | 15:02  | 11:01     | 03:01 | 0.01 | 1036 |
| 11:01 | 08:01 | 15:02  | 12:02     | 03:01 | 1.30 | 5    |
| 11:01 | 08:01 | 15:02  | 12:02     | 03:03 | 0.01 | 1036 |
| 11:01 | 08:01 | 15:02  | 12:02     | 05:02 | 0.01 | 1036 |
| 11:01 | 08:01 | 15:02  | 12:02     | 06:02 | 0.01 | 1036 |
| 11:01 | 08:01 | 15:02  | 13:12     | 03:01 | 0.13 | 85   |
| 11:01 | 08:01 | 15:02  | 15:01     | 06:01 | 0.30 | 30   |
| 11:01 | 08:01 | 15:02  | 15:01     | 06:02 | 0.03 | 409  |
| 11:01 | 08:01 | 15:02  | 15:02     | 05:02 | 0.01 | 1036 |
| 11:01 | 08:01 | 15:02  | 16:02     | 05:02 | 0.02 | 572  |
| 11:01 | 08:01 | 15:13  | 12:02     | 03:01 | 0.01 | 1036 |
| 11:01 | 08:01 | 15:18  | 04:03     | 03:02 | 0.01 | 1036 |
| 11:01 | 08:01 | 15:18  | 04:04     | 03:02 | 0.05 | 286  |
| 11:01 | 08:01 | 15:18  | 09:01     | 03:03 | 0.02 | 572  |
| 11:01 | 08:01 | 15:18  | 11:04     | 03:01 | 0.01 | 1036 |
| 11:01 | 08:01 | 15:18  | 14:05     | 05:03 | 0.01 | 1036 |
| 11:01 | 08:01 | 15:18  | 15:01     | 06:02 | 0.01 | 1036 |
| 11:01 | 08:01 | 27:04  | 12:02     | 03:01 | 0.01 | 1036 |
| 11:01 | 08:01 | 35:01  | 15:01     | 06:02 | 0.02 | 572  |
| 11:01 | 08:01 | 35:01  | 12:01:01G | 03:01 | 0.01 | 1036 |
| 11:01 | 08:01 | 40:01  | 07:01     | 02:02 | 0.01 | 1036 |
| 11:01 | 08:01 | 40:01  | 12:01     | 03:01 | 0.01 | 1036 |
| 11:01 | 08:01 | 40:01  | 12:02     | 03:01 | 0.01 | 1036 |
| 11:01 | 08:01 | 40:06  | 04:05     | 04:01 | 0.02 | 572  |
| 11:01 | 08:01 | 40:06  | 07:01     | 03:03 | 0.01 | 1036 |

|       |       |       |              |       |      |             |
|-------|-------|-------|--------------|-------|------|-------------|
| 11:01 | 08:01 | 40:06 | 08:03        | 06:01 | 0.01 | <b>1036</b> |
| 11:01 | 08:01 | 40:06 | 09:01        | 03:03 | 0.15 | <b>64</b>   |
| 11:01 | 08:01 | 40:06 | 12:02        | 03:01 | 0.05 | <b>286</b>  |
| 11:01 | 08:01 | 40:06 | 14:05        | 05:03 | 0.01 | <b>1036</b> |
| 11:01 | 08:01 | 40:06 | 15:01        | 06:02 | 0.06 | <b>218</b>  |
| 11:01 | 08:01 | 46:01 | 09:01        | 03:03 | 0.01 | <b>1036</b> |
| 11:01 | 08:01 | 48:01 | 09:01        | 03:03 | 0.01 | <b>1036</b> |
| 11:01 | 08:01 | 48:01 | 14:05        | 05:03 | 0.01 | <b>1036</b> |
| 11:01 | 08:01 | 48:01 | 12:01:01G(2) | 03:01 | 0.03 | <b>409</b>  |
| 11:01 | 08:01 | 48:03 | 12:01(1)     | 03:01 | 0.01 | <b>1036</b> |
| 11:01 | 08:01 | 55:02 | 08:03        | 06:01 | 0.01 | <b>1036</b> |
| 11:01 | 08:01 | 55:02 | 14:54        | 05:02 | 0.01 | <b>1036</b> |
| 11:01 | 08:02 | 14:02 | 01:02        | 05:01 | 0.01 | <b>1036</b> |
| 11:01 | 08:03 | 48:01 | 04:05        | 04:01 | 0.01 | <b>1036</b> |
| 11:01 | 08:03 | 48:01 | 04:10        | 04:02 | 0.01 | <b>1036</b> |
| 11:01 | 08:03 | 48:01 | 11:01        | 03:01 | 0.01 | <b>1036</b> |
| 11:01 | 08:03 | 48:01 | 12:01        | 03:01 | 0.01 | <b>1036</b> |
| 11:01 | 08:03 | 48:01 | 14:54        | 05:03 | 0.01 | <b>1036</b> |
| 11:01 | 08:03 | 48:01 | 15:01        | 03:01 | 0.02 | <b>572</b>  |
| 11:01 | 08:03 | 48:01 | 15:01        | 06:01 | 0.01 | <b>1036</b> |
| 11:01 | 07:66 | 40:01 | 12:02        | 03:01 | 0.03 | <b>409</b>  |
| 11:01 | 08:22 | 48:01 | 11:01        | 03:01 | 0.01 | <b>1036</b> |
| 11:01 | 08:22 | 51:01 | 07:01        | 02:02 | 0.01 | <b>1036</b> |
| 11:01 | 08:22 | 81:02 | 04:05        | 04:01 | 0.01 | <b>1036</b> |
| 11:01 | 12:02 | 13:01 | 15:01        | 06:01 | 0.01 | <b>1036</b> |
| 11:01 | 12:02 | 13:02 | 07:01        | 02:02 | 0.01 | <b>1036</b> |
| 11:01 | 12:02 | 15:07 | 12:02        | 03:01 | 0.02 | <b>572</b>  |
| 11:01 | 12:02 | 15:08 | 08:02        | 04:02 | 0.01 | <b>1036</b> |
| 11:01 | 12:02 | 27:04 | 09:01        | 03:03 | 0.02 | <b>572</b>  |
| 11:01 | 12:02 | 27:04 | 11:01        | 03:01 | 0.02 | <b>572</b>  |
| 11:01 | 12:02 | 27:04 | 12:02        | 03:01 | 0.05 | <b>286</b>  |
| 11:01 | 12:02 | 27:04 | 12:02        | 04:01 | 0.01 | <b>1036</b> |
| 11:01 | 12:02 | 27:04 | 14:54        | 05:03 | 0.01 | <b>1036</b> |
| 11:01 | 12:02 | 27:15 | 14:05        | 05:03 | 0.01 | <b>1036</b> |
| 11:01 | 12:02 | 52:01 | 01:01        | 05:01 | 0.02 | <b>572</b>  |
| 11:01 | 12:02 | 52:01 | 04:05        | 04:01 | 0.01 | <b>1036</b> |
| 11:01 | 12:02 | 52:01 | 09:01        | 03:03 | 0.01 | <b>1036</b> |
| 11:01 | 12:02 | 52:01 | 10:01        | 05:01 | 0.07 | <b>177</b>  |
| 11:01 | 12:02 | 52:01 | 11:01        | 03:01 | 0.05 | <b>286</b>  |
| 11:01 | 12:02 | 52:01 | 12:01        | 03:01 | 0.01 | <b>1036</b> |
| 11:01 | 12:02 | 52:01 | 15:02        | 06:01 | 0.15 | <b>64</b>   |
| 11:01 | 12:02 | 52:01 | 16:02        | 05:02 | 0.01 | <b>1036</b> |
| 11:01 | 12:03 | 15:32 | 13:02        | 06:04 | 0.01 | <b>1036</b> |
| 11:01 | 12:03 | 15:32 | 15:04        | 05:02 | 0.03 | <b>409</b>  |
| 11:01 | 12:03 | 35:03 | 13:01        | 06:03 | 0.01 | <b>1036</b> |
| 11:01 | 12:03 | 38:01 | 01:01        | 05:01 | 0.01 | <b>1036</b> |
| 11:01 | 12:03 | 55:02 | 04:03        | 03:02 | 0.01 | <b>1036</b> |
| 11:01 | 12:03 | 55:02 | 04:05        | 04:01 | 0.06 | <b>218</b>  |
| 11:01 | 12:03 | 55:02 | 08:03        | 06:01 | 0.01 | <b>1036</b> |
| 11:01 | 12:03 | 55:02 | 09:01        | 03:03 | 0.03 | <b>409</b>  |
| 11:01 | 12:03 | 55:02 | 11:01        | 03:01 | 0.02 | <b>572</b>  |
| 11:01 | 12:03 | 55:02 | 12:02        | 03:01 | 0.01 | <b>1036</b> |
| 11:01 | 12:03 | 55:02 | 13:12        | 03:01 | 0.02 | <b>572</b>  |
| 11:01 | 12:03 | 55:02 | 15:01        | 06:01 | 0.01 | <b>1036</b> |
| 11:01 | 12:03 | 55:02 | 16:02        | 05:02 | 0.01 | <b>1036</b> |
| 11:01 | 14:02 | 18:02 | 12:02        | 03:01 | 0.01 | <b>1036</b> |
| 11:01 | 14:02 | 27:24 | 04:05        | 04:01 | 0.01 | <b>1036</b> |
| 11:01 | 14:02 | 40:01 | 04:05        | 04:01 | 0.01 | <b>1036</b> |
| 11:01 | 14:02 | 40:01 | 15:01        | 06:02 | 0.01 | <b>1036</b> |
| 11:01 | 14:02 | 40:02 | 04:04        | 03:02 | 0.01 | <b>1036</b> |
| 11:01 | 14:02 | 46:01 | 08:03        | 06:01 | 0.01 | <b>1036</b> |
| 11:01 | 14:02 | 51:01 | 04:01        | 03:02 | 0.01 | <b>1036</b> |

|       |           |       |                      |       |      |      |
|-------|-----------|-------|----------------------|-------|------|------|
| 11:01 | 14:02     | 51:01 | 04:03                | 03:02 | 0.06 | 218  |
| 11:01 | 14:02     | 51:01 | 04:05                | 04:01 | 0.05 | 286  |
| 11:01 | 14:02     | 51:01 | 04:06                | 03:02 | 0.03 | 409  |
| 11:01 | 14:02     | 51:01 | 07:01                | 03:03 | 0.01 | 1036 |
| 11:01 | 14:02     | 51:01 | 08:02                | 04:02 | 0.02 | 572  |
| 11:01 | 14:02     | 51:01 | 08:03                | 06:01 | 0.03 | 409  |
| 11:01 | 14:02     | 51:01 | 09:01                | 03:03 | 0.39 | 19   |
| 11:01 | 14:02     | 51:01 | 09:01                | 05:03 | 0.01 | 1036 |
| 11:01 | 14:02     | 51:01 | 10:01                | 05:01 | 0.01 | 1036 |
| 11:01 | 14:02     | 51:01 | 11:01                | 03:01 | 0.02 | 572  |
| 11:01 | 14:02     | 51:01 | 11:01                | 03:03 | 0.01 | 1036 |
| 11:01 | 14:02     | 51:01 | 11:01                | 03:13 | 0.05 | 286  |
| 11:01 | 14:02     | 51:01 | 12:02                | 03:01 | 0.05 | 286  |
| 11:01 | 14:02     | 51:01 | 12:02                | 05:02 | 0.01 | 1036 |
| 11:01 | 14:02     | 51:01 | 13:02                | 06:04 | 0.01 | 1036 |
| 11:01 | 14:02     | 51:01 | 14:03                | 03:01 | 0.01 | 1036 |
| 11:01 | 14:02     | 51:01 | 14:04                | 05:03 | 0.01 | 1036 |
| 11:01 | 14:02     | 51:01 | 14:04                | 06:01 | 0.01 | 1036 |
| 11:01 | 14:02     | 51:01 | 14:05                | 05:03 | 0.02 | 572  |
| 11:01 | 14:02     | 51:01 | 14:54                | 05:02 | 0.03 | 409  |
| 11:01 | 14:02     | 51:01 | 15:01                | 06:02 | 0.12 | 97   |
| 11:01 | 14:02     | 51:01 | 16:02                | 05:02 | 0.03 | 409  |
| 11:01 | 14:02     | 51:01 | 12:01(2)<br>12:10(1) | 03:01 | 0.03 | 409  |
| 11:01 | 14:02     | 51:02 | 12:02                | 05:02 | 0.05 | 286  |
| 11:01 | 14:03     | 44:03 | 04:05                | 03:02 | 0.01 | 1036 |
| 11:01 | 14:03     | 44:03 | 13:02                | 06:04 | 0.06 | 218  |
| 11:01 | 14:03     | 46:01 | 13:02                | 06:04 | 0.01 | 1036 |
| 11:01 | 15:02     | 18:01 | 15:02                | 05:01 | 0.01 | 1036 |
| 11:01 | 15:02     | 27:07 | 07:01                | 02:02 | 0.01 | 1036 |
| 11:01 | 15:02     | 40:01 | 04:05                | 04:01 | 0.01 | 1036 |
| 11:01 | 15:02     | 40:01 | 08:03                | 06:01 | 0.02 | 572  |
| 11:01 | 15:02     | 40:01 | 11:01                | 03:01 | 0.01 | 1036 |
| 11:01 | 15:02     | 40:01 | 15:01                | 06:01 | 0.01 | 1036 |
| 11:01 | 15:02     | 40:01 | 15:01                | 06:02 | 0.05 | 286  |
| 11:01 | 15:02     | 40:02 | 08:03                | 06:01 | 0.01 | 1036 |
| 11:01 | 15:02     | 40:02 | 11:129               | 03:01 | 0.01 | 1036 |
| 11:01 | 15:02     | 40:06 | 09:01                | 03:03 | 0.01 | 1036 |
| 11:01 | 15:02     | 40:55 | 11:01                | 03:01 | 0.01 | 1036 |
| 11:01 | 15:02     | 48:01 | 15:01                | 06:01 | 0.01 | 1036 |
| 11:01 | 15:02     | 51:01 | 07:01                | 03:03 | 0.01 | 1036 |
| 11:01 | 15:02     | 51:01 | 09:01                | 03:03 | 0.02 | 572  |
| 11:01 | 15:02     | 51:01 | 11:01                | 03:13 | 0.01 | 1036 |
| 11:01 | 15:02     | 51:01 | 12:01                | 03:01 | 0.02 | 572  |
| 11:01 | 15:02     | 51:01 | 15:01                | 06:02 | 0.01 | 1036 |
| 11:01 | 15:02     | 51:02 | 04:03                | 03:02 | 0.01 | 1036 |
| 11:01 | 15:02     | 51:02 | 04:05                | 04:01 | 0.02 | 572  |
| 11:01 | 15:02     | 51:02 | 08:02                | 04:02 | 0.02 | 572  |
| 11:01 | 15:02     | 51:02 | 09:01                | 03:03 | 0.02 | 572  |
| 11:01 | 15:02     | 51:02 | 11:01                | 03:01 | 0.02 | 572  |
| 11:01 | 15:02     | 51:02 | 12:01                | 03:01 | 0.01 | 1036 |
| 11:01 | 15:02     | 51:02 | 16:02                | 05:02 | 0.01 | 1036 |
| 11:01 | 15:02     | 55:02 | 11:01                | 03:01 | 0.01 | 1036 |
| 11:01 | 15:02     | 55:02 | 12:02                | 03:01 | 0.02 | 572  |
| 11:01 | 15:02     | 57:01 | 15:02                | 06:01 | 0.01 | 1036 |
| 11:01 | 15:05     | 07:05 | 01:01                | 05:01 | 0.01 | 1036 |
| 11:01 | 15:11     | 27:05 | 03:01                | 02:01 | 0.02 | 572  |
| 11:01 | 15:11     | 27:05 | 15:01                | 03:01 | 0.01 | 1036 |
| 11:01 | 04:01:01G | 15:27 | 04:05                | 04:01 | 0.01 | 1036 |
| 11:01 | 04:01:01G | 15:27 | 07:01                | 02:02 | 0.01 | 1036 |
| 11:01 | 04:01:01G | 15:27 | 13:02                | 06:09 | 0.01 | 1036 |
| 11:01 | 04:01:01G | 40:01 | 09:01                | 03:03 | 0.02 | 572  |
| 11:01 | 04:01:01G | 48:01 | 04:06                | 03:02 | 0.01 | 1036 |

|       |                          |       |       |       |      |             |
|-------|--------------------------|-------|-------|-------|------|-------------|
| 11:01 | 04:01:01G(1)<br>04:01(1) | 35:01 | 09:01 | 03:03 | 0.02 | <b>572</b>  |
| 11:01 | 04:01:01G(1)<br>04:01(1) | 35:05 | 15:02 | 05:01 | 0.02 | <b>572</b>  |
| 11:01 | 07:01:01G                | 49:01 | 13:02 | 06:04 | 0.01 | <b>1036</b> |
| 11:01 | 08:01(1)<br>08:22(1)     | 40:01 | 11:01 | 03:01 | 0.02 | <b>572</b>  |
| 11:01 | 08:01(1)<br>08:22(1)     | 48:01 | 14:54 | 05:02 | 0.02 | <b>572</b>  |
| 11:01 | 08:01:01G                | 15:02 | 13:02 | 06:09 | 0.02 | <b>572</b>  |
| 11:01 | 08:01:01G                | 15:02 | 14:54 | 05:03 | 0.01 | <b>1036</b> |
| 11:01 | 08:01:01G                | 15:18 | 08:03 | 06:01 | 0.01 | <b>1036</b> |
| 11:01 | 08:01:01G                | 27:04 | 09:01 | 03:03 | 0.01 | <b>1036</b> |
| 11:01 | 08:01:01G(1)<br>08:01(1) | 15:01 | 15:01 | 06:02 | 0.02 | <b>572</b>  |
| 11:01 | 08:01:01G(1)<br>08:01(1) | 15:02 | 15:02 | 05:01 | 0.02 | <b>572</b>  |
| 11:01 | 08:01:01G(1)<br>08:01(1) | 15:18 | 04:05 | 04:01 | 0.02 | <b>572</b>  |
| 11:01 | 08:01:01G(1)<br>08:01(1) | 15:18 | 11:01 | 03:01 | 0.02 | <b>572</b>  |
| 11:02 | 01:02                    | 15:01 | 09:01 | 03:03 | 0.01 | <b>1036</b> |
| 11:02 | 01:02                    | 46:01 | 04:07 | 03:02 | 0.01 | <b>1036</b> |
| 11:02 | 01:02                    | 46:01 | 09:01 | 03:03 | 0.07 | <b>177</b>  |
| 11:02 | 01:02                    | 46:01 | 12:02 | 03:01 | 0.01 | <b>1036</b> |
| 11:02 | 01:02                    | 46:01 | 15:01 | 06:01 | 0.02 | <b>572</b>  |
| 11:02 | 01:02                    | 46:01 | 15:01 | 06:02 | 0.01 | <b>1036</b> |
| 11:02 | 01:02                    | 54:01 | 04:05 | 04:01 | 0.02 | <b>572</b>  |
| 11:02 | 01:02                    | 54:01 | 08:03 | 06:01 | 0.01 | <b>1036</b> |
| 11:02 | 01:02                    | 54:01 | 09:01 | 03:03 | 0.02 | <b>572</b>  |
| 11:02 | 01:02                    | 54:01 | 14:05 | 05:03 | 0.02 | <b>572</b>  |
| 11:02 | 01:02                    | 55:02 | 09:01 | 03:03 | 0.01 | <b>1036</b> |
| 11:02 | 01:02                    | 55:02 | 12:01 | 06:01 | 0.02 | <b>572</b>  |
| 11:02 | 01:02                    | 56:01 | 13:12 | 03:01 | 0.01 | <b>1036</b> |
| 11:02 | 02:02                    | 27:05 | 12:01 | 03:01 | 0.01 | <b>1036</b> |
| 11:02 | 03:02                    | 58:01 | 03:01 | 02:01 | 0.02 | <b>572</b>  |
| 11:02 | 03:02                    | 58:01 | 07:01 | 02:02 | 0.01 | <b>1036</b> |
| 11:02 | 03:03                    | 15:01 | 11:01 | 03:01 | 0.02 | <b>572</b>  |
| 11:02 | 03:03                    | 15:01 | 15:01 | 06:02 | 0.01 | <b>1036</b> |
| 11:02 | 03:03                    | 15:07 | 04:03 | 03:02 | 0.01 | <b>1036</b> |
| 11:02 | 03:03                    | 15:11 | 08:03 | 06:01 | 0.01 | <b>1036</b> |
| 11:02 | 03:03                    | 15:11 | 14:05 | 05:03 | 0.01 | <b>1036</b> |
| 11:02 | 03:03                    | 35:01 | 04:06 | 03:02 | 0.01 | <b>1036</b> |
| 11:02 | 03:03                    | 35:01 | 11:01 | 03:01 | 0.01 | <b>1036</b> |
| 11:02 | 03:03                    | 35:01 | 14:54 | 05:02 | 0.01 | <b>1036</b> |
| 11:02 | 03:03                    | 35:01 | 15:01 | 06:02 | 0.01 | <b>1036</b> |
| 11:02 | 03:03                    | 48:01 | 09:01 | 03:03 | 0.01 | <b>1036</b> |
| 11:02 | 03:03                    | 55:02 | 09:01 | 03:03 | 0.02 | <b>572</b>  |
| 11:02 | 03:04                    | 13:01 | 09:01 | 03:03 | 0.01 | <b>1036</b> |
| 11:02 | 03:04                    | 13:01 | 15:01 | 06:01 | 0.01 | <b>1036</b> |
| 11:02 | 03:04                    | 40:01 | 04:05 | 04:02 | 0.01 | <b>1036</b> |
| 11:02 | 03:04                    | 40:01 | 09:01 | 03:02 | 0.01 | <b>1036</b> |
| 11:02 | 03:04                    | 40:01 | 09:01 | 03:03 | 0.02 | <b>572</b>  |
| 11:02 | 03:04                    | 40:01 | 12:10 | 03:01 | 0.01 | <b>1036</b> |
| 11:02 | 03:04                    | 40:01 | 14:54 | 05:02 | 0.01 | <b>1036</b> |
| 11:02 | 03:04                    | 40:01 | 15:01 | 05:02 | 0.01 | <b>1036</b> |
| 11:02 | 03:04                    | 40:01 | 16:02 | 05:02 | 0.02 | <b>572</b>  |
| 11:02 | 03:04                    | 40:02 | 15:01 | 05:03 | 0.01 | <b>1036</b> |
| 11:02 | 04:01                    | 15:01 | 04:06 | 03:02 | 0.05 | <b>286</b>  |
| 11:02 | 04:01                    | 15:01 | 07:01 | 02:02 | 0.01 | <b>1036</b> |
| 11:02 | 04:01                    | 15:01 | 09:01 | 03:34 | 0.01 | <b>1036</b> |
| 11:02 | 04:01                    | 15:27 | 03:01 | 02:01 | 0.01 | <b>1036</b> |
| 11:02 | 04:01                    | 15:27 | 04:06 | 03:02 | 0.07 | <b>177</b>  |
| 11:02 | 04:01                    | 15:27 | 09:01 | 03:03 | 0.05 | <b>286</b>  |

|       |           |        |           |       |      |      |
|-------|-----------|--------|-----------|-------|------|------|
| 11:02 | 04:01     | 15:109 | 04:06     | 03:02 | 0.01 | 1036 |
| 11:02 | 04:01     | 55:02  | 12:01:01G | 03:01 | 0.01 | 1036 |
| 11:02 | 04:03     | 15:12  | 15:02     | 05:02 | 0.01 | 1036 |
| 11:02 | 04:03     | 15:25  | 12:02     | 03:01 | 0.02 | 572  |
| 11:02 | 06:02     | 13:02  | 07:01     | 02:02 | 0.02 | 572  |
| 11:02 | 07:02     | 15:01  | 12:02     | 03:01 | 0.01 | 1036 |
| 11:02 | 07:02     | 15:01  | 15:01     | 06:02 | 0.01 | 1036 |
| 11:02 | 07:02     | 27:06  | 12:02     | 03:01 | 0.01 | 1036 |
| 11:02 | 07:02     | 38:02  | 07:01     | 03:03 | 0.01 | 1036 |
| 11:02 | 07:02     | 38:02  | 16:02     | 05:02 | 0.01 | 1036 |
| 11:02 | 07:02     | 39:01  | 08:03     | 06:01 | 0.05 | 286  |
| 11:02 | 07:02     | 39:01  | 09:01     | 03:03 | 0.02 | 572  |
| 11:02 | 07:02     | 40:01  | 04:05     | 03:02 | 0.01 | 1036 |
| 11:02 | 07:02     | 40:01  | 04:05     | 04:01 | 0.01 | 1036 |
| 11:02 | 07:02     | 40:01  | 08:03     | 06:01 | 0.01 | 1036 |
| 11:02 | 07:02     | 40:01  | 09:01     | 03:03 | 0.03 | 409  |
| 11:02 | 07:02     | 40:01  | 14:05     | 05:03 | 0.01 | 1036 |
| 11:02 | 07:02     | 40:01  | 14:54     | 05:02 | 0.01 | 1036 |
| 11:02 | 07:02     | 40:01  | 15:01     | 05:02 | 0.01 | 1036 |
| 11:02 | 07:02     | 40:01  | 15:01     | 06:01 | 0.01 | 1036 |
| 11:02 | 07:02     | 40:01  | 16:02     | 05:02 | 0.01 | 1036 |
| 11:02 | 07:02     | 40:01  | 12:01:01G | 03:01 | 0.02 | 572  |
| 11:02 | 08:01     | 15:01  | 15:01     | 06:02 | 0.01 | 1036 |
| 11:02 | 08:01     | 15:02  | 04:03     | 03:02 | 0.01 | 1036 |
| 11:02 | 08:01     | 15:02  | 09:01     | 03:03 | 0.01 | 1036 |
| 11:02 | 08:01     | 15:02  | 12:01     | 03:01 | 0.01 | 1036 |
| 11:02 | 08:01     | 27:04  | 09:01     | 03:03 | 0.01 | 1036 |
| 11:02 | 08:01     | 48:01  | 04:05     | 04:01 | 0.01 | 1036 |
| 11:02 | 08:03     | 48:01  | 09:01     | 03:01 | 0.01 | 1036 |
| 11:02 | 07:66     | 40:01  | 09:01     | 03:03 | 0.01 | 1036 |
| 11:02 | 08:22     | 48:01  | 14:54     | 05:03 | 0.01 | 1036 |
| 11:02 | 12:02     | 15:01  | 08:03     | 06:01 | 0.01 | 1036 |
| 11:02 | 12:02     | 27:04  | 04:04     | 03:02 | 0.03 | 409  |
| 11:02 | 12:02     | 27:04  | 04:05     | 04:01 | 0.03 | 409  |
| 11:02 | 12:02     | 27:04  | 04:06     | 03:02 | 0.01 | 1036 |
| 11:02 | 12:02     | 27:04  | 08:02     | 04:02 | 0.01 | 1036 |
| 11:02 | 12:02     | 27:04  | 08:03     | 06:01 | 0.05 | 286  |
| 11:02 | 12:02     | 27:04  | 09:01     | 03:03 | 0.05 | 286  |
| 11:02 | 12:02     | 27:04  | 11:01     | 03:01 | 0.05 | 286  |
| 11:02 | 12:02     | 27:04  | 12:02     | 03:01 | 0.36 | 22   |
| 11:02 | 12:02     | 27:04  | 13:02     | 06:09 | 0.01 | 1036 |
| 11:02 | 12:02     | 27:04  | 14:54     | 05:02 | 0.01 | 1036 |
| 11:02 | 12:02     | 27:04  | 14:54     | 05:03 | 0.01 | 1036 |
| 11:02 | 12:02     | 27:04  | 15:01     | 06:01 | 0.01 | 1036 |
| 11:02 | 12:02     | 27:04  | 15:01     | 06:02 | 0.01 | 1036 |
| 11:02 | 12:02     | 40:01  | 08:03     | 06:01 | 0.01 | 1036 |
| 11:02 | 12:02     | 40:02  | 03:01     | 02:01 | 0.01 | 1036 |
| 11:02 | 12:02     | 48:01  | 14:05     | 05:03 | 0.01 | 1036 |
| 11:02 | 12:02     | 52:01  | 10:01     | 05:01 | 0.01 | 1036 |
| 11:02 | 12:02     | 54:01  | 04:05     | 04:01 | 0.01 | 1036 |
| 11:02 | 12:02     | 55:02  | 11:01     | 03:01 | 0.01 | 1036 |
| 11:02 | 12:03     | 55:02  | 12:02     | 05:02 | 0.01 | 1036 |
| 11:02 | 12:03     | 55:02  | 15:01     | 06:01 | 0.01 | 1036 |
| 11:02 | 12:03     | 55:02  | 15:01     | 06:02 | 0.01 | 1036 |
| 11:02 | 14:02     | 51:01  | 04:05     | 04:01 | 0.01 | 1036 |
| 11:02 | 14:02     | 51:01  | 09:01     | 03:03 | 0.01 | 1036 |
| 11:02 | 14:02     | 51:02  | 12:02     | 05:02 | 0.01 | 1036 |
| 11:02 | 14:02     | 51:06  | 15:01     | 06:01 | 0.01 | 1036 |
| 11:02 | 15:02     | 40:01  | 12:01     | 03:01 | 0.01 | 1036 |
| 11:02 | 15:02     | 51:02  | 09:01     | 03:03 | 0.01 | 1036 |
| 11:02 | 04:01:01G | 15:27  | 12:02     | 03:01 | 0.01 | 1036 |
| 11:02 | 04:01:01G | 35:01  | 14:05     | 05:03 | 0.01 | 1036 |
| 11:02 | 08:01:01G | 40:06  | 04:03     | 03:02 | 0.01 | 1036 |

|        |       |       |           |       |      |      |
|--------|-------|-------|-----------|-------|------|------|
| 11:03  | 07:02 | 52:01 | 12:02     | 03:01 | 0.01 | 1036 |
| 11:03  | 07:02 | 52:01 | 12:02     | 05:02 | 0.01 | 1036 |
| 11:04  | 07:02 | 40:01 | 15:01     | 06:02 | 0.01 | 1036 |
| 11:27  | 03:03 | 40:02 | 15:01     | 06:02 | 0.01 | 1036 |
| 11:162 | 03:04 | 13:01 | 15:01     | 06:01 | 0.01 | 1036 |
| 23:01  | 04:01 | 44:03 | 03:01     | 02:01 | 0.05 | 286  |
| 23:01  | 04:01 | 44:03 | 07:01     | 02:02 | 0.02 | 572  |
| 23:01  | 06:02 | 45:01 | 07:01     | 02:02 | 0.03 | 409  |
| 23:01  | 06:02 | 50:01 | 03:01     | 02:01 | 0.01 | 1036 |
| 23:01  | 07:01 | 49:01 | 01:01     | 05:04 | 0.01 | 1036 |
| 23:01  | 07:02 | 38:02 | 12:02     | 03:01 | 0.01 | 1036 |
| 23:01  | 08:01 | 15:02 | 12:02     | 03:01 | 0.01 | 1036 |
| 23:01  | 17:01 | 41:01 | 07:01     | 02:02 | 0.01 | 1036 |
| 24:02  | 01:02 | 13:01 | 15:01     | 06:02 | 0.01 | 1036 |
| 24:02  | 01:02 | 13:01 | 16:02     | 05:02 | 0.01 | 1036 |
| 24:02  | 01:02 | 15:01 | 04:04     | 03:02 | 0.01 | 1036 |
| 24:02  | 01:02 | 15:01 | 04:06     | 03:02 | 0.01 | 1036 |
| 24:02  | 01:02 | 15:01 | 07:01     | 02:02 | 0.01 | 1036 |
| 24:02  | 01:02 | 15:01 | 08:03     | 06:01 | 0.02 | 572  |
| 24:02  | 01:02 | 15:01 | 09:01     | 03:02 | 0.01 | 1036 |
| 24:02  | 01:02 | 15:01 | 09:01     | 03:03 | 0.07 | 177  |
| 24:02  | 01:02 | 15:01 | 11:01     | 03:01 | 0.01 | 1036 |
| 24:02  | 01:02 | 15:01 | 12:01     | 03:01 | 0.01 | 1036 |
| 24:02  | 01:02 | 15:01 | 12:02     | 03:01 | 0.01 | 1036 |
| 24:02  | 01:02 | 15:01 | 14:54     | 05:02 | 0.02 | 572  |
| 24:02  | 01:02 | 15:01 | 15:01     | 06:02 | 0.07 | 177  |
| 24:02  | 01:02 | 15:58 | 11:01     | 03:01 | 0.01 | 1036 |
| 24:02  | 01:02 | 15:58 | 14:54     | 05:02 | 0.02 | 572  |
| 24:02  | 01:02 | 27:05 | 01:01     | 05:01 | 0.01 | 1036 |
| 24:02  | 01:02 | 27:05 | 04:07     | 03:01 | 0.01 | 1036 |
| 24:02  | 01:02 | 40:01 | 11:01     | 03:01 | 0.01 | 1036 |
| 24:02  | 01:02 | 40:02 | 04:01     | 03:01 | 0.01 | 1036 |
| 24:02  | 01:02 | 40:03 | 15:01     | 06:02 | 0.01 | 1036 |
| 24:02  | 01:02 | 40:06 | 14:54     | 05:02 | 0.01 | 1036 |
| 24:02  | 01:02 | 46:01 | 04:03     | 03:02 | 0.01 | 1036 |
| 24:02  | 01:02 | 46:01 | 04:05     | 04:01 | 0.02 | 572  |
| 24:02  | 01:02 | 46:01 | 04:06     | 03:02 | 0.01 | 1036 |
| 24:02  | 01:02 | 46:01 | 08:03     | 06:01 | 0.13 | 85   |
| 24:02  | 01:02 | 46:01 | 09:01     | 03:02 | 0.01 | 1036 |
| 24:02  | 01:02 | 46:01 | 09:01     | 03:03 | 0.33 | 24   |
| 24:02  | 01:02 | 46:01 | 12:02     | 03:01 | 0.02 | 572  |
| 24:02  | 01:02 | 46:01 | 14:03     | 03:01 | 0.01 | 1036 |
| 24:02  | 01:02 | 46:01 | 14:05     | 03:03 | 0.01 | 1036 |
| 24:02  | 01:02 | 46:01 | 14:54     | 05:02 | 0.01 | 1036 |
| 24:02  | 01:02 | 46:01 | 14:54     | 05:03 | 0.01 | 1036 |
| 24:02  | 01:02 | 46:01 | 15:02     | 06:01 | 0.02 | 572  |
| 24:02  | 01:02 | 46:01 | 16:02     | 05:02 | 0.01 | 1036 |
| 24:02  | 01:02 | 46:01 | 12:01:01G | 03:01 | 0.01 | 1036 |
| 24:02  | 01:02 | 48:01 | 12:01     | 03:01 | 0.01 | 1036 |
| 24:02  | 01:02 | 48:01 | 15:01     | 06:02 | 0.01 | 1036 |
| 24:02  | 01:02 | 51:01 | 04:02     | 03:02 | 0.01 | 1036 |
| 24:02  | 01:02 | 51:01 | 04:03     | 03:02 | 0.01 | 1036 |
| 24:02  | 01:02 | 51:01 | 12:02     | 03:01 | 0.01 | 1036 |
| 24:02  | 01:02 | 54:01 | 03:01     | 02:01 | 0.02 | 572  |
| 24:02  | 01:02 | 54:01 | 04:03     | 03:02 | 0.01 | 1036 |
| 24:02  | 01:02 | 54:01 | 04:04     | 03:02 | 0.01 | 1036 |
| 24:02  | 01:02 | 54:01 | 04:05     | 03:03 | 0.01 | 1036 |
| 24:02  | 01:02 | 54:01 | 04:05     | 04:01 | 0.51 | 13   |
| 24:02  | 01:02 | 54:01 | 04:07     | 03:02 | 0.01 | 1036 |
| 24:02  | 01:02 | 54:01 | 04:10     | 04:02 | 0.01 | 1036 |
| 24:02  | 01:02 | 54:01 | 07:01     | 02:02 | 0.01 | 1036 |
| 24:02  | 01:02 | 54:01 | 08:03     | 06:01 | 0.14 | 76   |
| 24:02  | 01:02 | 54:01 | 09:01     | 03:01 | 0.01 | 1036 |



|       |       |       |                          |       |      |             |
|-------|-------|-------|--------------------------|-------|------|-------------|
| 24:02 | 01:02 | 54:01 | 09:01                    | 03:03 | 0.16 | <b>59</b>   |
| 24:02 | 01:02 | 54:01 | 09:01                    | 04:01 | 0.01 | <b>1036</b> |
| 24:02 | 01:02 | 54:01 | 11:01                    | 03:01 | 0.15 | <b>64</b>   |
| 24:02 | 01:02 | 54:01 | 12:02                    | 03:01 | 0.05 | <b>286</b>  |
| 24:02 | 01:02 | 54:01 | 13:02                    | 06:04 | 0.01 | <b>1036</b> |
| 24:02 | 01:02 | 54:01 | 14:05                    | 05:03 | 0.15 | <b>64</b>   |
| 24:02 | 01:02 | 54:01 | 14:18                    | 05:03 | 0.01 | <b>1036</b> |
| 24:02 | 01:02 | 54:01 | 14:54                    | 05:03 | 0.01 | <b>1036</b> |
| 24:02 | 01:02 | 54:01 | 15:01                    | 05:02 | 0.01 | <b>1036</b> |
| 24:02 | 01:02 | 54:01 | 15:01                    | 06:02 | 0.08 | <b>151</b>  |
| 24:02 | 01:02 | 54:01 | 15:02                    | 06:01 | 0.02 | <b>572</b>  |
| 24:02 | 01:02 | 54:01 | 12:01:01G                | 03:01 | 0.01 | <b>1036</b> |
| 24:02 | 01:02 | 55:01 | 07:01                    | 03:03 | 0.01 | <b>1036</b> |
| 24:02 | 01:02 | 55:02 | 04:03                    | 03:02 | 0.01 | <b>1036</b> |
| 24:02 | 01:02 | 55:02 | 04:05                    | 04:01 | 0.01 | <b>1036</b> |
| 24:02 | 01:02 | 55:02 | 04:06                    | 03:02 | 0.01 | <b>1036</b> |
| 24:02 | 01:02 | 55:02 | 08:03                    | 06:01 | 0.01 | <b>1036</b> |
| 24:02 | 01:02 | 55:02 | 09:01                    | 03:03 | 0.05 | <b>286</b>  |
| 24:02 | 01:02 | 55:02 | 11:01                    | 03:01 | 0.01 | <b>1036</b> |
| 24:02 | 01:02 | 55:02 | 11:01                    | 03:13 | 0.01 | <b>1036</b> |
| 24:02 | 01:02 | 55:02 | 12:01                    | 03:01 | 0.05 | <b>286</b>  |
| 24:02 | 01:02 | 55:02 | 14:05                    | 05:03 | 0.01 | <b>1036</b> |
| 24:02 | 01:02 | 55:02 | 14:07                    | 05:02 | 0.01 | <b>1036</b> |
| 24:02 | 01:02 | 55:02 | 14:54                    | 05:02 | 0.01 | <b>1036</b> |
| 24:02 | 01:02 | 55:02 | 15:01                    | 05:02 | 0.01 | <b>1036</b> |
| 24:02 | 01:02 | 55:02 | 15:01                    | 06:02 | 0.02 | <b>572</b>  |
| 24:02 | 01:02 | 56:04 | 14:04                    | 05:03 | 0.01 | <b>1036</b> |
| 24:02 | 01:02 | 57:01 | 13:02                    | 06:09 | 0.01 | <b>1036</b> |
| 24:02 | 01:02 | 59:01 | 04:03                    | 03:02 | 0.01 | <b>1036</b> |
| 24:02 | 01:02 | 59:01 | 04:05                    | 04:01 | 0.03 | <b>409</b>  |
| 24:02 | 01:03 | 46:01 | 09:01                    | 03:03 | 0.09 | <b>130</b>  |
| 24:02 | 01:03 | 46:01 | 12:02                    | 03:01 | 0.01 | <b>1036</b> |
| 24:02 | 01:03 | 46:01 | 14:05                    | 05:03 | 0.01 | <b>1036</b> |
| 24:02 | 01:03 | 46:01 | 15:01                    | 05:02 | 0.01 | <b>1036</b> |
| 24:02 | 01:06 | 55:02 | 15:01                    | 06:02 | 0.01 | <b>1036</b> |
| 24:02 | 02:02 | 27:05 | 04:01                    | 03:01 | 0.01 | <b>1036</b> |
| 24:02 | 02:02 | 27:05 | 04:04                    | 03:02 | 0.01 | <b>1036</b> |
| 24:02 | 02:02 | 27:05 | 10:01                    | 05:01 | 0.02 | <b>572</b>  |
| 24:02 | 02:02 | 27:05 | 15:01                    | 06:02 | 0.01 | <b>1036</b> |
| 24:02 | 02:02 | 27:05 | 12:01:01G                | 03:01 | 0.01 | <b>1036</b> |
| 24:02 | 03:02 | 51:01 | 13:01                    | 06:03 | 0.01 | <b>1036</b> |
| 24:02 | 03:02 | 58:01 | 03:01                    | 02:01 | 0.17 | <b>54</b>   |
| 24:02 | 03:02 | 58:01 | 07:01                    | 02:02 | 0.02 | <b>572</b>  |
| 24:02 | 03:02 | 58:01 | 09:01                    | 03:03 | 0.02 | <b>572</b>  |
| 24:02 | 03:02 | 58:01 | 13:02                    | 06:09 | 0.07 | <b>177</b>  |
| 24:02 | 03:02 | 58:01 | 15:01                    | 06:01 | 0.01 | <b>1036</b> |
| 24:02 | 03:03 | 13:02 | 07:01                    | 02:02 | 0.01 | <b>1036</b> |
| 24:02 | 03:03 | 15:01 | 04:01                    | 03:01 | 0.01 | <b>1036</b> |
| 24:02 | 03:03 | 15:01 | 04:05                    | 04:01 | 0.02 | <b>572</b>  |
| 24:02 | 03:03 | 15:01 | 04:06                    | 03:02 | 0.01 | <b>1036</b> |
| 24:02 | 03:03 | 15:01 | 08:03                    | 06:01 | 0.01 | <b>1036</b> |
| 24:02 | 03:03 | 15:01 | 09:01                    | 03:02 | 0.01 | <b>1036</b> |
| 24:02 | 03:03 | 15:01 | 09:01                    | 03:03 | 0.02 | <b>572</b>  |
| 24:02 | 03:03 | 15:01 | 14:05                    | 05:03 | 0.03 | <b>409</b>  |
| 24:02 | 03:03 | 15:01 | 15:01                    | 05:02 | 0.02 | <b>572</b>  |
| 24:02 | 03:03 | 15:01 | 15:01                    | 06:02 | 0.08 | <b>151</b>  |
| 24:02 | 03:03 | 15:01 | 12:01:01G(3)<br>12:01(1) | 03:01 | 0.05 | <b>286</b>  |
| 24:02 | 03:03 | 15:07 | 03:01                    | 02:01 | 0.01 | <b>1036</b> |
| 24:02 | 03:03 | 15:07 | 04:01                    | 03:01 | 0.01 | <b>1036</b> |
| 24:02 | 03:03 | 15:07 | 04:03                    | 03:02 | 0.07 | <b>177</b>  |
| 24:02 | 03:03 | 15:07 | 04:05                    | 04:01 | 0.01 | <b>1036</b> |
| 24:02 | 03:03 | 15:07 | 11:01                    | 03:01 | 0.01 | <b>1036</b> |

|       |       |       |              |       |      |      |
|-------|-------|-------|--------------|-------|------|------|
| 24:02 | 03:03 | 15:07 | 11:01        | 04:02 | 0.01 | 1036 |
| 24:02 | 03:03 | 15:07 | 12:01        | 03:01 | 0.01 | 1036 |
| 24:02 | 03:03 | 15:07 | 14:05        | 05:03 | 0.02 | 572  |
| 24:02 | 03:03 | 15:07 | 14:54        | 05:02 | 0.01 | 1036 |
| 24:02 | 03:03 | 15:07 | 15:01        | 06:02 | 0.01 | 1036 |
| 24:02 | 03:03 | 15:11 | 07:01        | 02:02 | 0.01 | 1036 |
| 24:02 | 03:03 | 15:11 | 07:01        | 03:03 | 0.01 | 1036 |
| 24:02 | 03:03 | 15:11 | 08:03        | 06:01 | 0.01 | 1036 |
| 24:02 | 03:03 | 15:11 | 09:01        | 03:03 | 0.09 | 130  |
| 24:02 | 03:03 | 15:11 | 12:02        | 03:01 | 0.01 | 1036 |
| 24:02 | 03:03 | 15:11 | 14:05        | 03:03 | 0.02 | 572  |
| 24:02 | 03:03 | 15:11 | 15:01        | 06:02 | 0.01 | 1036 |
| 24:02 | 03:03 | 15:12 | 12:02        | 03:01 | 0.01 | 1036 |
| 24:02 | 03:03 | 27:04 | 04:06        | 03:02 | 0.01 | 1036 |
| 24:02 | 03:03 | 27:04 | 08:03        | 06:01 | 0.01 | 1036 |
| 24:02 | 03:03 | 35:01 | 04:05        | 04:01 | 0.02 | 572  |
| 24:02 | 03:03 | 35:01 | 04:10        | 04:02 | 0.01 | 1036 |
| 24:02 | 03:03 | 35:01 | 08:03        | 06:01 | 0.03 | 409  |
| 24:02 | 03:03 | 35:01 | 09:01        | 03:03 | 0.06 | 218  |
| 24:02 | 03:03 | 35:01 | 11:01        | 03:01 | 0.12 | 97   |
| 24:02 | 03:03 | 35:01 | 11:01        | 04:02 | 0.01 | 1036 |
| 24:02 | 03:03 | 35:01 | 12:02        | 03:01 | 0.03 | 409  |
| 24:02 | 03:03 | 35:01 | 14:54        | 05:02 | 0.01 | 1036 |
| 24:02 | 03:03 | 35:01 | 15:01        | 06:02 | 0.12 | 97   |
| 24:02 | 03:03 | 35:01 | 16:02        | 05:02 | 0.01 | 1036 |
| 24:02 | 03:03 | 35:01 | 12:01:01G(1) | 03:01 | 0.02 | 572  |
| 24:02 | 03:03 | 35:03 | 12:01(1)     | 06:03 | 0.01 | 1036 |
| 24:02 | 03:03 | 39:01 | 03:01        | 02:01 | 0.01 | 1036 |
| 24:02 | 03:03 | 40:01 | 08:03        | 06:01 | 0.01 | 1036 |
| 24:02 | 03:03 | 40:01 | 11:01        | 03:01 | 0.02 | 572  |
| 24:02 | 03:03 | 40:02 | 04:05        | 04:01 | 0.02 | 572  |
| 24:02 | 03:03 | 40:02 | 08:03        | 06:01 | 0.01 | 1036 |
| 24:02 | 03:03 | 40:02 | 09:01        | 03:01 | 0.01 | 1036 |
| 24:02 | 03:03 | 40:02 | 09:01        | 03:03 | 0.10 | 115  |
| 24:02 | 03:03 | 40:02 | 11:01        | 03:01 | 0.06 | 218  |
| 24:02 | 03:03 | 40:02 | 12:01        | 03:01 | 0.05 | 286  |
| 24:02 | 03:03 | 40:02 | 14:54        | 05:02 | 0.01 | 1036 |
| 24:02 | 03:03 | 40:02 | 14:54        | 05:03 | 0.02 | 572  |
| 24:02 | 03:03 | 40:02 | 15:01        | 06:02 | 0.08 | 151  |
| 24:02 | 03:03 | 48:01 | 12:02        | 03:01 | 0.01 | 1036 |
| 24:02 | 03:03 | 48:01 | 14:07        | 05:02 | 0.01 | 1036 |
| 24:02 | 03:03 | 51:01 | 04:06        | 03:02 | 0.01 | 1036 |
| 24:02 | 03:03 | 51:01 | 09:01        | 03:03 | 0.01 | 1036 |
| 24:02 | 03:03 | 55:02 | 04:04        | 03:02 | 0.06 | 218  |
| 24:02 | 03:03 | 55:02 | 09:01        | 03:03 | 0.03 | 409  |
| 24:02 | 03:03 | 55:02 | 12:02        | 03:01 | 0.01 | 1036 |
| 24:02 | 03:03 | 55:02 | 15:01        | 06:02 | 0.01 | 1036 |
| 24:02 | 03:03 | 55:04 | 09:01        | 04:01 | 0.01 | 1036 |
| 24:02 | 03:03 | 55:04 | 12:01        | 03:01 | 0.01 | 1036 |
| 24:02 | 03:03 | 56:01 | 09:01        | 03:03 | 0.01 | 1036 |
| 24:02 | 03:03 | 40:78 | 12:01        | 03:01 | 0.01 | 1036 |
| 24:02 | 03:04 | 13:01 | 03:01        | 02:01 | 0.01 | 1036 |
| 24:02 | 03:04 | 13:01 | 04:05        | 03:02 | 0.02 | 572  |
| 24:02 | 03:04 | 13:01 | 04:05        | 04:01 | 0.06 | 218  |
| 24:02 | 03:04 | 13:01 | 08:03        | 06:01 | 0.03 | 409  |
| 24:02 | 03:04 | 13:01 | 09:01        | 03:03 | 0.02 | 572  |
| 24:02 | 03:04 | 13:01 | 11:01        | 03:01 | 0.02 | 572  |
| 24:02 | 03:04 | 13:01 | 11:01        | 03:02 | 0.01 | 1036 |
| 24:02 | 03:04 | 13:01 | 12:02        | 03:01 | 0.39 | 19   |
| 24:02 | 03:04 | 13:01 | 13:01        | 06:03 | 0.01 | 1036 |
| 24:02 | 03:04 | 13:01 | 14:05        | 05:03 | 0.01 | 1036 |
| 24:02 | 03:04 | 13:01 | 14:54        | 05:02 | 0.01 | 1036 |

|       |       |       |                          |       |      |             |
|-------|-------|-------|--------------------------|-------|------|-------------|
| 24:02 | 03:04 | 13:01 | 15:01                    | 05:02 | 0.01 | <b>1036</b> |
| 24:02 | 03:04 | 13:01 | 15:01                    | 06:01 | 0.13 | <b>85</b>   |
| 24:02 | 03:04 | 13:01 | 15:01                    | 06:02 | 0.01 | <b>1036</b> |
| 24:02 | 03:04 | 13:01 | 15:01                    | 06:10 | 0.02 | <b>572</b>  |
| 24:02 | 03:04 | 13:01 | 15:02                    | 05:02 | 0.01 | <b>1036</b> |
| 24:02 | 03:04 | 13:01 | 15:02                    | 05:03 | 0.01 | <b>1036</b> |
| 24:02 | 03:04 | 13:01 | 16:02                    | 05:02 | 0.07 | <b>177</b>  |
| 24:02 | 03:04 | 13:01 | 12:01:01G                | 03:01 | 0.01 | <b>1036</b> |
| 24:02 | 03:04 | 13:02 | 07:01                    | 02:02 | 0.01 | <b>1036</b> |
| 24:02 | 03:04 | 15:01 | 09:01                    | 03:03 | 0.03 | <b>409</b>  |
| 24:02 | 03:04 | 15:01 | 14:05                    | 05:03 | 0.01 | <b>1036</b> |
| 24:02 | 03:04 | 15:01 | 15:01                    | 06:02 | 0.01 | <b>1036</b> |
| 24:02 | 03:04 | 15:27 | 04:03                    | 03:02 | 0.01 | <b>1036</b> |
| 24:02 | 03:04 | 27:06 | 12:02                    | 03:01 | 0.02 | <b>572</b>  |
| 24:02 | 03:04 | 27:06 | 15:02                    | 05:01 | 0.01 | <b>1036</b> |
| 24:02 | 03:04 | 35:01 | 14:05                    | 05:03 | 0.01 | <b>1036</b> |
| 24:02 | 03:04 | 39:01 | 04:10                    | 03:03 | 0.01 | <b>1036</b> |
| 24:02 | 03:04 | 40:01 | 04:04                    | 03:02 | 0.01 | <b>1036</b> |
| 24:02 | 03:04 | 40:01 | 04:05                    | 03:01 | 0.01 | <b>1036</b> |
| 24:02 | 03:04 | 40:01 | 04:05                    | 04:01 | 0.06 | <b>218</b>  |
| 24:02 | 03:04 | 40:01 | 04:06                    | 03:02 | 0.01 | <b>1036</b> |
| 24:02 | 03:04 | 40:01 | 08:02                    | 04:02 | 0.01 | <b>1036</b> |
| 24:02 | 03:04 | 40:01 | 08:03                    | 03:03 | 0.01 | <b>1036</b> |
| 24:02 | 03:04 | 40:01 | 08:03                    | 06:01 | 0.03 | <b>409</b>  |
| 24:02 | 03:04 | 40:01 | 09:01                    | 03:02 | 0.01 | <b>1036</b> |
| 24:02 | 03:04 | 40:01 | 09:01                    | 03:03 | 0.13 | <b>85</b>   |
| 24:02 | 03:04 | 40:01 | 11:01                    | 03:01 | 0.33 | <b>24</b>   |
| 24:02 | 03:04 | 40:01 | 12:01                    | 05:03 | 0.01 | <b>1036</b> |
| 24:02 | 03:04 | 40:01 | 12:02                    | 03:01 | 0.01 | <b>1036</b> |
| 24:02 | 03:04 | 40:01 | 13:02                    | 06:09 | 0.01 | <b>1036</b> |
| 24:02 | 03:04 | 40:01 | 14:05                    | 05:03 | 0.03 | <b>409</b>  |
| 24:02 | 03:04 | 40:01 | 14:54                    | 05:02 | 0.05 | <b>286</b>  |
| 24:02 | 03:04 | 40:01 | 14:54                    | 05:03 | 0.01 | <b>1036</b> |
| 24:02 | 03:04 | 40:01 | 15:01                    | 05:02 | 0.05 | <b>286</b>  |
| 24:02 | 03:04 | 40:01 | 15:01                    | 06:02 | 0.20 | <b>48</b>   |
| 24:02 | 03:04 | 40:01 | 16:02                    | 05:02 | 0.12 | <b>97</b>   |
| 24:02 | 03:04 | 40:01 | 12:01:01G(1)<br>12:10(2) | 03:01 | 0.03 | <b>409</b>  |
| 24:02 | 03:04 | 40:02 | 04:01                    | 03:01 | 0.03 | <b>409</b>  |
| 24:02 | 03:04 | 40:02 | 04:06                    | 03:02 | 0.01 | <b>1036</b> |
| 24:02 | 03:04 | 40:02 | 08:03                    | 06:01 | 0.01 | <b>1036</b> |
| 24:02 | 03:04 | 40:02 | 09:01                    | 03:03 | 0.06 | <b>218</b>  |
| 24:02 | 03:04 | 40:02 | 09:01                    | 04:02 | 0.01 | <b>1036</b> |
| 24:02 | 03:04 | 40:02 | 11:01                    | 03:01 | 0.02 | <b>572</b>  |
| 24:02 | 03:04 | 40:02 | 12:02                    | 03:01 | 0.01 | <b>1036</b> |
| 24:02 | 03:04 | 40:02 | 14:05                    | 05:03 | 0.01 | <b>1036</b> |
| 24:02 | 03:04 | 40:02 | 14:54                    | 03:02 | 0.01 | <b>1036</b> |
| 24:02 | 03:04 | 40:02 | 14:54                    | 05:02 | 0.02 | <b>572</b>  |
| 24:02 | 03:04 | 40:02 | 14:54                    | 05:03 | 0.01 | <b>1036</b> |
| 24:02 | 03:04 | 40:02 | 15:01                    | 05:03 | 0.05 | <b>286</b>  |
| 24:02 | 03:04 | 40:02 | 15:01                    | 06:01 | 0.01 | <b>1036</b> |
| 24:02 | 03:04 | 40:02 | 15:01                    | 06:02 | 0.01 | <b>1036</b> |
| 24:02 | 03:04 | 40:02 | 16:02                    | 05:02 | 0.01 | <b>1036</b> |
| 24:02 | 03:04 | 40:03 | 09:01                    | 03:03 | 0.01 | <b>1036</b> |
| 24:02 | 03:04 | 40:03 | 15:01                    | 03:03 | 0.01 | <b>1036</b> |
| 24:02 | 03:04 | 40:06 | 09:01                    | 03:03 | 0.02 | <b>572</b>  |
| 24:02 | 03:04 | 40:06 | 11:01                    | 03:01 | 0.01 | <b>1036</b> |
| 24:02 | 03:04 | 40:06 | 12:02                    | 03:01 | 0.01 | <b>1036</b> |
| 24:02 | 03:04 | 40:06 | 14:05                    | 03:03 | 0.01 | <b>1036</b> |
| 24:02 | 03:04 | 46:01 | 03:01                    | 02:01 | 0.01 | <b>1036</b> |
| 24:02 | 03:04 | 46:01 | 09:01                    | 03:03 | 0.02 | <b>572</b>  |
| 24:02 | 03:04 | 46:01 | 15:01                    | 06:02 | 0.01 | <b>1036</b> |
| 24:02 | 03:04 | 48:01 | 08:03                    | 06:01 | 0.01 | <b>1036</b> |

|       |       |           |           |       |      |      |
|-------|-------|-----------|-----------|-------|------|------|
| 24:02 | 03:04 | 48:01     | 09:01     | 03:03 | 0.01 | 1036 |
| 24:02 | 03:04 | 48:01     | 14:02     | 03:01 | 0.01 | 1036 |
| 24:02 | 03:04 | 55:02     | 12:02     | 03:01 | 0.02 | 572  |
| 24:02 | 03:04 | 40:40:01G | 15:01     | 06:02 | 0.01 | 1036 |
| 24:02 | 03:04 | 40:76     | 11:01     | 03:01 | 0.01 | 1036 |
| 24:02 | 04:01 | 13:02     | 07:01     | 02:02 | 0.01 | 1036 |
| 24:02 | 04:01 | 15:01     | 04:06     | 03:02 | 0.20 | 48   |
| 24:02 | 04:01 | 15:01     | 09:01     | 03:03 | 0.03 | 409  |
| 24:02 | 04:01 | 15:01     | 10:01     | 05:01 | 0.01 | 1036 |
| 24:02 | 04:01 | 15:01     | 11:01     | 03:01 | 0.05 | 286  |
| 24:02 | 04:01 | 15:01     | 12:02     | 03:01 | 0.01 | 1036 |
| 24:02 | 04:01 | 15:01     | 14:05     | 03:03 | 0.01 | 1036 |
| 24:02 | 04:01 | 15:01     | 15:01     | 06:01 | 0.01 | 1036 |
| 24:02 | 04:01 | 15:01     | 15:01     | 06:02 | 0.01 | 1036 |
| 24:02 | 04:01 | 15:01     | 15:02     | 06:01 | 0.01 | 1036 |
| 24:02 | 04:01 | 15:01     | 12:01:01G | 03:01 | 0.02 | 572  |
| 24:02 | 04:01 | 15:27     | 04:01     | 03:01 | 0.01 | 1036 |
| 24:02 | 04:01 | 15:27     | 04:06     | 03:02 | 0.30 | 30   |
| 24:02 | 04:01 | 15:27     | 08:03     | 06:01 | 0.01 | 1036 |
| 24:02 | 04:01 | 15:27     | 09:01     | 03:03 | 0.02 | 572  |
| 24:02 | 04:01 | 15:27     | 11:01     | 03:01 | 0.02 | 572  |
| 24:02 | 04:01 | 15:27     | 12:01     | 03:01 | 0.01 | 1036 |
| 24:02 | 04:01 | 15:27     | 15:01     | 06:02 | 0.08 | 151  |
| 24:02 | 04:01 | 15:57     | 04:06     | 03:02 | 0.01 | 1036 |
| 24:02 | 04:01 | 35:01     | 04:05     | 04:01 | 0.02 | 572  |
| 24:02 | 04:01 | 35:01     | 09:01     | 03:03 | 0.02 | 572  |
| 24:02 | 04:01 | 35:01     | 14:05     | 05:03 | 0.01 | 1036 |
| 24:02 | 04:01 | 35:01     | 15:01     | 06:02 | 0.02 | 572  |
| 24:02 | 04:01 | 35:02     | 11:04     | 03:01 | 0.05 | 286  |
| 24:02 | 04:01 | 35:05     | 12:02     | 03:01 | 0.01 | 1036 |
| 24:02 | 04:01 | 35:05     | 14:04     | 05:03 | 0.01 | 1036 |
| 24:02 | 04:01 | 35:08     | 07:01     | 02:02 | 0.01 | 1036 |
| 24:02 | 04:01 | 40:01     | 09:01     | 03:03 | 0.02 | 572  |
| 24:02 | 04:01 | 40:01     | 12:02     | 03:01 | 0.02 | 572  |
| 24:02 | 04:01 | 40:02     | 16:02     | 05:02 | 0.01 | 1036 |
| 24:02 | 04:01 | 44:03     | 07:01     | 02:02 | 0.01 | 1036 |
| 24:02 | 04:01 | 44:03     | 14:07     | 05:02 | 0.01 | 1036 |
| 24:02 | 04:03 | 15:01     | 11:06     | 03:01 | 0.01 | 1036 |
| 24:02 | 04:03 | 15:12     | 15:01     | 05:02 | 0.01 | 1036 |
| 24:02 | 04:03 | 15:25     | 11:01     | 03:01 | 0.01 | 1036 |
| 24:02 | 04:03 | 15:25     | 12:02     | 03:01 | 0.05 | 286  |
| 24:02 | 04:03 | 15:25     | 12:02     | 03:03 | 0.01 | 1036 |
| 24:02 | 04:03 | 15:25     | 15:02     | 05:02 | 0.01 | 1036 |
| 24:02 | 04:03 | 27:06     | 12:02     | 03:01 | 0.01 | 1036 |
| 24:02 | 04:03 | 40:01     | 04:06     | 03:02 | 0.01 | 1036 |
| 24:02 | 05:01 | 44:02     | 01:01     | 05:01 | 0.01 | 1036 |
| 24:02 | 05:01 | 44:02     | 04:04     | 03:02 | 0.01 | 1036 |
| 24:02 | 05:01 | 44:02     | 13:01     | 06:03 | 0.01 | 1036 |
| 24:02 | 04:82 | 40:01     | 12:01:01G | 03:01 | 0.01 | 1036 |
| 24:02 | 06:02 | 13:02     | 07:01     | 02:02 | 0.16 | 59   |
| 24:02 | 06:02 | 13:02     | 08:03     | 06:01 | 0.01 | 1036 |
| 24:02 | 06:02 | 13:02     | 13:01     | 06:03 | 0.02 | 572  |
| 24:02 | 06:02 | 13:02     | 16:02     | 05:02 | 0.01 | 1036 |
| 24:02 | 06:02 | 37:01     | 07:01     | 02:02 | 0.01 | 1036 |
| 24:02 | 06:02 | 37:01     | 10:01     | 05:01 | 0.05 | 286  |
| 24:02 | 06:02 | 40:01     | 11:01     | 03:01 | 0.01 | 1036 |
| 24:02 | 06:02 | 50:01     | 03:01     | 02:01 | 0.01 | 1036 |
| 24:02 | 06:02 | 50:01     | 07:01     | 02:02 | 0.02 | 572  |
| 24:02 | 06:02 | 50:01     | 11:04     | 03:01 | 0.01 | 1036 |
| 24:02 | 06:02 | 57:01     | 07:01     | 02:02 | 0.01 | 1036 |
| 24:02 | 06:02 | 57:01     | 07:01     | 03:03 | 0.07 | 177  |
| 24:02 | 06:02 | 57:01     | 09:01     | 03:03 | 0.01 | 1036 |
| 24:02 | 06:02 | 57:01     | 13:01     | 06:03 | 0.02 | 572  |

|       |       |       |       |       |      |      |
|-------|-------|-------|-------|-------|------|------|
| 24:02 | 07:01 | 49:01 | 12:01 | 03:01 | 0.01 | 1036 |
| 24:02 | 07:01 | 49:01 | 13:02 | 06:04 | 0.02 | 572  |
| 24:02 | 07:02 | 07:02 | 01:01 | 05:01 | 0.02 | 572  |
| 24:02 | 07:02 | 07:02 | 04:01 | 03:02 | 0.01 | 1036 |
| 24:02 | 07:02 | 07:02 | 04:06 | 03:02 | 0.01 | 1036 |
| 24:02 | 07:02 | 07:02 | 07:01 | 02:02 | 0.01 | 1036 |
| 24:02 | 07:02 | 07:02 | 08:03 | 06:01 | 0.01 | 1036 |
| 24:02 | 07:02 | 07:02 | 11:01 | 03:01 | 0.01 | 1036 |
| 24:02 | 07:02 | 07:02 | 13:01 | 06:03 | 0.01 | 1036 |
| 24:02 | 07:02 | 07:02 | 15:01 | 06:02 | 0.10 | 115  |
| 24:02 | 07:02 | 08:01 | 03:01 | 02:01 | 0.09 | 130  |
| 24:02 | 07:02 | 13:01 | 12:02 | 03:01 | 0.03 | 409  |
| 24:02 | 07:02 | 13:01 | 14:03 | 03:01 | 0.01 | 1036 |
| 24:02 | 07:02 | 15:01 | 12:02 | 03:01 | 0.02 | 572  |
| 24:02 | 07:02 | 15:01 | 14:54 | 05:02 | 0.01 | 1036 |
| 24:02 | 07:02 | 15:25 | 12:02 | 03:01 | 0.01 | 1036 |
| 24:02 | 07:02 | 15:35 | 15:02 | 05:02 | 0.01 | 1036 |
| 24:02 | 07:02 | 38:02 | 08:03 | 06:01 | 0.05 | 286  |
| 24:02 | 07:02 | 38:02 | 09:01 | 03:03 | 0.01 | 1036 |
| 24:02 | 07:02 | 38:02 | 11:01 | 03:01 | 0.02 | 572  |
| 24:02 | 07:02 | 38:02 | 12:02 | 03:01 | 0.03 | 409  |
| 24:02 | 07:02 | 38:02 | 14:54 | 04:01 | 0.01 | 1036 |
| 24:02 | 07:02 | 38:02 | 15:02 | 05:01 | 0.02 | 572  |
| 24:02 | 07:02 | 38:02 | 16:02 | 05:02 | 0.05 | 286  |
| 24:02 | 07:02 | 39:01 | 04:03 | 03:02 | 0.01 | 1036 |
| 24:02 | 07:02 | 39:01 | 04:06 | 03:02 | 0.01 | 1036 |
| 24:02 | 07:02 | 39:01 | 08:02 | 04:02 | 0.01 | 1036 |
| 24:02 | 07:02 | 39:01 | 08:03 | 06:01 | 0.19 | 50   |
| 24:02 | 07:02 | 39:01 | 09:01 | 03:03 | 0.03 | 409  |
| 24:02 | 07:02 | 39:01 | 11:01 | 03:01 | 0.01 | 1036 |
| 24:02 | 07:02 | 39:01 | 12:01 | 03:01 | 0.01 | 1036 |
| 24:02 | 07:02 | 39:01 | 12:02 | 03:01 | 0.03 | 409  |
| 24:02 | 07:02 | 39:01 | 14:05 | 05:03 | 0.01 | 1036 |
| 24:02 | 07:02 | 39:01 | 15:01 | 06:02 | 0.02 | 572  |
| 24:02 | 07:02 | 39:05 | 04:03 | 03:02 | 0.01 | 1036 |
| 24:02 | 07:02 | 39:05 | 14:54 | 05:03 | 0.01 | 1036 |
| 24:02 | 07:02 | 40:01 | 03:01 | 02:01 | 0.01 | 1036 |
| 24:02 | 07:02 | 40:01 | 04:03 | 03:02 | 0.01 | 1036 |
| 24:02 | 07:02 | 40:01 | 04:04 | 03:02 | 0.01 | 1036 |
| 24:02 | 07:02 | 40:01 | 04:05 | 03:02 | 0.03 | 409  |
| 24:02 | 07:02 | 40:01 | 04:05 | 04:01 | 0.06 | 218  |
| 24:02 | 07:02 | 40:01 | 04:06 | 03:02 | 0.02 | 572  |
| 24:02 | 07:02 | 40:01 | 07:01 | 02:02 | 0.01 | 1036 |
| 24:02 | 07:02 | 40:01 | 08:03 | 06:01 | 0.22 | 42   |
| 24:02 | 07:02 | 40:01 | 09:01 | 03:02 | 0.02 | 572  |
| 24:02 | 07:02 | 40:01 | 09:01 | 03:03 | 0.16 | 59   |
| 24:02 | 07:02 | 40:01 | 10:01 | 05:01 | 0.01 | 1036 |
| 24:02 | 07:02 | 40:01 | 11:01 | 03:01 | 0.01 | 1036 |
| 24:02 | 07:02 | 40:01 | 11:06 | 03:01 | 0.01 | 1036 |
| 24:02 | 07:02 | 40:01 | 12:01 | 03:01 | 0.07 | 177  |
| 24:02 | 07:02 | 40:01 | 12:02 | 03:01 | 0.06 | 218  |
| 24:02 | 07:02 | 40:01 | 13:12 | 03:01 | 0.01 | 1036 |
| 24:02 | 07:02 | 40:01 | 14:05 | 05:03 | 0.02 | 572  |
| 24:02 | 07:02 | 40:01 | 14:07 | 05:03 | 0.01 | 1036 |
| 24:02 | 07:02 | 40:01 | 14:54 | 05:02 | 0.01 | 1036 |
| 24:02 | 07:02 | 40:01 | 14:54 | 05:03 | 0.01 | 1036 |
| 24:02 | 07:02 | 40:01 | 15:01 | 05:02 | 0.01 | 1036 |
| 24:02 | 07:02 | 40:01 | 15:01 | 06:02 | 0.03 | 409  |
| 24:02 | 07:02 | 40:02 | 09:01 | 03:03 | 0.01 | 1036 |
| 24:02 | 07:02 | 40:02 | 11:01 | 03:02 | 0.01 | 1036 |
| 24:02 | 07:02 | 48:01 | 15:01 | 06:02 | 0.01 | 1036 |
| 24:02 | 07:02 | 51:02 | 08:03 | 06:01 | 0.01 | 1036 |
| 24:02 | 07:02 | 52:01 | 12:02 | 05:02 | 0.01 | 1036 |

|       |       |       |       |       |      |      |
|-------|-------|-------|-------|-------|------|------|
| 24:02 | 07:02 | 52:01 | 14:04 | 05:03 | 0.01 | 1036 |
| 24:02 | 07:02 | 54:01 | 04:05 | 04:01 | 0.01 | 1036 |
| 24:02 | 07:02 | 55:02 | 09:01 | 03:03 | 0.01 | 1036 |
| 24:02 | 07:02 | 56:01 | 08:03 | 06:01 | 0.01 | 1036 |
| 24:02 | 07:02 | 56:01 | 09:01 | 03:03 | 0.02 | 572  |
| 24:02 | 07:02 | 56:01 | 11:01 | 03:01 | 0.01 | 1036 |
| 24:02 | 07:02 | 56:01 | 14:03 | 03:01 | 0.01 | 1036 |
| 24:02 | 07:02 | 67:01 | 08:03 | 06:01 | 0.01 | 1036 |
| 24:02 | 07:02 | 67:01 | 11:01 | 03:01 | 0.01 | 1036 |
| 24:02 | 07:02 | 67:01 | 12:10 | 03:01 | 0.01 | 1036 |
| 24:02 | 07:02 | 67:01 | 15:01 | 06:02 | 0.02 | 572  |
| 24:02 | 07:02 | 67:01 | 16:02 | 05:02 | 0.02 | 572  |
| 24:02 | 07:04 | 15:18 | 04:01 | 03:01 | 0.03 | 409  |
| 24:02 | 07:04 | 15:18 | 04:06 | 03:02 | 0.01 | 1036 |
| 24:02 | 07:04 | 15:18 | 11:01 | 03:01 | 0.01 | 1036 |
| 24:02 | 07:04 | 15:18 | 12:01 | 03:01 | 0.01 | 1036 |
| 24:02 | 07:04 | 15:18 | 12:02 | 03:01 | 0.01 | 1036 |
| 24:02 | 07:04 | 15:18 | 15:01 | 06:02 | 0.01 | 1036 |
| 24:02 | 08:01 | 13:01 | 12:02 | 03:01 | 0.01 | 1036 |
| 24:02 | 08:01 | 15:01 | 04:03 | 03:02 | 0.01 | 1036 |
| 24:02 | 08:01 | 15:02 | 12:02 | 03:01 | 0.17 | 54   |
| 24:02 | 08:01 | 15:02 | 14:05 | 05:03 | 0.01 | 1036 |
| 24:02 | 08:01 | 15:02 | 15:01 | 05:02 | 0.01 | 1036 |
| 24:02 | 08:01 | 15:18 | 04:04 | 03:02 | 0.01 | 1036 |
| 24:02 | 08:01 | 15:18 | 09:01 | 03:03 | 0.02 | 572  |
| 24:02 | 08:01 | 15:18 | 12:02 | 03:01 | 0.01 | 1036 |
| 24:02 | 08:01 | 15:18 | 15:01 | 06:02 | 0.03 | 409  |
| 24:02 | 08:01 | 35:01 | 04:05 | 04:01 | 0.01 | 1036 |
| 24:02 | 08:01 | 35:01 | 09:01 | 03:03 | 0.05 | 286  |
| 24:02 | 08:01 | 40:01 | 09:01 | 03:03 | 0.01 | 1036 |
| 24:02 | 08:01 | 40:06 | 03:01 | 02:01 | 0.02 | 572  |
| 24:02 | 08:01 | 40:06 | 04:06 | 03:02 | 0.01 | 1036 |
| 24:02 | 08:01 | 40:06 | 07:01 | 02:02 | 0.01 | 1036 |
| 24:02 | 08:01 | 40:06 | 08:03 | 06:01 | 0.03 | 409  |
| 24:02 | 08:01 | 40:06 | 11:01 | 03:01 | 0.02 | 572  |
| 24:02 | 08:01 | 40:06 | 12:01 | 03:01 | 0.05 | 286  |
| 24:02 | 08:01 | 40:06 | 14:05 | 05:03 | 0.01 | 1036 |
| 24:02 | 08:01 | 48:01 | 04:10 | 04:02 | 0.01 | 1036 |
| 24:02 | 08:01 | 48:01 | 09:01 | 03:03 | 0.07 | 177  |
| 24:02 | 08:01 | 48:01 | 11:01 | 03:01 | 0.06 | 218  |
| 24:02 | 08:01 | 48:01 | 12:02 | 03:01 | 0.01 | 1036 |
| 24:02 | 08:01 | 48:01 | 14:05 | 05:03 | 0.02 | 572  |
| 24:02 | 08:01 | 48:01 | 14:44 | 05:03 | 0.01 | 1036 |
| 24:02 | 08:01 | 48:03 | 12:02 | 03:01 | 0.02 | 572  |
| 24:02 | 08:01 | 48:03 | 14:05 | 05:03 | 0.05 | 286  |
| 24:02 | 08:01 | 54:01 | 04:05 | 04:01 | 0.02 | 572  |
| 24:02 | 08:01 | 55:02 | 12:02 | 03:01 | 0.01 | 1036 |
| 24:02 | 08:01 | 55:02 | 14:05 | 05:03 | 0.01 | 1036 |
| 24:02 | 08:01 | 58:01 | 13:02 | 06:09 | 0.01 | 1036 |
| 24:02 | 08:03 | 40:01 | 04:05 | 04:01 | 0.01 | 1036 |
| 24:02 | 08:03 | 48:01 | 04:03 | 03:02 | 0.01 | 1036 |
| 24:02 | 08:03 | 48:01 | 04:05 | 04:01 | 0.02 | 572  |
| 24:02 | 08:03 | 48:01 | 04:06 | 03:02 | 0.01 | 1036 |
| 24:02 | 08:03 | 48:01 | 04:10 | 04:02 | 0.01 | 1036 |
| 24:02 | 08:03 | 48:01 | 09:01 | 03:03 | 0.05 | 286  |
| 24:02 | 08:03 | 48:01 | 12:02 | 03:01 | 0.01 | 1036 |
| 24:02 | 08:03 | 48:01 | 13:03 | 03:01 | 0.01 | 1036 |
| 24:02 | 08:03 | 48:01 | 14:03 | 06:02 | 0.01 | 1036 |
| 24:02 | 08:03 | 48:01 | 14:05 | 05:03 | 0.01 | 1036 |
| 24:02 | 08:03 | 48:01 | 14:07 | 05:02 | 0.01 | 1036 |
| 24:02 | 08:03 | 48:01 | 14:54 | 05:02 | 0.02 | 572  |
| 24:02 | 08:03 | 48:01 | 15:01 | 03:01 | 0.09 | 130  |
| 24:02 | 07:66 | 40:01 | 03:01 | 02:01 | 0.01 | 1036 |

|       |       |       |                      |       |      |             |
|-------|-------|-------|----------------------|-------|------|-------------|
| 24:02 | 07:66 | 40:01 | 12:02                | 03:01 | 0.05 | <b>286</b>  |
| 24:02 | 07:66 | 40:01 | 14:05                | 05:03 | 0.01 | <b>1036</b> |
| 24:02 | 08:22 | 40:06 | 13:01                | 06:03 | 0.01 | <b>1036</b> |
| 24:02 | 08:22 | 48:01 | 08:03                | 06:01 | 0.02 | <b>572</b>  |
| 24:02 | 08:22 | 48:01 | 15:01                | 06:04 | 0.01 | <b>1036</b> |
| 24:02 | 12:02 | 27:04 | 04:03                | 03:02 | 0.01 | <b>1036</b> |
| 24:02 | 12:02 | 27:04 | 04:07                | 03:02 | 0.01 | <b>1036</b> |
| 24:02 | 12:02 | 27:04 | 07:01                | 03:03 | 0.01 | <b>1036</b> |
| 24:02 | 12:02 | 27:04 | 08:03                | 06:01 | 0.01 | <b>1036</b> |
| 24:02 | 12:02 | 27:04 | 11:01                | 03:01 | 0.01 | <b>1036</b> |
| 24:02 | 12:02 | 27:04 | 12:02                | 03:01 | 0.06 | <b>218</b>  |
| 24:02 | 12:02 | 27:04 | 14:54                | 05:02 | 0.01 | <b>1036</b> |
| 24:02 | 12:02 | 52:01 | 04:05                | 04:01 | 0.02 | <b>572</b>  |
| 24:02 | 12:02 | 52:01 | 09:01                | 03:03 | 0.01 | <b>1036</b> |
| 24:02 | 12:02 | 52:01 | 14:54                | 05:02 | 0.01 | <b>1036</b> |
| 24:02 | 12:02 | 52:01 | 15:02                | 06:01 | 0.02 | <b>572</b>  |
| 24:02 | 12:03 | 18:01 | 11:04                | 03:01 | 0.01 | <b>1036</b> |
| 24:02 | 12:03 | 35:03 | 04:01                | 03:02 | 0.01 | <b>1036</b> |
| 24:02 | 12:03 | 35:03 | 13:01                | 06:03 | 0.02 | <b>572</b>  |
| 24:02 | 12:03 | 35:03 | 14:54                | 05:03 | 0.01 | <b>1036</b> |
| 24:02 | 12:03 | 35:03 | 15:02                | 05:03 | 0.01 | <b>1036</b> |
| 24:02 | 12:03 | 40:01 | 15:01                | 05:02 | 0.02 | <b>572</b>  |
| 24:02 | 12:03 | 50:01 | 03:01                | 02:01 | 0.01 | <b>1036</b> |
| 24:02 | 12:03 | 55:02 | 04:05                | 04:01 | 0.01 | <b>1036</b> |
| 24:02 | 12:03 | 55:02 | 09:01                | 03:03 | 0.01 | <b>1036</b> |
| 24:02 | 12:03 | 55:02 | 13:12                | 03:01 | 0.01 | <b>1036</b> |
| 24:02 | 12:03 | 55:02 | 14:05                | 05:03 | 0.01 | <b>1036</b> |
| 24:02 | 12:03 | 55:02 | 12:01:01G            | 03:01 | 0.01 | <b>1036</b> |
| 24:02 | 14:02 | 15:01 | 15:01                | 06:02 | 0.01 | <b>1036</b> |
| 24:02 | 14:02 | 35:05 | 12:02                | 03:01 | 0.01 | <b>1036</b> |
| 24:02 | 14:02 | 40:01 | 04:05                | 04:01 | 0.01 | <b>1036</b> |
| 24:02 | 14:02 | 40:01 | 15:01                | 06:02 | 0.01 | <b>1036</b> |
| 24:02 | 14:02 | 40:02 | 15:01                | 06:02 | 0.01 | <b>1036</b> |
| 24:02 | 14:02 | 40:06 | 08:03                | 06:01 | 0.01 | <b>1036</b> |
| 24:02 | 14:02 | 40:06 | 09:01                | 03:03 | 0.01 | <b>1036</b> |
| 24:02 | 14:02 | 46:01 | 12:02                | 03:01 | 0.01 | <b>1036</b> |
| 24:02 | 14:02 | 51:01 | 03:01                | 02:01 | 0.02 | <b>572</b>  |
| 24:02 | 14:02 | 51:01 | 04:03                | 03:02 | 0.03 | <b>409</b>  |
| 24:02 | 14:02 | 51:01 | 04:05                | 04:01 | 0.02 | <b>572</b>  |
| 24:02 | 14:02 | 51:01 | 07:01                | 02:02 | 0.01 | <b>1036</b> |
| 24:02 | 14:02 | 51:01 | 08:02                | 03:02 | 0.01 | <b>1036</b> |
| 24:02 | 14:02 | 51:01 | 08:03                | 06:01 | 0.05 | <b>286</b>  |
| 24:02 | 14:02 | 51:01 | 08:09                | 04:02 | 0.01 | <b>1036</b> |
| 24:02 | 14:02 | 51:01 | 09:01                | 03:03 | 0.48 | <b>14</b>   |
| 24:02 | 14:02 | 51:01 | 11:01                | 03:01 | 0.06 | <b>218</b>  |
| 24:02 | 14:02 | 51:01 | 12:01                | 03:02 | 0.01 | <b>1036</b> |
| 24:02 | 14:02 | 51:01 | 12:02                | 03:01 | 0.07 | <b>177</b>  |
| 24:02 | 14:02 | 51:01 | 13:02                | 06:04 | 0.03 | <b>409</b>  |
| 24:02 | 14:02 | 51:01 | 13:02                | 06:09 | 0.01 | <b>1036</b> |
| 24:02 | 14:02 | 51:01 | 13:12                | 03:01 | 0.01 | <b>1036</b> |
| 24:02 | 14:02 | 51:01 | 14:03                | 03:01 | 0.06 | <b>218</b>  |
| 24:02 | 14:02 | 51:01 | 14:05                | 05:03 | 0.01 | <b>1036</b> |
| 24:02 | 14:02 | 51:01 | 15:01                | 06:02 | 0.09 | <b>130</b>  |
| 24:02 | 14:02 | 51:01 | 16:02                | 05:02 | 0.07 | <b>177</b>  |
| 24:02 | 14:02 | 51:01 | 12:01(2)<br>12:10(1) | 03:01 | 0.03 | <b>409</b>  |
| 24:02 | 14:02 | 54:01 | 08:03                | 06:01 | 0.01 | <b>1036</b> |
| 24:02 | 14:02 | 55:02 | 11:01                | 03:01 | 0.01 | <b>1036</b> |
| 24:02 | 14:03 | 44:03 | 13:02                | 06:04 | 0.03 | <b>409</b>  |
| 24:02 | 15:02 | 27:04 | 11:01                | 03:01 | 0.01 | <b>1036</b> |
| 24:02 | 15:02 | 27:07 | 07:01                | 02:02 | 0.01 | <b>1036</b> |
| 24:02 | 15:02 | 27:07 | 11:01                | 03:01 | 0.01 | <b>1036</b> |
| 24:02 | 15:02 | 27:07 | 15:01                | 06:02 | 0.02 | <b>572</b>  |

|       |                          |        |           |       |      |      |
|-------|--------------------------|--------|-----------|-------|------|------|
| 24:02 | 15:02                    | 35:01  | 15:01     | 06:02 | 0.01 | 1036 |
| 24:02 | 15:02                    | 40:01  | 03:01     | 02:01 | 0.01 | 1036 |
| 24:02 | 15:02                    | 40:01  | 09:01     | 03:03 | 0.01 | 1036 |
| 24:02 | 15:02                    | 40:01  | 11:01     | 03:01 | 0.01 | 1036 |
| 24:02 | 15:02                    | 40:01  | 15:01     | 06:02 | 0.02 | 572  |
| 24:02 | 15:02                    | 40:01  | 16:02     | 05:02 | 0.01 | 1036 |
| 24:02 | 15:02                    | 40:02  | 12:01     | 03:01 | 0.01 | 1036 |
| 24:02 | 15:02                    | 48:01  | 15:01     | 06:01 | 0.05 | 286  |
| 24:02 | 15:02                    | 51:01  | 04:05     | 04:01 | 0.01 | 1036 |
| 24:02 | 15:02                    | 51:01  | 04:10     | 04:02 | 0.01 | 1036 |
| 24:02 | 15:02                    | 51:01  | 08:03     | 06:01 | 0.02 | 572  |
| 24:02 | 15:02                    | 51:01  | 09:01     | 03:03 | 0.01 | 1036 |
| 24:02 | 15:02                    | 51:01  | 11:01     | 03:01 | 0.01 | 1036 |
| 24:02 | 15:02                    | 51:01  | 11:01     | 03:13 | 0.01 | 1036 |
| 24:02 | 15:02                    | 51:01  | 12:02     | 03:01 | 0.01 | 1036 |
| 24:02 | 15:02                    | 51:01  | 14:03     | 03:01 | 0.01 | 1036 |
| 24:02 | 15:02                    | 51:01  | 14:54     | 05:02 | 0.01 | 1036 |
| 24:02 | 15:02                    | 51:01  | 14:54     | 05:03 | 0.01 | 1036 |
| 24:02 | 15:02                    | 51:01  | 16:02     | 05:02 | 0.01 | 1036 |
| 24:02 | 15:02                    | 51:02  | 08:02     | 04:02 | 0.01 | 1036 |
| 24:02 | 15:02                    | 51:02  | 08:03     | 06:01 | 0.02 | 572  |
| 24:02 | 15:02                    | 51:02  | 09:01     | 03:03 | 0.01 | 1036 |
| 24:02 | 15:02                    | 51:02  | 11:01     | 03:01 | 0.02 | 572  |
| 24:02 | 15:02                    | 51:02  | 12:01     | 03:01 | 0.01 | 1036 |
| 24:02 | 15:02                    | 51:02  | 12:02     | 03:01 | 0.03 | 409  |
| 24:02 | 15:02                    | 51:02  | 13:07     | 03:01 | 0.01 | 1036 |
| 24:02 | 15:02                    | 51:02  | 14:54     | 05:02 | 0.03 | 409  |
| 24:02 | 15:02                    | 51:02  | 14:54     | 05:03 | 0.01 | 1036 |
| 24:02 | 15:02                    | 51:02  | 15:01     | 06:02 | 0.03 | 409  |
| 24:02 | 15:02                    | 56:01  | 12:01     | 03:01 | 0.01 | 1036 |
| 24:02 | 15:05                    | 07:05  | 04:07     | 03:01 | 0.01 | 1036 |
| 24:02 | 16:04                    | 35:03  | 04:05     | 04:01 | 0.01 | 1036 |
| 24:02 | 17:03                    | 41:02  | 13:03     | 03:01 | 0.01 | 1036 |
| 24:02 | 04:01(2)<br>04:82(4)     | 40:01  | 04:03     | 03:02 | 0.07 | 177  |
| 24:02 | 04:01:01G                | 15:01  | 08:03     | 06:01 | 0.01 | 1036 |
| 24:02 | 04:01:01G                | 15:27  | 04:04     | 03:02 | 0.01 | 1036 |
| 24:02 | 04:01:01G                | 35:03  | 11:01     | 03:01 | 0.01 | 1036 |
| 24:02 | 04:01:01G                | 40:01  | 09:01     | 03:02 | 0.01 | 1036 |
| 24:02 | 04:01:01G(1)<br>04:01(1) | 15:27  | 08:02     | 04:02 | 0.02 | 572  |
| 24:02 | 08:01(1)<br>08:22(1)     | 40:06  | 04:05     | 04:01 | 0.02 | 572  |
| 24:02 | 08:01(22)<br>08:22(3)    | 40:06  | 09:01     | 03:03 | 0.29 | 33   |
| 24:02 | 08:01(7)<br>08:22(1)     | 40:06  | 15:01     | 06:02 | 0.09 | 130  |
| 24:02 | 08:01:01G                | 15:01  | 08:03     | 06:01 | 0.01 | 1036 |
| 24:02 | 08:01:01G                | 15:01  | 15:01     | 06:02 | 0.01 | 1036 |
| 24:02 | 08:01:01G                | 15:02  | 09:01     | 03:03 | 0.02 | 572  |
| 24:02 | 08:01:01G                | 15:02  | 12:01:01G | 03:01 | 0.01 | 1036 |
| 24:02 | 08:01:01G                | 15:13  | 12:02     | 03:01 | 0.01 | 1036 |
| 24:02 | 08:01:01G                | 15:18  | 04:05     | 04:01 | 0.01 | 1036 |
| 24:02 | 08:01:01G                | 15:18  | 16:02     | 05:02 | 0.01 | 1036 |
| 24:02 | 08:01:01G                | 40:06  | 04:10     | 04:02 | 0.02 | 572  |
| 24:02 | 08:01:01G                | 40:06  | 07:01     | 03:03 | 0.01 | 1036 |
| 24:02 | 08:01:01G                | 40:06  | 12:01:01G | 05:03 | 0.01 | 1036 |
| 24:02 | 08:01:01G                | 48:03  | 11:01     | 03:01 | 0.01 | 1036 |
| 24:02 | 08:01:01G                | 40:268 | 15:01     | 06:02 | 0.01 | 1036 |
| 24:02 | 08:01:01G(1)<br>08:01(1) | 15:02  | 15:01     | 06:01 | 0.02 | 572  |
| 24:02 | 08:01:01G(1)<br>08:01(1) | 48:01  | 04:05     | 04:01 | 0.02 | 572  |



|       |                                      |       |                          |       |      |             |
|-------|--------------------------------------|-------|--------------------------|-------|------|-------------|
| 24:02 | 08:01:01G(1)<br>08:01(1)             | 48:01 | 04:05                    | 04:02 | 0.02 | <b>572</b>  |
| 24:02 | 08:01:01G(1)<br>08:01(1)<br>08:22(2) | 48:01 | 14:54                    | 05:02 | 0.05 | <b>286</b>  |
| 24:02 | 08:01:01G(1)<br>08:01(1)<br>08:22(2) | 48:01 | 15:01                    | 06:02 | 0.05 | <b>286</b>  |
| 24:02 | 08:01:01G(1)<br>08:22(1)             | 48:01 | 16:02                    | 05:02 | 0.02 | <b>572</b>  |
| 24:02 | 08:01:01G(2)<br>08:01(1)             | 15:18 | 11:01                    | 03:01 | 0.03 | <b>409</b>  |
| 24:03 | 03:02                                | 58:01 | 03:01                    | 02:01 | 0.01 | <b>1036</b> |
| 24:03 | 03:02                                | 58:01 | 08:03                    | 06:01 | 0.01 | <b>1036</b> |
| 24:03 | 03:03                                | 15:01 | 15:01                    | 06:02 | 0.01 | <b>1036</b> |
| 24:03 | 03:03                                | 15:12 | 07:01                    | 02:02 | 0.02 | <b>572</b>  |
| 24:03 | 03:03                                | 15:12 | 08:03                    | 06:01 | 0.01 | <b>1036</b> |
| 24:03 | 03:03                                | 15:12 | 12:02                    | 03:01 | 0.01 | <b>1036</b> |
| 24:03 | 03:03                                | 15:12 | 12:01:01G                | 03:01 | 0.01 | <b>1036</b> |
| 24:03 | 03:03                                | 35:01 | 07:01                    | 03:03 | 0.01 | <b>1036</b> |
| 24:03 | 06:02                                | 57:01 | 07:01                    | 03:03 | 0.01 | <b>1036</b> |
| 24:03 | 08:01:01G                            | 35:01 | 11:01                    | 03:01 | 0.01 | <b>1036</b> |
| 24:04 | 03:03                                | 15:01 | 12:02                    | 03:01 | 0.01 | <b>1036</b> |
| 24:07 | 01:02                                | 40:02 | 09:01                    | 03:03 | 0.01 | <b>1036</b> |
| 24:07 | 03:03                                | 15:11 | 12:02                    | 03:01 | 0.01 | <b>1036</b> |
| 24:07 | 03:04                                | 27:06 | 12:02                    | 03:01 | 0.01 | <b>1036</b> |
| 24:07 | 04:01                                | 35:05 | 04:05                    | 04:01 | 0.01 | <b>1036</b> |
| 24:07 | 04:01                                | 35:05 | 08:03                    | 06:01 | 0.01 | <b>1036</b> |
| 24:07 | 04:01                                | 35:05 | 09:01                    | 03:03 | 0.01 | <b>1036</b> |
| 24:07 | 04:01                                | 35:05 | 12:02                    | 03:01 | 0.14 | <b>76</b>   |
| 24:07 | 04:01                                | 35:05 | 14:05                    | 05:03 | 0.01 | <b>1036</b> |
| 24:07 | 04:01                                | 35:05 | 14:54                    | 05:02 | 0.01 | <b>1036</b> |
| 24:07 | 04:01                                | 35:05 | 15:01                    | 05:02 | 0.01 | <b>1036</b> |
| 24:07 | 07:02                                | 27:06 | 08:03                    | 06:01 | 0.02 | <b>572</b>  |
| 24:07 | 08:01                                | 15:02 | 15:01                    | 06:01 | 0.01 | <b>1036</b> |
| 24:08 | 03:03                                | 48:01 | 14:54                    | 05:03 | 0.01 | <b>1036</b> |
| 24:08 | 03:03                                | 48:01 | 15:01                    | 03:01 | 0.01 | <b>1036</b> |
| 24:08 | 03:03                                | 48:03 | 14:03                    | 03:01 | 0.01 | <b>1036</b> |
| 24:08 | 06:02                                | 37:01 | 10:01                    | 05:01 | 0.01 | <b>1036</b> |
| 24:08 | 07:04                                | 15:18 | 11:01                    | 03:01 | 0.01 | <b>1036</b> |
| 24:10 | 07:04                                | 18:02 | 12:02                    | 03:01 | 0.03 | <b>409</b>  |
| 24:10 | 07:04                                | 18:02 | 15:02                    | 05:01 | 0.01 | <b>1036</b> |
| 24:10 | 04:01:01G                            | 35:05 | 09:01                    | 03:03 | 0.01 | <b>1036</b> |
| 24:20 | 01:02                                | 46:01 | 12:01                    | 03:01 | 0.01 | <b>1036</b> |
| 24:20 | 01:06                                | 55:02 | 12:02                    | 03:01 | 0.01 | <b>1036</b> |
| 24:20 | 03:02                                | 58:01 | 12:02                    | 03:01 | 0.01 | <b>1036</b> |
| 24:20 | 03:04                                | 13:01 | 09:01                    | 03:03 | 0.01 | <b>1036</b> |
| 24:20 | 03:04                                | 13:01 | 14:07                    | 05:03 | 0.01 | <b>1036</b> |
| 24:20 | 04:01                                | 40:02 | 04:06                    | 03:02 | 0.01 | <b>1036</b> |
| 24:20 | 04:82                                | 40:01 | 15:01                    | 06:02 | 0.01 | <b>1036</b> |
| 24:20 | 07:02                                | 07:02 | 15:01                    | 06:02 | 0.01 | <b>1036</b> |
| 24:20 | 07:02                                | 40:01 | 08:03                    | 06:01 | 0.06 | <b>218</b>  |
| 24:20 | 07:02                                | 40:01 | 15:01                    | 06:02 | 0.01 | <b>1036</b> |
| 24:20 | 07:02                                | 40:01 | 12:01:01G(1)<br>12:01(1) | 03:01 | 0.02 | <b>572</b>  |
| 24:20 | 08:01                                | 15:02 | 15:01                    | 06:01 | 0.01 | <b>1036</b> |
| 24:20 | 08:01                                | 40:06 | 09:01                    | 03:03 | 0.01 | <b>1036</b> |
| 24:20 | 12:02                                | 27:04 | 12:02                    | 03:01 | 0.01 | <b>1036</b> |
| 24:20 | 14:02                                | 51:01 | 07:01                    | 02:02 | 0.01 | <b>1036</b> |
| 24:20 | 14:02                                | 51:01 | 07:01                    | 03:03 | 0.01 | <b>1036</b> |
| 24:20 | 15:02                                | 27:07 | 11:01                    | 03:01 | 0.01 | <b>1036</b> |
| 24:20 | 04:01:01G                            | 40:01 | 04:07                    | 03:02 | 0.01 | <b>1036</b> |
| 24:20 | 04:01:01G                            | 40:01 | 14:54                    | 05:03 | 0.01 | <b>1036</b> |
| 25:01 | 03:04                                | 40:02 | 13:02                    | 06:04 | 0.01 | <b>1036</b> |

|       |       |       |       |       |      |      |
|-------|-------|-------|-------|-------|------|------|
| 25:01 | 12:03 | 18:01 | 11:01 | 03:01 | 0.01 | 1036 |
| 26:01 | 01:02 | 15:01 | 04:06 | 03:02 | 0.01 | 1036 |
| 26:01 | 01:02 | 15:01 | 12:01 | 03:01 | 0.02 | 572  |
| 26:01 | 01:02 | 15:01 | 13:02 | 06:04 | 0.01 | 1036 |
| 26:01 | 01:02 | 15:01 | 14:05 | 05:03 | 0.01 | 1036 |
| 26:01 | 01:02 | 15:01 | 15:01 | 06:02 | 0.01 | 1036 |
| 26:01 | 01:02 | 15:18 | 09:01 | 03:03 | 0.01 | 1036 |
| 26:01 | 01:02 | 35:01 | 04:03 | 03:02 | 0.01 | 1036 |
| 26:01 | 01:02 | 40:02 | 09:01 | 03:03 | 0.01 | 1036 |
| 26:01 | 01:02 | 46:01 | 04:05 | 04:01 | 0.01 | 1036 |
| 26:01 | 01:02 | 46:01 | 08:03 | 06:01 | 0.01 | 1036 |
| 26:01 | 01:02 | 46:01 | 09:01 | 03:03 | 0.12 | 97   |
| 26:01 | 01:02 | 46:01 | 15:02 | 05:01 | 0.01 | 1036 |
| 26:01 | 01:02 | 51:01 | 11:01 | 03:01 | 0.01 | 1036 |
| 26:01 | 01:02 | 51:02 | 08:02 | 04:02 | 0.01 | 1036 |
| 26:01 | 01:02 | 54:01 | 04:05 | 04:01 | 0.06 | 218  |
| 26:01 | 01:02 | 55:02 | 08:03 | 06:01 | 0.01 | 1036 |
| 26:01 | 01:02 | 55:02 | 09:01 | 03:03 | 0.02 | 572  |
| 26:01 | 01:02 | 55:02 | 11:01 | 03:01 | 0.01 | 1036 |
| 26:01 | 01:02 | 55:02 | 12:02 | 03:01 | 0.01 | 1036 |
| 26:01 | 01:02 | 55:02 | 13:02 | 06:09 | 0.01 | 1036 |
| 26:01 | 01:02 | 55:02 | 14:07 | 05:02 | 0.02 | 572  |
| 26:01 | 01:02 | 56:01 | 12:01 | 03:01 | 0.01 | 1036 |
| 26:01 | 01:02 | 59:01 | 04:03 | 03:02 | 0.01 | 1036 |
| 26:01 | 03:02 | 58:01 | 03:01 | 02:01 | 0.02 | 572  |
| 26:01 | 03:02 | 58:01 | 13:02 | 06:09 | 0.02 | 572  |
| 26:01 | 03:02 | 58:01 | 15:01 | 05:03 | 0.01 | 1036 |
| 26:01 | 03:03 | 15:01 | 04:05 | 04:01 | 0.01 | 1036 |
| 26:01 | 03:03 | 15:01 | 08:03 | 06:01 | 0.02 | 572  |
| 26:01 | 03:03 | 15:01 | 11:01 | 03:01 | 0.01 | 1036 |
| 26:01 | 03:03 | 15:01 | 11:01 | 03:13 | 0.01 | 1036 |
| 26:01 | 03:03 | 15:01 | 12:02 | 03:01 | 0.01 | 1036 |
| 26:01 | 03:03 | 15:01 | 12:08 | 03:01 | 0.01 | 1036 |
| 26:01 | 03:03 | 15:01 | 15:01 | 06:02 | 0.01 | 1036 |
| 26:01 | 03:03 | 15:11 | 08:03 | 06:01 | 0.01 | 1036 |
| 26:01 | 03:03 | 15:11 | 09:01 | 03:03 | 0.01 | 1036 |
| 26:01 | 03:03 | 15:11 | 15:01 | 06:02 | 0.02 | 572  |
| 26:01 | 03:03 | 15:12 | 15:02 | 05:02 | 0.02 | 572  |
| 26:01 | 03:03 | 35:01 | 07:01 | 02:02 | 0.01 | 1036 |
| 26:01 | 03:03 | 35:01 | 08:03 | 06:01 | 0.01 | 1036 |
| 26:01 | 03:03 | 35:01 | 09:01 | 03:03 | 0.05 | 286  |
| 26:01 | 03:03 | 35:01 | 11:01 | 03:01 | 0.02 | 572  |
| 26:01 | 03:03 | 35:01 | 14:05 | 05:03 | 0.01 | 1036 |
| 26:01 | 03:03 | 35:01 | 14:54 | 05:03 | 0.01 | 1036 |
| 26:01 | 03:03 | 39:01 | 03:01 | 02:01 | 0.01 | 1036 |
| 26:01 | 03:03 | 40:02 | 09:01 | 03:03 | 0.01 | 1036 |
| 26:01 | 03:03 | 40:02 | 14:54 | 05:03 | 0.01 | 1036 |
| 26:01 | 03:03 | 40:02 | 15:01 | 06:02 | 0.02 | 572  |
| 26:01 | 03:03 | 55:02 | 04:04 | 03:02 | 0.01 | 1036 |
| 26:01 | 03:03 | 55:02 | 09:01 | 03:03 | 0.01 | 1036 |
| 26:01 | 03:03 | 55:02 | 12:02 | 03:01 | 0.01 | 1036 |
| 26:01 | 03:03 | 55:02 | 14:54 | 05:02 | 0.01 | 1036 |
| 26:01 | 03:04 | 13:01 | 11:01 | 03:01 | 0.01 | 1036 |
| 26:01 | 03:04 | 13:01 | 12:02 | 03:01 | 0.03 | 409  |
| 26:01 | 03:04 | 13:01 | 15:01 | 06:01 | 0.01 | 1036 |
| 26:01 | 03:04 | 13:01 | 15:04 | 05:02 | 0.01 | 1036 |
| 26:01 | 03:04 | 40:01 | 08:03 | 06:01 | 0.01 | 1036 |
| 26:01 | 03:04 | 40:01 | 11:01 | 03:01 | 0.01 | 1036 |
| 26:01 | 03:04 | 40:01 | 12:01 | 03:01 | 0.01 | 1036 |
| 26:01 | 03:04 | 40:01 | 15:01 | 06:01 | 0.02 | 572  |
| 26:01 | 03:04 | 40:01 | 15:01 | 06:02 | 0.01 | 1036 |
| 26:01 | 03:04 | 40:02 | 03:01 | 02:01 | 0.01 | 1036 |
| 26:01 | 03:04 | 40:02 | 04:03 | 03:02 | 0.01 | 1036 |

|       |       |        |       |       |      |             |
|-------|-------|--------|-------|-------|------|-------------|
| 26:01 | 03:04 | 40:02  | 04:04 | 03:02 | 0.01 | <b>1036</b> |
| 26:01 | 03:04 | 40:02  | 09:01 | 03:03 | 0.01 | <b>1036</b> |
| 26:01 | 03:04 | 40:02  | 11:01 | 03:01 | 0.01 | <b>1036</b> |
| 26:01 | 03:04 | 40:02  | 13:07 | 03:01 | 0.01 | <b>1036</b> |
| 26:01 | 03:04 | 40:02  | 14:05 | 05:03 | 0.01 | <b>1036</b> |
| 26:01 | 03:04 | 40:02  | 16:02 | 05:02 | 0.01 | <b>1036</b> |
| 26:01 | 03:04 | 40:03  | 09:01 | 03:03 | 0.01 | <b>1036</b> |
| 26:01 | 03:04 | 40:03  | 14:05 | 05:03 | 0.01 | <b>1036</b> |
| 26:01 | 03:04 | 40:06  | 04:05 | 04:01 | 0.05 | <b>286</b>  |
| 26:01 | 03:04 | 40:06  | 07:01 | 02:02 | 0.01 | <b>1036</b> |
| 26:01 | 03:04 | 40:06  | 08:03 | 06:01 | 0.02 | <b>572</b>  |
| 26:01 | 03:04 | 40:06  | 09:01 | 03:03 | 0.06 | <b>218</b>  |
| 26:01 | 03:04 | 40:06  | 14:05 | 05:03 | 0.01 | <b>1036</b> |
| 26:01 | 03:04 | 40:06  | 14:07 | 05:02 | 0.01 | <b>1036</b> |
| 26:01 | 04:01 | 15:01  | 01:01 | 05:01 | 0.01 | <b>1036</b> |
| 26:01 | 04:01 | 15:01  | 04:05 | 04:01 | 0.01 | <b>1036</b> |
| 26:01 | 04:01 | 15:01  | 11:01 | 03:01 | 0.01 | <b>1036</b> |
| 26:01 | 04:01 | 15:01  | 12:01 | 03:01 | 0.01 | <b>1036</b> |
| 26:01 | 04:01 | 15:01  | 16:02 | 05:02 | 0.01 | <b>1036</b> |
| 26:01 | 04:01 | 15:201 | 04:06 | 03:02 | 0.01 | <b>1036</b> |
| 26:01 | 04:01 | 35:01  | 09:01 | 03:03 | 0.01 | <b>1036</b> |
| 26:01 | 04:01 | 35:01  | 12:02 | 03:01 | 0.01 | <b>1036</b> |
| 26:01 | 04:01 | 35:01  | 14:54 | 05:02 | 0.01 | <b>1036</b> |
| 26:01 | 04:01 | 40:01  | 11:01 | 03:01 | 0.01 | <b>1036</b> |
| 26:01 | 04:03 | 15:25  | 11:06 | 03:01 | 0.01 | <b>1036</b> |
| 26:01 | 06:02 | 13:02  | 07:01 | 02:02 | 0.02 | <b>572</b>  |
| 26:01 | 06:02 | 37:01  | 11:01 | 03:01 | 0.01 | <b>1036</b> |
| 26:01 | 07:01 | 18:01  | 01:01 | 05:01 | 0.01 | <b>1036</b> |
| 26:01 | 07:02 | 07:02  | 01:01 | 05:01 | 0.01 | <b>1036</b> |
| 26:01 | 07:02 | 07:06  | 12:02 | 03:01 | 0.01 | <b>1036</b> |
| 26:01 | 07:02 | 08:01  | 03:01 | 02:01 | 0.26 | <b>35</b>   |
| 26:01 | 07:02 | 08:01  | 09:01 | 03:03 | 0.01 | <b>1036</b> |
| 26:01 | 07:02 | 08:01  | 15:01 | 06:02 | 0.01 | <b>1036</b> |
| 26:01 | 07:02 | 13:01  | 12:02 | 03:01 | 0.01 | <b>1036</b> |
| 26:01 | 07:02 | 15:01  | 04:03 | 03:02 | 0.01 | <b>1036</b> |
| 26:01 | 07:02 | 38:02  | 15:01 | 05:02 | 0.01 | <b>1036</b> |
| 26:01 | 07:02 | 38:02  | 15:01 | 06:01 | 0.01 | <b>1036</b> |
| 26:01 | 07:02 | 39:01  | 04:05 | 04:01 | 0.01 | <b>1036</b> |
| 26:01 | 07:02 | 39:01  | 07:01 | 02:02 | 0.01 | <b>1036</b> |
| 26:01 | 07:02 | 39:01  | 08:03 | 06:01 | 0.09 | <b>130</b>  |
| 26:01 | 07:02 | 39:01  | 11:01 | 03:01 | 0.01 | <b>1036</b> |
| 26:01 | 07:02 | 39:01  | 14:05 | 05:03 | 0.01 | <b>1036</b> |
| 26:01 | 07:02 | 40:01  | 08:03 | 06:01 | 0.05 | <b>286</b>  |
| 26:01 | 07:02 | 40:01  | 09:01 | 03:03 | 0.01 | <b>1036</b> |
| 26:01 | 07:02 | 40:01  | 11:01 | 03:01 | 0.01 | <b>1036</b> |
| 26:01 | 07:02 | 40:01  | 14:05 | 05:03 | 0.01 | <b>1036</b> |
| 26:01 | 07:02 | 40:01  | 14:54 | 05:02 | 0.01 | <b>1036</b> |
| 26:01 | 07:02 | 40:01  | 15:01 | 06:02 | 0.01 | <b>1036</b> |
| 26:01 | 07:02 | 52:01  | 04:05 | 03:02 | 0.08 | <b>151</b>  |
| 26:01 | 07:02 | 56:01  | 09:01 | 03:03 | 0.01 | <b>1036</b> |
| 26:01 | 07:02 | 56:01  | 12:02 | 03:01 | 0.01 | <b>1036</b> |
| 26:01 | 07:02 | 56:01  | 14:54 | 05:03 | 0.01 | <b>1036</b> |
| 26:01 | 07:02 | 67:01  | 12:01 | 03:01 | 0.01 | <b>1036</b> |
| 26:01 | 07:04 | 15:18  | 07:01 | 02:02 | 0.01 | <b>1036</b> |
| 26:01 | 07:04 | 15:18  | 14:05 | 05:03 | 0.02 | <b>572</b>  |
| 26:01 | 08:01 | 15:01  | 08:03 | 06:01 | 0.01 | <b>1036</b> |
| 26:01 | 08:01 | 15:02  | 12:02 | 03:01 | 0.03 | <b>409</b>  |
| 26:01 | 08:01 | 15:18  | 04:04 | 03:02 | 0.01 | <b>1036</b> |
| 26:01 | 08:01 | 27:04  | 11:01 | 03:01 | 0.01 | <b>1036</b> |
| 26:01 | 08:01 | 40:06  | 09:01 | 03:03 | 0.02 | <b>572</b>  |
| 26:01 | 08:01 | 40:06  | 11:01 | 03:01 | 0.01 | <b>1036</b> |
| 26:01 | 08:01 | 40:06  | 12:01 | 03:01 | 0.03 | <b>409</b>  |
| 26:01 | 08:03 | 48:01  | 15:01 | 03:01 | 0.01 | <b>1036</b> |

|       |           |       |           |       |      |      |
|-------|-----------|-------|-----------|-------|------|------|
| 26:01 | 08:22     | 48:01 | 15:01     | 06:02 | 0.01 | 1036 |
| 26:01 | 12:02     | 13:01 | 15:01     | 06:10 | 0.01 | 1036 |
| 26:01 | 12:02     | 27:04 | 04:06     | 03:02 | 0.01 | 1036 |
| 26:01 | 12:02     | 27:04 | 12:01     | 03:01 | 0.01 | 1036 |
| 26:01 | 12:02     | 27:04 | 12:02     | 03:01 | 0.01 | 1036 |
| 26:01 | 12:02     | 52:01 | 15:02     | 06:01 | 0.01 | 1036 |
| 26:01 | 12:03     | 18:01 | 09:01     | 03:03 | 0.01 | 1036 |
| 26:01 | 12:03     | 38:01 | 01:01     | 05:01 | 0.02 | 572  |
| 26:01 | 12:03     | 38:01 | 03:01     | 02:01 | 0.03 | 409  |
| 26:01 | 12:03     | 38:01 | 04:02     | 03:02 | 0.02 | 572  |
| 26:01 | 12:03     | 38:01 | 04:04     | 03:02 | 0.01 | 1036 |
| 26:01 | 12:03     | 38:01 | 13:01     | 06:03 | 0.02 | 572  |
| 26:01 | 12:03     | 38:01 | 13:02     | 06:04 | 0.02 | 572  |
| 26:01 | 12:03     | 39:06 | 13:02     | 06:09 | 0.01 | 1036 |
| 26:01 | 14:02     | 51:01 | 04:04     | 03:02 | 0.01 | 1036 |
| 26:01 | 14:02     | 51:01 | 04:05     | 04:01 | 0.01 | 1036 |
| 26:01 | 14:02     | 51:01 | 09:01     | 03:02 | 0.01 | 1036 |
| 26:01 | 14:02     | 51:01 | 09:01     | 03:03 | 0.02 | 572  |
| 26:01 | 14:02     | 51:01 | 14:03     | 03:01 | 0.01 | 1036 |
| 26:01 | 14:02     | 51:01 | 15:01     | 06:02 | 0.01 | 1036 |
| 26:01 | 14:02     | 51:01 | 12:01:01G | 03:02 | 0.01 | 1036 |
| 26:01 | 15:02     | 15:27 | 04:06     | 03:02 | 0.01 | 1036 |
| 26:01 | 15:02     | 27:04 | 04:05     | 04:01 | 0.01 | 1036 |
| 26:01 | 15:02     | 40:01 | 09:01     | 03:03 | 0.01 | 1036 |
| 26:01 | 15:02     | 40:01 | 13:01     | 06:03 | 0.01 | 1036 |
| 26:01 | 15:02     | 40:02 | 08:03     | 06:01 | 0.01 | 1036 |
| 26:01 | 15:02     | 40:02 | 11:01     | 03:01 | 0.01 | 1036 |
| 26:01 | 15:02     | 40:02 | 15:01     | 06:02 | 0.01 | 1036 |
| 26:01 | 15:02     | 51:01 | 08:02     | 03:02 | 0.01 | 1036 |
| 26:01 | 15:02     | 51:01 | 08:03     | 06:01 | 0.01 | 1036 |
| 26:01 | 15:02     | 51:01 | 11:01     | 03:01 | 0.01 | 1036 |
| 26:01 | 15:02     | 51:01 | 14:03     | 03:01 | 0.01 | 1036 |
| 26:01 | 15:02     | 51:02 | 04:05     | 04:01 | 0.01 | 1036 |
| 26:01 | 15:02     | 51:02 | 08:02     | 04:02 | 0.01 | 1036 |
| 26:01 | 15:02     | 51:02 | 08:03     | 06:01 | 0.01 | 1036 |
| 26:01 | 15:02     | 51:02 | 12:02     | 03:01 | 0.01 | 1036 |
| 26:01 | 15:02     | 51:02 | 15:01     | 06:02 | 0.01 | 1036 |
| 26:01 | 15:04     | 51:01 | 13:02     | 06:04 | 0.01 | 1036 |
| 26:01 | 15:05     | 07:05 | 04:07     | 03:01 | 0.01 | 1036 |
| 26:01 | 15:09     | 27:04 | 14:54     | 05:03 | 0.01 | 1036 |
| 26:01 | 16:02     | 51:01 | 01:01     | 05:01 | 0.01 | 1036 |
| 26:01 | 16:02     | 51:01 | 03:01     | 02:01 | 0.01 | 1036 |
| 26:01 | 16:02     | 51:01 | 12:01     | 03:01 | 0.01 | 1036 |
| 26:01 | 04:01:01G | 35:01 | 14:05     | 05:03 | 0.01 | 1036 |
| 26:01 | 04:01:01G | 48:01 | 12:01:01G | 03:01 | 0.01 | 1036 |
| 26:01 | 07:01:01G | 18:01 | 14:04     | 05:03 | 0.01 | 1036 |
| 26:01 | 08:01:01G | 15:03 | 11:01     | 03:01 | 0.01 | 1036 |
| 26:02 | 08:01     | 40:06 | 09:01     | 03:03 | 0.01 | 1036 |
| 26:03 | 03:03     | 15:01 | 15:01     | 06:02 | 0.01 | 1036 |
| 26:03 | 03:04     | 40:01 | 04:05     | 04:01 | 0.01 | 1036 |
| 26:03 | 08:01     | 15:18 | 09:01     | 03:03 | 0.01 | 1036 |
| 26:46 | 07:02     | 40:01 | 12:02     | 03:01 | 0.01 | 1036 |
| 29:01 | 01:02     | 46:01 | 09:01     | 03:03 | 0.01 | 1036 |
| 29:01 | 03:03     | 40:02 | 15:01     | 06:02 | 0.01 | 1036 |
| 29:01 | 03:04     | 13:01 | 12:02     | 03:01 | 0.02 | 572  |
| 29:01 | 03:04     | 39:01 | 15:01     | 06:02 | 0.01 | 1036 |
| 29:01 | 03:04     | 54:01 | 04:05     | 04:01 | 0.01 | 1036 |
| 29:01 | 04:01     | 35:03 | 11:04     | 03:01 | 0.01 | 1036 |
| 29:01 | 04:01     | 35:03 | 13:02     | 06:04 | 0.05 | 286  |
| 29:01 | 05:01     | 44:02 | 12:01     | 03:01 | 0.01 | 1036 |
| 29:01 | 07:02     | 38:02 | 04:06     | 03:02 | 0.01 | 1036 |
| 29:01 | 07:02     | 52:01 | 14:04     | 05:03 | 0.01 | 1036 |
| 29:01 | 08:01     | 15:02 | 15:01     | 06:01 | 0.01 | 1036 |

|       |           |       |           |       |      |      |
|-------|-----------|-------|-----------|-------|------|------|
| 29:01 | 15:02     | 27:07 | 11:01     | 03:01 | 0.01 | 1036 |
| 29:01 | 15:05     | 07:05 | 01:01     | 05:01 | 0.01 | 1036 |
| 29:01 | 15:05     | 07:05 | 03:01     | 02:01 | 0.02 | 572  |
| 29:01 | 15:05     | 07:05 | 04:02     | 03:02 | 0.01 | 1036 |
| 29:01 | 15:05     | 07:05 | 04:07     | 03:01 | 0.03 | 409  |
| 29:01 | 15:05     | 07:05 | 07:01     | 02:02 | 0.03 | 409  |
| 29:01 | 15:05     | 07:05 | 08:03     | 03:01 | 0.12 | 97   |
| 29:01 | 15:05     | 07:05 | 09:01     | 03:03 | 0.02 | 572  |
| 29:01 | 15:05     | 07:05 | 10:01     | 05:01 | 0.15 | 64   |
| 29:01 | 15:05     | 07:05 | 11:01     | 03:01 | 0.01 | 1036 |
| 29:01 | 15:05     | 07:05 | 11:04     | 03:01 | 0.01 | 1036 |
| 29:01 | 15:05     | 07:05 | 13:02     | 06:04 | 0.02 | 572  |
| 29:01 | 15:05     | 07:05 | 15:01     | 06:02 | 0.02 | 572  |
| 29:01 | 15:05     | 07:05 | 12:01:01G | 03:01 | 0.01 | 1036 |
| 29:02 | 06:02     | 45:01 | 04:05     | 04:01 | 0.01 | 1036 |
| 29:02 | 06:02     | 45:01 | 08:04     | 03:01 | 0.01 | 1036 |
| 29:02 | 06:02     | 45:01 | 11:01     | 03:01 | 0.01 | 1036 |
| 29:02 | 06:02     | 45:01 | 15:01     | 06:02 | 0.16 | 59   |
| 29:02 | 12:02     | 45:01 | 15:01     | 06:02 | 0.01 | 1036 |
| 29:02 | 07:01:01G | 58:01 | 13:02     | 06:04 | 0.01 | 1036 |
| 30:01 | 01:02     | 15:01 | 08:03     | 06:01 | 0.01 | 1036 |
| 30:01 | 01:02     | 15:01 | 12:01     | 03:01 | 0.01 | 1036 |
| 30:01 | 01:02     | 46:01 | 09:01     | 03:03 | 0.01 | 1036 |
| 30:01 | 01:02     | 46:01 | 11:01     | 03:01 | 0.01 | 1036 |
| 30:01 | 01:02     | 54:01 | 08:03     | 06:01 | 0.01 | 1036 |
| 30:01 | 01:02     | 55:07 | 04:05     | 04:01 | 0.01 | 1036 |
| 30:01 | 01:02     | 59:01 | 04:05     | 04:01 | 0.01 | 1036 |
| 30:01 | 01:06     | 55:02 | 09:01     | 03:03 | 0.01 | 1036 |
| 30:01 | 02:02     | 27:05 | 04:03     | 03:02 | 0.01 | 1036 |
| 30:01 | 02:02     | 27:05 | 10:01     | 05:01 | 0.01 | 1036 |
| 30:01 | 03:02     | 13:02 | 07:01     | 02:02 | 0.01 | 1036 |
| 30:01 | 03:02     | 58:01 | 03:01     | 02:01 | 0.01 | 1036 |
| 30:01 | 03:02     | 58:01 | 13:02     | 06:09 | 0.05 | 286  |
| 30:01 | 03:03     | 15:01 | 15:01     | 06:02 | 0.01 | 1036 |
| 30:01 | 03:03     | 15:11 | 09:01     | 03:03 | 0.01 | 1036 |
| 30:01 | 03:03     | 15:11 | 11:01     | 03:01 | 0.01 | 1036 |
| 30:01 | 03:03     | 35:01 | 15:01     | 06:02 | 0.02 | 572  |
| 30:01 | 03:03     | 40:02 | 15:01     | 06:02 | 0.01 | 1036 |
| 30:01 | 03:03     | 52:01 | 04:05     | 04:01 | 0.01 | 1036 |
| 30:01 | 03:04     | 13:01 | 12:02     | 03:01 | 0.02 | 572  |
| 30:01 | 03:04     | 35:01 | 15:01     | 06:02 | 0.01 | 1036 |
| 30:01 | 03:04     | 40:01 | 09:01     | 03:03 | 0.02 | 572  |
| 30:01 | 03:04     | 40:01 | 15:01     | 06:02 | 0.01 | 1036 |
| 30:01 | 04:01     | 15:01 | 15:01     | 06:02 | 0.01 | 1036 |
| 30:01 | 04:01     | 35:03 | 07:01     | 02:02 | 0.01 | 1036 |
| 30:01 | 04:01     | 35:08 | 07:01     | 03:03 | 0.01 | 1036 |
| 30:01 | 04:01     | 40:01 | 14:05     | 05:03 | 0.01 | 1036 |
| 30:01 | 06:02     | 13:02 | 01:01     | 05:01 | 0.03 | 409  |
| 30:01 | 06:02     | 13:02 | 03:01     | 02:01 | 0.06 | 218  |
| 30:01 | 06:02     | 13:02 | 04:01     | 03:01 | 0.01 | 1036 |
| 30:01 | 06:02     | 13:02 | 04:03     | 03:02 | 0.02 | 572  |
| 30:01 | 06:02     | 13:02 | 04:05     | 04:01 | 0.07 | 177  |
| 30:01 | 06:02     | 13:02 | 07:01     | 02:02 | 4.98 | 1    |
| 30:01 | 06:02     | 13:02 | 07:01     | 03:01 | 0.01 | 1036 |
| 30:01 | 06:02     | 13:02 | 07:01     | 03:03 | 0.02 | 572  |
| 30:01 | 06:02     | 13:02 | 08:02     | 04:02 | 0.01 | 1036 |
| 30:01 | 06:02     | 13:02 | 08:03     | 06:01 | 0.05 | 286  |
| 30:01 | 06:02     | 13:02 | 09:01     | 03:03 | 0.09 | 130  |
| 30:01 | 06:02     | 13:02 | 09:01     | 06:02 | 0.01 | 1036 |
| 30:01 | 06:02     | 13:02 | 10:01     | 05:01 | 0.02 | 572  |
| 30:01 | 06:02     | 13:02 | 11:01     | 03:01 | 0.09 | 130  |
| 30:01 | 06:02     | 13:02 | 11:04     | 03:01 | 0.01 | 1036 |
| 30:01 | 06:02     | 13:02 | 12:01     | 03:01 | 0.02 | 572  |

|       |              |       |           |       |      |      |
|-------|--------------|-------|-----------|-------|------|------|
| 30:01 | 06:02        | 13:02 | 12:02     | 03:01 | 0.09 | 130  |
| 30:01 | 06:02        | 13:02 | 13:01     | 06:03 | 0.09 | 130  |
| 30:01 | 06:02        | 13:02 | 13:02     | 06:04 | 0.03 | 409  |
| 30:01 | 06:02        | 13:02 | 14:04     | 05:03 | 0.01 | 1036 |
| 30:01 | 06:02        | 13:02 | 14:05     | 05:03 | 0.01 | 1036 |
| 30:01 | 06:02        | 13:02 | 14:54     | 05:02 | 0.01 | 1036 |
| 30:01 | 06:02        | 13:02 | 15:01     | 06:01 | 0.02 | 572  |
| 30:01 | 06:02        | 13:02 | 15:01     | 06:02 | 0.14 | 76   |
| 30:01 | 06:02        | 13:02 | 15:02     | 06:01 | 0.03 | 409  |
| 30:01 | 06:02        | 13:02 | 16:01     | 05:02 | 0.01 | 1036 |
| 30:01 | 06:02        | 13:02 | 16:02     | 05:02 | 0.02 | 572  |
| 30:01 | 06:02        | 35:01 | 09:01     | 03:03 | 0.01 | 1036 |
| 30:01 | 06:02        | 37:01 | 10:01     | 05:01 | 0.03 | 409  |
| 30:01 | 06:02        | 51:02 | 04:04     | 03:02 | 0.01 | 1036 |
| 30:01 | 06:02        | 57:01 | 07:01     | 03:03 | 0.03 | 409  |
| 30:01 | 07:02        | 07:02 | 01:01     | 05:01 | 0.02 | 572  |
| 30:01 | 07:02        | 07:02 | 11:01     | 03:01 | 0.01 | 1036 |
| 30:01 | 07:02        | 07:02 | 15:01     | 06:02 | 0.01 | 1036 |
| 30:01 | 07:02        | 08:01 | 03:01     | 02:01 | 0.01 | 1036 |
| 30:01 | 07:02        | 39:01 | 12:01     | 03:01 | 0.01 | 1036 |
| 30:01 | 07:02        | 40:01 | 09:01     | 03:03 | 0.05 | 286  |
| 30:01 | 08:01        | 15:02 | 15:01     | 06:01 | 0.01 | 1036 |
| 30:01 | 08:01        | 40:06 | 09:01     | 03:03 | 0.01 | 1036 |
| 30:01 | 08:01        | 51:01 | 12:01     | 03:01 | 0.01 | 1036 |
| 30:01 | 12:02        | 27:04 | 12:02     | 03:01 | 0.02 | 572  |
| 30:01 | 12:03        | 35:03 | 07:01     | 03:03 | 0.01 | 1036 |
| 30:01 | 12:03        | 38:01 | 04:04     | 03:02 | 0.01 | 1036 |
| 30:01 | 14:02        | 51:01 | 03:01     | 02:01 | 0.01 | 1036 |
| 30:01 | 14:02        | 51:01 | 07:01     | 02:02 | 0.01 | 1036 |
| 30:01 | 14:02        | 51:01 | 12:01     | 03:01 | 0.01 | 1036 |
| 30:01 | 14:03        | 44:03 | 13:02     | 06:04 | 0.02 | 572  |
| 30:01 | 14:03        | 46:01 | 08:03     | 06:01 | 0.01 | 1036 |
| 30:01 | 15:02        | 27:04 | 04:05     | 04:01 | 0.01 | 1036 |
| 30:01 | 15:02        | 27:07 | 13:02     | 06:04 | 0.01 | 1036 |
| 30:01 | 15:02        | 40:01 | 04:05     | 04:01 | 0.01 | 1036 |
| 30:01 | 15:02        | 40:01 | 12:01:01G | 03:01 | 0.01 | 1036 |
| 30:01 | 15:05        | 07:05 | 10:01     | 05:01 | 0.01 | 1036 |
| 30:01 | 16:02        | 51:01 | 13:01     | 06:03 | 0.01 | 1036 |
| 30:01 | 17:01        | 42:01 | 13:02     | 06:04 | 0.01 | 1036 |
| 30:01 | 17:01        | 42:02 | 04:05     | 04:01 | 0.01 | 1036 |
| 30:01 | 08:01:01G(1) | 15:02 | 12:02     | 03:01 | 0.02 | 572  |
|       | 08:01(1)     |       |           |       |      |      |
| 30:02 | 04:01        | 53:01 | 13:02     | 06:09 | 0.01 | 1036 |
| 30:04 | 07:01        | 49:01 | 13:02     | 06:04 | 0.01 | 1036 |
| 30:04 | 08:02        | 14:01 | 07:01     | 03:03 | 0.01 | 1036 |
| 30:04 | 08:02        | 14:01 | 15:01     | 06:02 | 0.01 | 1036 |
| 30:18 | 06:02        | 13:02 | 07:01     | 02:02 | 0.01 | 1036 |
| 31:01 | 01:02        | 13:02 | 07:01     | 02:02 | 0.01 | 1036 |
| 31:01 | 01:02        | 15:01 | 04:05     | 04:01 | 0.01 | 1036 |
| 31:01 | 01:02        | 15:01 | 04:06     | 03:02 | 0.01 | 1036 |
| 31:01 | 01:02        | 15:01 | 09:01     | 03:03 | 0.02 | 572  |
| 31:01 | 01:02        | 27:05 | 04:07     | 03:01 | 0.01 | 1036 |
| 31:01 | 01:02        | 46:01 | 04:05     | 04:01 | 0.01 | 1036 |
| 31:01 | 01:02        | 46:01 | 08:03     | 06:01 | 0.05 | 286  |
| 31:01 | 01:02        | 46:01 | 09:01     | 03:03 | 0.02 | 572  |
| 31:01 | 01:02        | 46:01 | 11:01     | 03:01 | 0.01 | 1036 |
| 31:01 | 01:02        | 46:01 | 15:01     | 06:02 | 0.01 | 1036 |
| 31:01 | 01:02        | 54:01 | 04:03     | 03:02 | 0.01 | 1036 |
| 31:01 | 01:02        | 54:01 | 04:05     | 04:01 | 0.06 | 218  |
| 31:01 | 01:02        | 54:01 | 08:03     | 06:01 | 0.01 | 1036 |
| 31:01 | 01:02        | 54:01 | 09:01     | 03:03 | 0.02 | 572  |
| 31:01 | 01:02        | 54:01 | 12:01     | 03:01 | 0.01 | 1036 |
| 31:01 | 01:02        | 54:01 | 14:05     | 05:03 | 0.02 | 572  |

|       |       |       |                          |       |      |      |
|-------|-------|-------|--------------------------|-------|------|------|
| 31:01 | 01:02 | 55:02 | 09:01                    | 03:03 | 0.03 | 409  |
| 31:01 | 01:02 | 55:02 | 12:02                    | 03:01 | 0.01 | 1036 |
| 31:01 | 02:02 | 27:05 | 01:01                    | 05:01 | 0.02 | 572  |
| 31:01 | 02:02 | 27:05 | 04:04                    | 03:02 | 0.01 | 1036 |
| 31:01 | 02:02 | 27:05 | 09:01                    | 03:03 | 0.01 | 1036 |
| 31:01 | 02:02 | 27:05 | 15:01                    | 06:02 | 0.01 | 1036 |
| 31:01 | 03:02 | 58:01 | 03:01                    | 02:01 | 0.02 | 572  |
| 31:01 | 03:02 | 58:01 | 11:01                    | 03:01 | 0.01 | 1036 |
| 31:01 | 03:02 | 58:01 | 13:02                    | 06:09 | 0.01 | 1036 |
| 31:01 | 03:03 | 15:01 | 04:06                    | 03:02 | 0.01 | 1036 |
| 31:01 | 03:03 | 15:01 | 09:01                    | 03:03 | 0.03 | 409  |
| 31:01 | 03:03 | 15:01 | 10:01                    | 05:01 | 0.01 | 1036 |
| 31:01 | 03:03 | 15:01 | 11:01                    | 03:01 | 0.03 | 409  |
| 31:01 | 03:03 | 15:01 | 12:10                    | 03:01 | 0.01 | 1036 |
| 31:01 | 03:03 | 15:01 | 14:05                    | 05:03 | 0.03 | 409  |
| 31:01 | 03:03 | 15:01 | 14:54                    | 05:02 | 0.01 | 1036 |
| 31:01 | 03:03 | 15:01 | 15:01                    | 05:02 | 0.03 | 409  |
| 31:01 | 03:03 | 15:01 | 15:01                    | 05:03 | 0.02 | 572  |
| 31:01 | 03:03 | 15:01 | 15:01                    | 06:02 | 0.15 | 64   |
| 31:01 | 03:03 | 15:11 | 09:01                    | 03:03 | 0.02 | 572  |
| 31:01 | 03:03 | 15:11 | 15:01                    | 06:02 | 0.01 | 1036 |
| 31:01 | 03:03 | 35:01 | 03:01                    | 02:01 | 0.01 | 1036 |
| 31:01 | 03:03 | 35:01 | 09:01                    | 03:03 | 0.01 | 1036 |
| 31:01 | 03:03 | 35:01 | 11:01                    | 03:01 | 0.01 | 1036 |
| 31:01 | 03:03 | 35:01 | 12:02                    | 03:01 | 0.01 | 1036 |
| 31:01 | 03:03 | 35:01 | 15:01                    | 06:02 | 0.03 | 409  |
| 31:01 | 03:03 | 40:01 | 09:01                    | 03:03 | 0.01 | 1036 |
| 31:01 | 03:03 | 40:02 | 04:05                    | 04:01 | 0.01 | 1036 |
| 31:01 | 03:03 | 55:02 | 09:01                    | 03:03 | 0.01 | 1036 |
| 31:01 | 03:03 | 55:02 | 16:02                    | 05:02 | 0.01 | 1036 |
| 31:01 | 03:04 | 13:01 | 12:02                    | 03:01 | 0.03 | 409  |
| 31:01 | 03:04 | 13:01 | 15:01                    | 05:02 | 0.01 | 1036 |
| 31:01 | 03:04 | 13:01 | 15:01                    | 06:02 | 0.01 | 1036 |
| 31:01 | 03:04 | 40:01 | 04:04                    | 03:02 | 0.01 | 1036 |
| 31:01 | 03:04 | 40:01 | 04:05                    | 04:01 | 0.01 | 1036 |
| 31:01 | 03:04 | 40:01 | 09:01                    | 03:03 | 0.01 | 1036 |
| 31:01 | 03:04 | 40:01 | 11:01                    | 03:01 | 0.02 | 572  |
| 31:01 | 03:04 | 40:01 | 15:01                    | 06:02 | 0.01 | 1036 |
| 31:01 | 03:04 | 40:02 | 11:01                    | 03:01 | 0.08 | 151  |
| 31:01 | 03:04 | 40:02 | 14:54                    | 05:03 | 0.01 | 1036 |
| 31:01 | 03:04 | 40:02 | 15:01                    | 06:01 | 0.01 | 1036 |
| 31:01 | 03:04 | 40:02 | 15:01                    | 06:02 | 0.02 | 572  |
| 31:01 | 03:04 | 51:01 | 11:01                    | 03:01 | 0.01 | 1036 |
| 31:01 | 03:04 | 55:02 | 12:02                    | 03:01 | 0.01 | 1036 |
| 31:01 | 04:01 | 15:01 | 12:01                    | 03:01 | 0.01 | 1036 |
| 31:01 | 04:01 | 15:01 | 16:02                    | 05:02 | 0.01 | 1036 |
| 31:01 | 04:01 | 15:27 | 04:05                    | 04:01 | 0.01 | 1036 |
| 31:01 | 04:01 | 15:27 | 09:01                    | 03:01 | 0.01 | 1036 |
| 31:01 | 04:01 | 15:27 | 09:01                    | 03:03 | 0.01 | 1036 |
| 31:01 | 04:01 | 15:27 | 15:01                    | 06:02 | 0.01 | 1036 |
| 31:01 | 04:01 | 35:01 | 04:01                    | 03:01 | 0.01 | 1036 |
| 31:01 | 04:01 | 35:01 | 04:04                    | 04:02 | 0.01 | 1036 |
| 31:01 | 04:01 | 35:01 | 04:05                    | 04:01 | 0.01 | 1036 |
| 31:01 | 04:01 | 35:01 | 08:02                    | 04:02 | 0.02 | 572  |
| 31:01 | 04:01 | 35:01 | 11:01                    | 03:01 | 0.02 | 572  |
| 31:01 | 04:01 | 35:01 | 12:01                    | 05:03 | 0.01 | 1036 |
| 31:01 | 04:01 | 35:01 | 12:02                    | 03:01 | 0.01 | 1036 |
| 31:01 | 04:01 | 35:01 | 14:03                    | 03:01 | 0.01 | 1036 |
| 31:01 | 04:01 | 35:01 | 15:01                    | 06:02 | 0.08 | 151  |
| 31:01 | 04:01 | 35:01 | 12:01:01G(1)<br>12:01(1) | 03:01 | 0.02 | 572  |
| 31:01 | 04:01 | 35:03 | 10:01                    | 05:01 | 0.01 | 1036 |
| 31:01 | 04:01 | 35:05 | 12:02                    | 03:01 | 0.01 | 1036 |

|       |       |       |           |       |      |      |
|-------|-------|-------|-----------|-------|------|------|
| 31:01 | 04:01 | 35:08 | 03:01     | 02:01 | 0.01 | 1036 |
| 31:01 | 04:01 | 40:02 | 15:01     | 06:02 | 0.01 | 1036 |
| 31:01 | 04:01 | 48:01 | 12:02     | 03:01 | 0.01 | 1036 |
| 31:01 | 04:01 | 51:01 | 14:05     | 05:03 | 0.02 | 572  |
| 31:01 | 04:03 | 15:25 | 12:02     | 03:01 | 0.01 | 1036 |
| 31:01 | 06:02 | 13:02 | 07:01     | 02:02 | 0.05 | 286  |
| 31:01 | 07:02 | 07:02 | 01:01     | 05:01 | 0.01 | 1036 |
| 31:01 | 07:02 | 13:01 | 12:02     | 03:01 | 0.01 | 1036 |
| 31:01 | 07:02 | 15:01 | 12:02     | 03:01 | 0.01 | 1036 |
| 31:01 | 07:02 | 15:01 | 14:54     | 05:02 | 0.01 | 1036 |
| 31:01 | 07:02 | 35:01 | 09:01     | 03:03 | 0.01 | 1036 |
| 31:01 | 07:02 | 38:02 | 14:54     | 04:01 | 0.01 | 1036 |
| 31:01 | 07:02 | 38:02 | 15:01     | 06:01 | 0.01 | 1036 |
| 31:01 | 07:02 | 39:01 | 08:03     | 06:01 | 0.05 | 286  |
| 31:01 | 07:02 | 39:01 | 12:02     | 03:01 | 0.01 | 1036 |
| 31:01 | 07:02 | 39:01 | 14:05     | 05:03 | 0.01 | 1036 |
| 31:01 | 07:02 | 39:01 | 14:07     | 05:03 | 0.01 | 1036 |
| 31:01 | 07:02 | 39:01 | 15:01     | 06:02 | 0.01 | 1036 |
| 31:01 | 07:02 | 40:01 | 04:05     | 04:01 | 0.01 | 1036 |
| 31:01 | 07:02 | 40:01 | 07:01     | 02:02 | 0.01 | 1036 |
| 31:01 | 07:02 | 40:01 | 09:01     | 03:03 | 0.01 | 1036 |
| 31:01 | 07:02 | 40:01 | 11:01     | 03:01 | 0.02 | 572  |
| 31:01 | 07:02 | 40:01 | 15:01     | 06:02 | 0.01 | 1036 |
| 31:01 | 07:02 | 40:01 | 16:02     | 05:02 | 0.01 | 1036 |
| 31:01 | 07:02 | 40:01 | 12:01:01G | 03:01 | 0.01 | 1036 |
| 31:01 | 07:02 | 56:01 | 11:01     | 03:01 | 0.01 | 1036 |
| 31:01 | 07:02 | 67:01 | 03:01     | 02:01 | 0.01 | 1036 |
| 31:01 | 07:02 | 67:01 | 07:01     | 02:02 | 0.01 | 1036 |
| 31:01 | 07:04 | 15:11 | 12:01:01G | 03:01 | 0.01 | 1036 |
| 31:01 | 07:04 | 15:18 | 04:05     | 04:01 | 0.01 | 1036 |
| 31:01 | 07:04 | 15:18 | 09:01     | 03:03 | 0.01 | 1036 |
| 31:01 | 07:04 | 44:02 | 11:01     | 03:01 | 0.01 | 1036 |
| 31:01 | 08:01 | 15:02 | 12:02     | 03:01 | 0.05 | 286  |
| 31:01 | 08:01 | 15:18 | 04:03     | 03:02 | 0.01 | 1036 |
| 31:01 | 08:01 | 40:06 | 04:05     | 04:01 | 0.01 | 1036 |
| 31:01 | 08:01 | 40:06 | 09:01     | 03:03 | 0.08 | 151  |
| 31:01 | 08:01 | 40:06 | 11:01     | 03:01 | 0.02 | 572  |
| 31:01 | 08:01 | 40:06 | 12:01     | 03:01 | 0.02 | 572  |
| 31:01 | 08:01 | 48:01 | 12:02     | 03:01 | 0.01 | 1036 |
| 31:01 | 08:03 | 48:01 | 04:05     | 04:01 | 0.02 | 572  |
| 31:01 | 08:03 | 48:01 | 14:05     | 05:03 | 0.01 | 1036 |
| 31:01 | 08:03 | 48:01 | 15:01     | 03:01 | 0.01 | 1036 |
| 31:01 | 08:22 | 48:01 | 09:01     | 03:03 | 0.01 | 1036 |
| 31:01 | 08:22 | 51:01 | 12:02     | 03:01 | 0.01 | 1036 |
| 31:01 | 08:41 | 15:18 | 04:05     | 04:01 | 0.01 | 1036 |
| 31:01 | 12:02 | 52:01 | 07:01     | 03:03 | 0.01 | 1036 |
| 31:01 | 12:03 | 38:01 | 01:01     | 05:01 | 0.01 | 1036 |
| 31:01 | 14:02 | 27:24 | 04:05     | 04:01 | 0.01 | 1036 |
| 31:01 | 14:02 | 27:24 | 09:01     | 03:03 | 0.01 | 1036 |
| 31:01 | 14:02 | 40:06 | 04:05     | 04:01 | 0.01 | 1036 |
| 31:01 | 14:02 | 51:01 | 04:05     | 04:01 | 0.03 | 409  |
| 31:01 | 14:02 | 51:01 | 04:06     | 03:02 | 0.01 | 1036 |
| 31:01 | 14:02 | 51:01 | 07:01     | 02:02 | 0.01 | 1036 |
| 31:01 | 14:02 | 51:01 | 08:03     | 06:01 | 0.01 | 1036 |
| 31:01 | 14:02 | 51:01 | 09:01     | 03:03 | 0.08 | 151  |
| 31:01 | 14:02 | 51:01 | 11:01     | 03:01 | 0.02 | 572  |
| 31:01 | 14:02 | 51:01 | 11:01     | 03:13 | 0.01 | 1036 |
| 31:01 | 14:02 | 51:01 | 12:02     | 03:01 | 0.03 | 409  |
| 31:01 | 14:02 | 51:01 | 14:05     | 05:03 | 0.01 | 1036 |
| 31:01 | 14:02 | 51:01 | 15:01     | 06:02 | 0.05 | 286  |
| 31:01 | 14:02 | 51:01 | 16:02     | 05:02 | 0.05 | 286  |
| 31:01 | 14:02 | 51:07 | 07:01     | 03:03 | 0.01 | 1036 |
| 31:01 | 15:02 | 27:07 | 11:01     | 03:01 | 0.02 | 572  |



|       |                          |        |       |       |      |             |
|-------|--------------------------|--------|-------|-------|------|-------------|
| 31:01 | 15:02                    | 40:01  | 14:05 | 05:03 | 0.02 | <b>572</b>  |
| 31:01 | 15:02                    | 40:01  | 14:54 | 05:02 | 0.01 | <b>1036</b> |
| 31:01 | 15:02                    | 40:02  | 11:01 | 03:01 | 0.01 | <b>1036</b> |
| 31:01 | 15:02                    | 40:06  | 09:01 | 03:03 | 0.01 | <b>1036</b> |
| 31:01 | 15:02                    | 51:01  | 04:03 | 03:02 | 0.01 | <b>1036</b> |
| 31:01 | 15:02                    | 51:01  | 04:05 | 04:01 | 0.01 | <b>1036</b> |
| 31:01 | 15:02                    | 51:01  | 04:06 | 03:02 | 0.01 | <b>1036</b> |
| 31:01 | 15:02                    | 51:01  | 07:01 | 03:03 | 0.01 | <b>1036</b> |
| 31:01 | 15:02                    | 51:01  | 08:03 | 06:01 | 0.01 | <b>1036</b> |
| 31:01 | 15:02                    | 51:01  | 09:01 | 03:03 | 0.01 | <b>1036</b> |
| 31:01 | 15:02                    | 51:01  | 11:01 | 03:01 | 0.01 | <b>1036</b> |
| 31:01 | 15:02                    | 51:01  | 12:01 | 03:01 | 0.01 | <b>1036</b> |
| 31:01 | 15:02                    | 51:01  | 14:03 | 03:01 | 0.01 | <b>1036</b> |
| 31:01 | 15:02                    | 51:01  | 14:05 | 05:03 | 0.01 | <b>1036</b> |
| 31:01 | 15:02                    | 51:01  | 15:01 | 06:02 | 0.02 | <b>572</b>  |
| 31:01 | 15:02                    | 51:02  | 04:05 | 04:01 | 0.01 | <b>1036</b> |
| 31:01 | 15:02                    | 51:02  | 04:06 | 03:02 | 0.01 | <b>1036</b> |
| 31:01 | 15:02                    | 51:02  | 08:02 | 04:02 | 0.05 | <b>286</b>  |
| 31:01 | 15:02                    | 51:02  | 08:03 | 06:01 | 0.02 | <b>572</b>  |
| 31:01 | 15:02                    | 51:02  | 09:01 | 03:03 | 0.03 | <b>409</b>  |
| 31:01 | 15:02                    | 51:02  | 11:01 | 03:01 | 0.01 | <b>1036</b> |
| 31:01 | 15:02                    | 51:02  | 11:01 | 03:13 | 0.01 | <b>1036</b> |
| 31:01 | 15:02                    | 51:02  | 12:01 | 03:01 | 0.01 | <b>1036</b> |
| 31:01 | 15:02                    | 51:02  | 12:02 | 03:01 | 0.02 | <b>572</b>  |
| 31:01 | 15:02                    | 51:02  | 13:07 | 03:01 | 0.01 | <b>1036</b> |
| 31:01 | 15:02                    | 51:02  | 14:05 | 05:03 | 0.01 | <b>1036</b> |
| 31:01 | 15:02                    | 51:02  | 15:01 | 06:02 | 0.03 | <b>409</b>  |
| 31:01 | 15:02                    | 51:136 | 12:02 | 03:01 | 0.01 | <b>1036</b> |
| 31:01 | 15:05                    | 07:05  | 07:01 | 02:02 | 0.01 | <b>1036</b> |
| 31:01 | 04:01:01G                | 15:27  | 04:06 | 03:02 | 0.01 | <b>1036</b> |
| 31:01 | 04:01:01G                | 35:03  | 14:33 | 06:03 | 0.01 | <b>1036</b> |
| 31:01 | 04:01:01G                | 55:02  | 04:05 | 04:01 | 0.01 | <b>1036</b> |
| 31:01 | 04:01:01G(1)<br>04:01(1) | 15:01  | 04:06 | 03:02 | 0.02 | <b>572</b>  |
| 31:01 | 04:01:01G(1)<br>04:01(1) | 35:01  | 09:01 | 03:03 | 0.02 | <b>572</b>  |
| 31:01 | 07:01:01G                | 49:01  | 13:02 | 06:04 | 0.01 | <b>1036</b> |
| 31:01 | 08:01:01G                | 15:01  | 14:05 | 05:03 | 0.01 | <b>1036</b> |
| 31:17 | 04:01                    | 15:01  | 04:06 | 03:02 | 0.01 | <b>1036</b> |
| 31:56 | 15:02                    | 27:07  | 11:01 | 03:01 | 0.01 | <b>1036</b> |
| 32:01 | 01:02                    | 46:01  | 09:01 | 03:03 | 0.01 | <b>1036</b> |
| 32:01 | 01:02                    | 54:01  | 14:05 | 05:03 | 0.02 | <b>572</b>  |
| 32:01 | 01:02                    | 55:01  | 13:01 | 06:03 | 0.01 | <b>1036</b> |
| 32:01 | 03:04                    | 13:01  | 01:01 | 05:01 | 0.01 | <b>1036</b> |
| 32:01 | 03:04                    | 13:01  | 12:02 | 03:01 | 0.01 | <b>1036</b> |
| 32:01 | 03:04                    | 13:01  | 15:01 | 06:01 | 0.01 | <b>1036</b> |
| 32:01 | 03:04                    | 40:01  | 04:05 | 04:01 | 0.01 | <b>1036</b> |
| 32:01 | 03:04                    | 40:02  | 15:01 | 05:03 | 0.01 | <b>1036</b> |
| 32:01 | 03:04                    | 40:03  | 15:01 | 06:02 | 0.01 | <b>1036</b> |
| 32:01 | 04:01                    | 15:01  | 11:01 | 03:01 | 0.01 | <b>1036</b> |
| 32:01 | 04:01                    | 35:03  | 11:01 | 03:01 | 0.01 | <b>1036</b> |
| 32:01 | 04:01                    | 35:03  | 13:01 | 06:03 | 0.01 | <b>1036</b> |
| 32:01 | 04:01                    | 44:03  | 03:01 | 02:01 | 0.02 | <b>572</b>  |
| 32:01 | 04:01                    | 44:03  | 07:01 | 02:02 | 0.12 | <b>97</b>   |
| 32:01 | 05:01                    | 44:02  | 04:05 | 03:02 | 0.01 | <b>1036</b> |
| 32:01 | 05:01                    | 44:02  | 08:03 | 06:01 | 0.01 | <b>1036</b> |
| 32:01 | 05:01                    | 44:02  | 11:04 | 03:01 | 0.01 | <b>1036</b> |
| 32:01 | 05:01                    | 44:02  | 12:01 | 03:01 | 0.01 | <b>1036</b> |
| 32:01 | 05:01                    | 44:02  | 14:05 | 03:02 | 0.01 | <b>1036</b> |
| 32:01 | 05:01                    | 44:02  | 15:01 | 06:02 | 0.01 | <b>1036</b> |
| 32:01 | 07:01                    | 39:24  | 13:02 | 06:09 | 0.01 | <b>1036</b> |
| 32:01 | 07:01                    | 49:01  | 13:02 | 06:04 | 0.01 | <b>1036</b> |
| 32:01 | 07:02                    | 07:02  | 07:01 | 02:02 | 0.02 | <b>572</b>  |

|       |                          |       |       |       |      |      |
|-------|--------------------------|-------|-------|-------|------|------|
| 32:01 | 07:02                    | 67:01 | 14:03 | 03:01 | 0.01 | 1036 |
| 32:01 | 08:22                    | 40:06 | 11:01 | 03:01 | 0.01 | 1036 |
| 32:01 | 12:02                    | 27:04 | 07:01 | 02:02 | 0.01 | 1036 |
| 32:01 | 12:02                    | 52:01 | 01:01 | 05:01 | 0.08 | 151  |
| 32:01 | 12:02                    | 52:01 | 04:06 | 03:02 | 0.01 | 1036 |
| 32:01 | 12:02                    | 52:01 | 12:01 | 03:01 | 0.01 | 1036 |
| 32:01 | 12:02                    | 52:01 | 15:02 | 06:01 | 0.31 | 26   |
| 32:01 | 14:02                    | 51:07 | 01:01 | 05:01 | 0.02 | 572  |
| 32:01 | 04:01:01G                | 35:01 | 01:01 | 05:01 | 0.01 | 1036 |
| 32:01 | 04:01:01G                | 44:03 | 12:02 | 03:01 | 0.01 | 1036 |
| 32:01 | 07:01:01G(1)<br>07:01(1) | 39:24 | 01:01 | 05:01 | 0.02 | 572  |
| 32:01 | 08:01:01G                | 15:02 | 12:02 | 03:01 | 0.01 | 1036 |
| 33:01 | 08:02                    | 14:02 | 01:02 | 05:01 | 0.03 | 409  |
| 33:01 | 08:02                    | 14:02 | 11:01 | 03:01 | 0.01 | 1036 |
| 33:03 | 01:02                    | 15:01 | 09:01 | 03:03 | 0.01 | 1036 |
| 33:03 | 01:02                    | 40:01 | 12:02 | 03:01 | 0.01 | 1036 |
| 33:03 | 01:02                    | 40:01 | 14:54 | 05:02 | 0.01 | 1036 |
| 33:03 | 01:02                    | 40:02 | 09:01 | 03:03 | 0.01 | 1036 |
| 33:03 | 01:02                    | 46:01 | 04:05 | 04:01 | 0.03 | 409  |
| 33:03 | 01:02                    | 46:01 | 08:03 | 06:01 | 0.01 | 1036 |
| 33:03 | 01:02                    | 46:01 | 09:01 | 03:03 | 0.08 | 151  |
| 33:03 | 01:02                    | 46:01 | 11:01 | 03:01 | 0.01 | 1036 |
| 33:03 | 01:02                    | 46:01 | 15:01 | 05:02 | 0.01 | 1036 |
| 33:03 | 01:02                    | 46:01 | 15:01 | 06:02 | 0.01 | 1036 |
| 33:03 | 01:02                    | 54:01 | 04:05 | 04:01 | 0.07 | 177  |
| 33:03 | 01:02                    | 54:01 | 08:02 | 04:02 | 0.01 | 1036 |
| 33:03 | 01:02                    | 54:01 | 09:01 | 03:03 | 0.01 | 1036 |
| 33:03 | 01:02                    | 54:01 | 14:54 | 05:03 | 0.01 | 1036 |
| 33:03 | 01:02                    | 55:02 | 04:05 | 04:01 | 0.01 | 1036 |
| 33:03 | 01:02                    | 55:02 | 08:03 | 06:01 | 0.01 | 1036 |
| 33:03 | 01:02                    | 55:02 | 12:02 | 03:01 | 0.01 | 1036 |
| 33:03 | 01:02                    | 55:02 | 14:54 | 05:03 | 0.01 | 1036 |
| 33:03 | 01:02                    | 55:02 | 15:01 | 06:02 | 0.01 | 1036 |
| 33:03 | 01:02                    | 58:01 | 03:01 | 02:01 | 0.01 | 1036 |
| 33:03 | 01:02                    | 59:01 | 04:05 | 04:01 | 0.01 | 1036 |
| 33:03 | 03:02                    | 13:01 | 15:01 | 06:01 | 0.01 | 1036 |
| 33:03 | 03:02                    | 13:02 | 07:01 | 02:02 | 0.01 | 1036 |
| 33:03 | 03:02                    | 46:01 | 09:01 | 03:03 | 0.01 | 1036 |
| 33:03 | 03:02                    | 51:01 | 13:01 | 06:03 | 0.06 | 218  |
| 33:03 | 03:02                    | 54:01 | 04:05 | 04:01 | 0.01 | 1036 |
| 33:03 | 03:02                    | 58:01 | 01:01 | 05:01 | 0.10 | 115  |
| 33:03 | 03:02                    | 58:01 | 03:01 | 02:01 | 2.83 | 3    |
| 33:03 | 03:02                    | 58:01 | 04:01 | 03:01 | 0.01 | 1036 |
| 33:03 | 03:02                    | 58:01 | 04:02 | 03:02 | 0.01 | 1036 |
| 33:03 | 03:02                    | 58:01 | 04:04 | 03:02 | 0.01 | 1036 |
| 33:03 | 03:02                    | 58:01 | 04:05 | 04:01 | 0.07 | 177  |
| 33:03 | 03:02                    | 58:01 | 04:06 | 03:02 | 0.05 | 286  |
| 33:03 | 03:02                    | 58:01 | 04:07 | 03:02 | 0.01 | 1036 |
| 33:03 | 03:02                    | 58:01 | 07:01 | 02:02 | 0.10 | 115  |
| 33:03 | 03:02                    | 58:01 | 07:01 | 03:03 | 0.01 | 1036 |
| 33:03 | 03:02                    | 58:01 | 08:03 | 05:03 | 0.01 | 1036 |
| 33:03 | 03:02                    | 58:01 | 08:03 | 06:01 | 0.06 | 218  |
| 33:03 | 03:02                    | 58:01 | 09:01 | 03:03 | 0.15 | 64   |
| 33:03 | 03:02                    | 58:01 | 10:01 | 05:01 | 0.02 | 572  |
| 33:03 | 03:02                    | 58:01 | 11:01 | 03:01 | 0.02 | 572  |
| 33:03 | 03:02                    | 58:01 | 11:04 | 03:01 | 0.01 | 1036 |
| 33:03 | 03:02                    | 58:01 | 12:02 | 03:01 | 0.03 | 409  |
| 33:03 | 03:02                    | 58:01 | 13:01 | 06:03 | 0.05 | 286  |
| 33:03 | 03:02                    | 58:01 | 13:02 | 06:02 | 0.01 | 1036 |
| 33:03 | 03:02                    | 58:01 | 13:02 | 06:09 | 1.45 | 4    |
| 33:03 | 03:02                    | 58:01 | 14:04 | 05:03 | 0.01 | 1036 |
| 33:03 | 03:02                    | 58:01 | 14:05 | 03:03 | 0.01 | 1036 |

|       |       |       |           |       |      |      |
|-------|-------|-------|-----------|-------|------|------|
| 33:03 | 03:02 | 58:01 | 14:05     | 05:03 | 0.01 | 1036 |
| 33:03 | 03:02 | 58:01 | 15:01     | 06:01 | 0.01 | 1036 |
| 33:03 | 03:02 | 58:01 | 15:01     | 06:02 | 0.17 | 54   |
| 33:03 | 03:02 | 58:01 | 15:02     | 06:01 | 0.01 | 1036 |
| 33:03 | 03:02 | 58:01 | 16:02     | 05:02 | 0.01 | 1036 |
| 33:03 | 03:02 | 58:01 | 12:01:01G | 03:03 | 0.01 | 1036 |
| 33:03 | 03:03 | 15:01 | 15:01     | 06:02 | 0.01 | 1036 |
| 33:03 | 03:03 | 35:01 | 09:01     | 03:03 | 0.01 | 1036 |
| 33:03 | 03:03 | 35:01 | 12:01     | 03:01 | 0.01 | 1036 |
| 33:03 | 03:03 | 35:01 | 15:01     | 06:02 | 0.01 | 1036 |
| 33:03 | 03:03 | 39:01 | 15:01     | 06:02 | 0.01 | 1036 |
| 33:03 | 03:03 | 40:02 | 15:01     | 06:02 | 0.01 | 1036 |
| 33:03 | 03:03 | 40:06 | 04:06     | 03:02 | 0.01 | 1036 |
| 33:03 | 03:03 | 55:02 | 04:04     | 03:02 | 0.01 | 1036 |
| 33:03 | 03:04 | 13:01 | 04:06     | 03:02 | 0.01 | 1036 |
| 33:03 | 03:04 | 13:01 | 10:01     | 05:01 | 0.01 | 1036 |
| 33:03 | 03:04 | 40:01 | 08:03     | 06:01 | 0.01 | 1036 |
| 33:03 | 03:04 | 40:01 | 09:01     | 03:03 | 0.01 | 1036 |
| 33:03 | 03:04 | 40:01 | 11:01     | 03:01 | 0.02 | 572  |
| 33:03 | 03:04 | 40:01 | 12:02     | 03:01 | 0.01 | 1036 |
| 33:03 | 03:04 | 40:01 | 14:05     | 05:03 | 0.01 | 1036 |
| 33:03 | 03:04 | 40:01 | 16:02     | 05:02 | 0.01 | 1036 |
| 33:03 | 03:04 | 40:02 | 09:01     | 03:03 | 0.02 | 572  |
| 33:03 | 03:04 | 40:02 | 11:01     | 03:01 | 0.01 | 1036 |
| 33:03 | 03:04 | 40:06 | 11:01     | 03:01 | 0.01 | 1036 |
| 33:03 | 03:36 | 58:01 | 13:02     | 06:09 | 0.01 | 1036 |
| 33:03 | 04:01 | 15:01 | 04:06     | 03:02 | 0.03 | 409  |
| 33:03 | 04:01 | 15:01 | 12:01     | 03:01 | 0.01 | 1036 |
| 33:03 | 04:01 | 15:27 | 04:06     | 03:02 | 0.01 | 1036 |
| 33:03 | 04:01 | 35:01 | 15:01     | 06:02 | 0.01 | 1036 |
| 33:03 | 04:01 | 35:03 | 03:01     | 02:01 | 0.01 | 1036 |
| 33:03 | 04:01 | 35:03 | 09:01     | 03:03 | 0.01 | 1036 |
| 33:03 | 04:01 | 35:03 | 13:01     | 06:03 | 0.01 | 1036 |
| 33:03 | 04:01 | 35:03 | 14:54     | 05:03 | 0.01 | 1036 |
| 33:03 | 04:01 | 35:08 | 13:01     | 06:03 | 0.01 | 1036 |
| 33:03 | 04:01 | 35:08 | 15:01     | 06:02 | 0.01 | 1036 |
| 33:03 | 03:85 | 15:11 | 11:01     | 03:01 | 0.01 | 1036 |
| 33:03 | 05:01 | 44:02 | 13:01     | 06:03 | 0.01 | 1036 |
| 33:03 | 06:02 | 13:02 | 04:08     | 03:01 | 0.01 | 1036 |
| 33:03 | 06:02 | 13:02 | 07:01     | 02:02 | 0.05 | 286  |
| 33:03 | 06:02 | 13:02 | 08:03     | 06:01 | 0.02 | 572  |
| 33:03 | 06:02 | 37:01 | 04:05     | 04:01 | 0.01 | 1036 |
| 33:03 | 06:02 | 37:01 | 07:01     | 02:02 | 0.01 | 1036 |
| 33:03 | 06:02 | 37:01 | 10:01     | 05:01 | 0.01 | 1036 |
| 33:03 | 06:02 | 50:01 | 07:01     | 03:03 | 0.01 | 1036 |
| 33:03 | 06:02 | 57:01 | 07:01     | 03:03 | 0.14 | 76   |
| 33:03 | 06:02 | 57:01 | 14:05     | 05:03 | 0.01 | 1036 |
| 33:03 | 06:02 | 57:01 | 15:02     | 06:01 | 0.01 | 1036 |
| 33:03 | 07:02 | 07:02 | 01:01     | 05:01 | 0.01 | 1036 |
| 33:03 | 07:02 | 07:02 | 04:08     | 04:01 | 0.01 | 1036 |
| 33:03 | 07:02 | 07:02 | 13:01     | 06:03 | 0.05 | 286  |
| 33:03 | 07:02 | 07:02 | 15:01     | 06:02 | 0.01 | 1036 |
| 33:03 | 07:02 | 08:01 | 03:01     | 02:01 | 0.09 | 130  |
| 33:03 | 07:02 | 08:01 | 07:01     | 02:02 | 0.01 | 1036 |
| 33:03 | 07:02 | 08:01 | 08:03     | 06:01 | 0.01 | 1036 |
| 33:03 | 07:02 | 08:01 | 09:01     | 03:03 | 0.01 | 1036 |
| 33:03 | 07:02 | 08:01 | 12:02     | 03:01 | 0.01 | 1036 |
| 33:03 | 07:02 | 38:02 | 08:03     | 06:01 | 0.02 | 572  |
| 33:03 | 07:02 | 38:02 | 09:01     | 03:03 | 0.01 | 1036 |
| 33:03 | 07:02 | 38:02 | 12:02     | 03:01 | 0.02 | 572  |
| 33:03 | 07:02 | 38:02 | 15:02     | 05:01 | 0.01 | 1036 |
| 33:03 | 07:02 | 39:01 | 08:03     | 06:01 | 0.02 | 572  |
| 33:03 | 07:02 | 39:01 | 14:54     | 05:02 | 0.01 | 1036 |

|       |           |       |           |       |      |      |
|-------|-----------|-------|-----------|-------|------|------|
| 33:03 | 07:02     | 40:01 | 04:05     | 04:01 | 0.01 | 1036 |
| 33:03 | 07:02     | 40:01 | 04:06     | 03:02 | 0.01 | 1036 |
| 33:03 | 07:02     | 40:01 | 08:03     | 06:01 | 0.05 | 286  |
| 33:03 | 07:02     | 40:01 | 09:01     | 03:03 | 0.03 | 409  |
| 33:03 | 07:02     | 40:01 | 14:05     | 05:03 | 0.01 | 1036 |
| 33:03 | 07:02     | 40:01 | 15:01     | 06:02 | 0.02 | 572  |
| 33:03 | 07:02     | 51:01 | 04:03     | 03:05 | 0.07 | 177  |
| 33:03 | 07:02     | 51:01 | 09:01     | 03:03 | 0.01 | 1036 |
| 33:03 | 07:02     | 51:01 | 13:02     | 06:04 | 0.01 | 1036 |
| 33:03 | 07:02     | 56:01 | 12:10     | 03:01 | 0.01 | 1036 |
| 33:03 | 07:02     | 67:01 | 11:01     | 03:01 | 0.01 | 1036 |
| 33:03 | 07:02     | 67:01 | 15:01     | 06:02 | 0.01 | 1036 |
| 33:03 | 07:04     | 15:18 | 04:01     | 03:02 | 0.01 | 1036 |
| 33:03 | 07:04     | 15:18 | 04:03     | 03:02 | 0.01 | 1036 |
| 33:03 | 07:04     | 40:03 | 14:05     | 05:03 | 0.01 | 1036 |
| 33:03 | 07:06     | 40:06 | 12:01     | 03:01 | 0.01 | 1036 |
| 33:03 | 07:06     | 44:03 | 07:01     | 02:02 | 0.43 | 18   |
| 33:03 | 07:06     | 44:03 | 09:01     | 03:01 | 0.01 | 1036 |
| 33:03 | 07:06     | 44:03 | 09:01     | 03:03 | 0.01 | 1036 |
| 33:03 | 07:06     | 44:03 | 12:01     | 03:02 | 0.01 | 1036 |
| 33:03 | 07:06     | 44:03 | 15:02     | 06:01 | 0.03 | 409  |
| 33:03 | 07:18     | 58:01 | 13:01     | 06:03 | 0.01 | 1036 |
| 33:03 | 08:01     | 15:02 | 04:05     | 04:01 | 0.01 | 1036 |
| 33:03 | 08:01     | 15:18 | 04:04     | 03:02 | 0.01 | 1036 |
| 33:03 | 08:01     | 15:18 | 08:03     | 06:01 | 0.01 | 1036 |
| 33:03 | 08:01     | 40:06 | 08:03     | 06:01 | 0.01 | 1036 |
| 33:03 | 08:01     | 40:06 | 15:01     | 06:02 | 0.01 | 1036 |
| 33:03 | 08:03     | 48:01 | 04:05     | 04:01 | 0.01 | 1036 |
| 33:03 | 12:02     | 15:07 | 15:02     | 05:01 | 0.01 | 1036 |
| 33:03 | 12:02     | 27:04 | 12:02     | 03:01 | 0.01 | 1036 |
| 33:03 | 12:02     | 52:01 | 11:01     | 03:01 | 0.01 | 1036 |
| 33:03 | 12:02     | 52:01 | 14:04     | 05:03 | 0.01 | 1036 |
| 33:03 | 12:02     | 52:01 | 15:02     | 06:01 | 0.02 | 572  |
| 33:03 | 12:03     | 18:01 | 11:04     | 03:01 | 0.05 | 286  |
| 33:03 | 12:03     | 35:03 | 04:08     | 03:04 | 0.01 | 1036 |
| 33:03 | 12:03     | 35:03 | 13:01     | 06:03 | 0.01 | 1036 |
| 33:03 | 12:03     | 35:03 | 14:54     | 05:03 | 0.02 | 572  |
| 33:03 | 14:02     | 40:01 | 11:01     | 03:01 | 0.01 | 1036 |
| 33:03 | 14:02     | 51:01 | 09:01     | 03:03 | 0.01 | 1036 |
| 33:03 | 14:02     | 51:01 | 11:01     | 03:01 | 0.01 | 1036 |
| 33:03 | 14:02     | 51:01 | 12:01     | 03:02 | 0.01 | 1036 |
| 33:03 | 14:02     | 51:01 | 15:01     | 06:02 | 0.01 | 1036 |
| 33:03 | 14:03     | 07:02 | 12:01     | 03:01 | 0.01 | 1036 |
| 33:03 | 14:03     | 40:06 | 04:03     | 03:02 | 0.01 | 1036 |
| 33:03 | 14:03     | 44:03 | 01:01     | 05:01 | 0.01 | 1036 |
| 33:03 | 14:03     | 44:03 | 04:05     | 04:01 | 0.02 | 572  |
| 33:03 | 14:03     | 44:03 | 09:01     | 03:03 | 0.02 | 572  |
| 33:03 | 14:03     | 44:03 | 10:01     | 05:01 | 0.01 | 1036 |
| 33:03 | 14:03     | 44:03 | 13:01     | 06:03 | 0.01 | 1036 |
| 33:03 | 14:03     | 44:03 | 13:02     | 06:04 | 0.94 | 6    |
| 33:03 | 14:03     | 44:03 | 13:02     | 06:07 | 0.02 | 572  |
| 33:03 | 14:03     | 44:03 | 14:03     | 03:01 | 0.01 | 1036 |
| 33:03 | 14:03     | 44:03 | 15:01     | 06:02 | 0.01 | 1036 |
| 33:03 | 14:03     | 44:03 | 15:02     | 06:01 | 0.01 | 1036 |
| 33:03 | 14:03     | 44:03 | 16:02     | 05:02 | 0.01 | 1036 |
| 33:03 | 14:03     | 46:01 | 13:02     | 06:09 | 0.01 | 1036 |
| 33:03 | 15:02     | 40:06 | 04:05     | 04:01 | 0.01 | 1036 |
| 33:03 | 15:02     | 40:06 | 11:01     | 03:01 | 0.01 | 1036 |
| 33:03 | 15:02     | 51:01 | 08:02     | 03:02 | 0.01 | 1036 |
| 33:03 | 16:02     | 51:01 | 01:01     | 05:01 | 0.01 | 1036 |
| 33:03 | 16:02     | 51:01 | 13:01     | 06:03 | 0.02 | 572  |
| 33:03 | 17:01     | 41:01 | 13:02     | 06:04 | 0.01 | 1036 |
| 33:03 | 04:01:01G | 15:27 | 12:01:01G | 03:01 | 0.01 | 1036 |

|         |                          |       |       |       |      |      |
|---------|--------------------------|-------|-------|-------|------|------|
| 33:03   | 04:01:01G                | 35:03 | 14:04 | 05:03 | 0.01 | 1036 |
| 33:03   | 07:01:01G(2)<br>07:06(1) | 44:03 | 03:01 | 02:01 | 0.03 | 409  |
| 33:03   | 08:01:01G(1)<br>08:01(1) | 15:02 | 12:02 | 03:01 | 0.02 | 572  |
| 34:01   | 04:03                    | 15:21 | 04:03 | 03:02 | 0.01 | 1036 |
| 66:01   | 07:01                    | 49:01 | 13:02 | 06:04 | 0.01 | 1036 |
| 66:01   | 07:01                    | 49:01 | 15:01 | 06:02 | 0.01 | 1036 |
| 68:01   | 01:02                    | 27:05 | 04:04 | 03:02 | 0.02 | 572  |
| 68:01   | 01:02                    | 40:03 | 14:05 | 05:03 | 0.01 | 1036 |
| 68:01   | 02:02                    | 27:05 | 04:03 | 03:02 | 0.02 | 572  |
| 68:01   | 02:02                    | 27:05 | 15:01 | 06:02 | 0.01 | 1036 |
| 68:01   | 03:03                    | 15:11 | 09:01 | 03:03 | 0.01 | 1036 |
| 68:01   | 03:04                    | 40:01 | 04:04 | 03:02 | 0.01 | 1036 |
| 68:01   | 04:01                    | 35:03 | 14:54 | 05:03 | 0.01 | 1036 |
| 68:01   | 04:01                    | 35:03 | 15:01 | 06:02 | 0.01 | 1036 |
| 68:01   | 04:01                    | 44:03 | 07:01 | 02:02 | 0.06 | 218  |
| 68:01   | 04:03                    | 15:25 | 15:02 | 05:01 | 0.02 | 572  |
| 68:01   | 05:01                    | 44:02 | 13:01 | 06:03 | 0.01 | 1036 |
| 68:01   | 06:02                    | 13:02 | 07:01 | 02:02 | 0.01 | 1036 |
| 68:01   | 06:02                    | 37:01 | 01:01 | 05:01 | 0.01 | 1036 |
| 68:01   | 06:02                    | 37:01 | 01:14 | 05:01 | 0.01 | 1036 |
| 68:01   | 06:02                    | 37:01 | 10:01 | 05:01 | 0.05 | 286  |
| 68:01   | 06:02                    | 57:01 | 07:01 | 03:03 | 0.02 | 572  |
| 68:01   | 06:02                    | 57:01 | 15:02 | 06:01 | 0.01 | 1036 |
| 68:01   | 07:02                    | 08:01 | 03:01 | 02:01 | 0.02 | 572  |
| 68:01   | 07:02                    | 52:01 | 14:04 | 05:03 | 0.03 | 409  |
| 68:01   | 07:02                    | 56:01 | 04:10 | 04:02 | 0.01 | 1036 |
| 68:01   | 07:04                    | 44:02 | 11:01 | 03:01 | 0.01 | 1036 |
| 68:01   | 07:06                    | 44:03 | 07:13 | 02:02 | 0.01 | 1036 |
| 68:01   | 08:06                    | 48:01 | 09:01 | 03:03 | 0.01 | 1036 |
| 68:01   | 12:02                    | 52:01 | 15:02 | 06:01 | 0.01 | 1036 |
| 68:01   | 12:03                    | 18:01 | 13:01 | 06:03 | 0.02 | 572  |
| 68:01   | 14:02                    | 51:01 | 14:04 | 05:03 | 0.01 | 1036 |
| 68:01   | 15:02                    | 51:01 | 01:01 | 05:01 | 0.01 | 1036 |
| 68:01   | 15:02                    | 51:01 | 07:01 | 02:02 | 0.01 | 1036 |
| 68:01   | 15:02                    | 51:01 | 09:01 | 03:03 | 0.01 | 1036 |
| 68:01   | 15:04                    | 51:01 | 11:01 | 03:01 | 0.01 | 1036 |
| 68:01   | 16:02                    | 51:08 | 13:02 | 06:04 | 0.01 | 1036 |
| 68:01   | 04:01:01G                | 44:03 | 04:06 | 03:02 | 0.01 | 1036 |
| 68:02   | 02:02                    | 27:03 | 03:01 | 02:01 | 0.01 | 1036 |
| 68:02   | 02:02                    | 27:03 | 11:01 | 03:01 | 0.01 | 1036 |
| 69:01   | 12:02                    | 52:01 | 04:05 | 04:01 | 0.13 | 85   |
| 69:01   | 12:02                    | 52:01 | 07:01 | 02:02 | 0.01 | 1036 |
| 69:01   | 12:02                    | 52:01 | 07:01 | 03:03 | 0.10 | 115  |
| 69:01   | 12:02                    | 52:01 | 09:01 | 03:03 | 0.03 | 409  |
| 69:01   | 12:02                    | 52:01 | 09:01 | 04:01 | 0.01 | 1036 |
| 69:01   | 12:02                    | 52:01 | 11:01 | 03:01 | 0.01 | 1036 |
| 69:01   | 12:02                    | 52:01 | 12:01 | 03:01 | 0.01 | 1036 |
| 69:01   | 12:02                    | 52:01 | 12:01 | 03:03 | 0.01 | 1036 |
| 69:01   | 12:02                    | 52:01 | 15:01 | 06:02 | 0.01 | 1036 |
| 69:01   | 04:01:01G                | 15:01 | 04:06 | 03:02 | 0.01 | 1036 |
| 74:02   | 01:02                    | 46:01 | 08:03 | 06:01 | 0.01 | 1036 |
| 74:02   | 03:04                    | 13:01 | 16:02 | 05:02 | 0.01 | 1036 |
| 74:02   | 04:01                    | 15:01 | 04:06 | 03:02 | 0.01 | 1036 |
| 74:02   | 07:02                    | 38:02 | 15:02 | 05:01 | 0.01 | 1036 |
| 74:02   | 08:01                    | 15:02 | 12:02 | 03:01 | 0.01 | 1036 |
| 02:53N  | 01:02                    | 54:01 | 04:05 | 04:01 | 0.01 | 1036 |
| 02:53N  | 04:01                    | 40:01 | 09:01 | 03:03 | 0.01 | 1036 |
| 02:53N  | 07:02                    | 40:02 | 14:54 | 05:03 | 0.01 | 1036 |
| 02:53N  | 08:22                    | 81:02 | 15:01 | 06:02 | 0.01 | 1036 |
| 24:02L  | 12:02                    | 52:01 | 15:02 | 06:01 | 0.01 | 1036 |
| 24:132N | 15:02                    | 51:02 | 14:54 | 05:02 | 0.01 | 1036 |

|       |       |       |       |       |      |             |
|-------|-------|-------|-------|-------|------|-------------|
| 24:68 | 07:02 | 40:01 | 12:02 | 03:01 | 0.01 | <b>1036</b> |
| 24:68 | 07:02 | 40:01 | 15:01 | 05:02 | 0.01 | <b>1036</b> |
| 26:82 | 08:01 | 48:01 | 11:01 | 03:01 | 0.01 | <b>1036</b> |
| 30:72 | 06:02 | 13:02 | 08:03 | 06:01 | 0.01 | <b>1036</b> |

G groups: C\*04:01:01G including C\*04:01 and C\*04:82; C\*07:01:01G including C\*07:01 and C\*07:06;  
C\*08:01:01G including C\*08:01 and C\*08:22; C\*17:01:01G including C\*17:01 and C\*17:03;  
B\*40:40:01G including B\*40:40 and B\*40:229  
DRB1\*12:01:01G including DRB1\*12:01 and DRB1\*12:10

G groups: C\*04:01:01G including C\*04:01 and C\*04:82; C\*07:01:01G including C\*07:01 and C\*07:06;  
C\*08:01:01G including C\*08:01 and C\*08:22; C\*17:01:01G including C\*17:01 and C\*17:03;  
B\*40:40:01G including B\*40:40 and B\*40:229  
DRB1\*12:01:01G including DRB1\*12:01 and DRB1\*12:10

**Supplementary Table 2:** A comparison of the top 20 HLA-A-C-B-DRB1-DQB1 haplotypes with their constituent alleles and linkage disequilibrium test results ( $4n=6808$ )

| HLA-A-C-B-DRB1-DQB1 haplotype and rank |       |       |       |       |                   | Rank of each HLA allele |    |    |      |      | LD test ( $D'$ )   |                    |                    |                    |                   |                   |                    |                    |                    |                    |
|----------------------------------------|-------|-------|-------|-------|-------------------|-------------------------|----|----|------|------|--------------------|--------------------|--------------------|--------------------|-------------------|-------------------|--------------------|--------------------|--------------------|--------------------|
| A*                                     | C*    | B*    | DRB1* | DQB1* | Rank <sup>§</sup> | A                       | C  | B  | DRB1 | DQB1 | A-C                | A-B                | A-DRB1             | A-DQB1             | B-C               | B-DRB1            | B-DQB1             | C-DRB1             | C-DQB1             | DR-DQB1            |
| 30:01                                  | 06:02 | 13:02 | 07:01 | 02:02 | 1                 | 6                       | 3  | 3  | 3    | 4    | 0.88 <sup>†</sup>  | 0.87 <sup>†</sup>  | 0.71 <sup>†</sup>  | 0.71 <sup>†</sup>  | 0.98 <sup>†</sup> | 0.83 <sup>†</sup> | 0.82 <sup>†</sup>  | 0.7 <sup>†</sup>   | 0.73 <sup>†</sup>  | 1.00 <sup>†</sup>  |
| 02:07                                  | 01:02 | 46:01 | 09:01 | 03:03 | 2                 | 5                       | 1  | 1  | 1    | 2    | 0.63 <sup>†</sup>  | 0.67 <sup>†</sup>  | 0.37               | 0.36               | 0.88 <sup>†</sup> | 0.47              | 0.46               | 0.24               | 0.23               | 0.97 <sup>†</sup>  |
| 33:03                                  | 03:02 | 58:01 | 03:01 | 02:01 | 3                 | 4                       | 6  | 4  | 8    | 8    | 0.80 <sup>†</sup>  | 0.81 <sup>†</sup>  | 0.57 <sup>†</sup>  | 0.57 <sup>†</sup>  | 0.99 <sup>†</sup> | 0.67 <sup>†</sup> | 0.68 <sup>†</sup>  | 0.67 <sup>†</sup>  | 0.67 <sup>†</sup>  | 1.00 <sup>†</sup>  |
| 33:03                                  | 03:02 | 58:01 | 13:02 | 06:09 | 4                 | 4                       | 6  | 4  | 9    | 12   | 0.80 <sup>†</sup>  | 0.81 <sup>†</sup>  | 0.60 <sup>†</sup>  | 0.67 <sup>†</sup>  | 0.99 <sup>†</sup> | 0.43              | 0.84 <sup>†</sup>  | 0.42               | 0.83 <sup>†</sup>  | 0.99 <sup>†</sup>  |
| 11:01                                  | 08:01 | 15:02 | 12:02 | 03:01 | 5                 | 1                       | 7  | 10 | 4    | 1    | 0.21               | 0.57 <sup>†</sup>  | 0.21               | 0.09               | 0.73 <sup>†</sup> | 0.60 <sup>†</sup> | 0.60 <sup>†</sup>  | 0.21               | 0.26               | 0.96 <sup>†</sup>  |
| 02:07                                  | 01:02 | 46:01 | 08:03 | 06:01 | 6                 | 5                       | 1  | 1  | 5    | 3    | 0.63 <sup>†</sup>  | 0.67 <sup>†</sup>  | 0.08               | 0.05               | 0.88 <sup>†</sup> | 0.13              | 0.07               | 0.15               | 0.07               | 0.96 <sup>†</sup>  |
| 33:03                                  | 14:03 | 44:03 | 13:02 | 06:04 | 6                 | 4                       | 14 | 14 | 9    | 13   | 0.84 <sup>†</sup>  | 0.68 <sup>†</sup>  | 0.6 <sup>†</sup>   | 0.51 <sup>†</sup>  | 0.95 <sup>†</sup> | 0.47              | 0.62 <sup>†</sup>  | 0.86 <sup>†</sup>  | 0.84 <sup>†</sup>  | 0.99 <sup>†</sup>  |
| 11:01                                  | 04:01 | 15:01 | 04:06 | 03:02 | 8                 | 1                       | 9  | 6  | 10   | 6    | 0.09               | 0.16               | 0.24               | 0.12               | 0.36              | 0.43              | 0.22               | 0.52 <sup>†</sup>  | 0.33               | 1.00 <sup>†</sup>  |
| 02:01                                  | 03:04 | 13:01 | 12:02 | 03:01 | 9                 | 3                       | 4  | 7  | 4    | 1    | 0.08               | 0.10               | 0.02               | 0.07               | 0.90 <sup>†</sup> | 0.33              | 0.28               | 0.12               | 0.16               | 0.96 <sup>†</sup>  |
| 02:01                                  | 03:03 | 15:11 | 09:01 | 03:03 | 9                 | 3                       | 5  | 18 | 1    | 2    | 0.17               | 0.47               | 0.05               | 0.05               | 0.97 <sup>†</sup> | 0.34              | 0.35               | 0.09               | 0.08               | 0.97 <sup>†</sup>  |
| 11:01                                  | 03:04 | 13:01 | 15:01 | 06:01 | 11                | 1                       | 4  | 7  | 2    | 3    | 0.10               | 0.24               | 0.04               | 0.11               | 0.90 <sup>†</sup> | 0.20              | 0.14               | 0.13               | 0.03               | 0.10               |
| 01:01                                  | 06:02 | 57:01 | 07:01 | 03:03 | 12                | 11                      | 3  | 20 | 3    | 2    | 0.54 <sup>†</sup>  | 0.55 <sup>†</sup>  | 0.24               | 0.15               | 0.95 <sup>†</sup> | 0.76 <sup>†</sup> | 0.71 <sup>†</sup>  | 0.7 <sup>†</sup>   | -0.32 <sup>‡</sup> | -0.04 <sup>‡</sup> |
| 24:02                                  | 01:02 | 54:01 | 04:05 | 04:01 | 13                | 2                       | 1  | 8  | 6    | 7    | 0.01               | 0.27               | 0.05               | 0.04               | 0.95 <sup>†</sup> | 0.39              | 0.38               | 0.27               | 0.27               | 0.98 <sup>†</sup>  |
| 11:01                                  | 07:02 | 40:01 | 08:03 | 06:01 | 14                | 1                       | 2  | 2  | 5    | 3    | 0.15               | 0.20               | 0.04               | 0.11               | 0.43              | 0.09              | 0.05               | 0.30               | 0.19               | 0.96 <sup>†</sup>  |
| 24:02                                  | 14:02 | 51:01 | 09:01 | 03:03 | 14                | 2                       | 8  | 5  | 1    | 2    | 0.10               | 0.07               | 0.02               | 0.00               | 0.92 <sup>†</sup> | 0.11              | 0.10               | 0.15               | 0.14               | 0.97 <sup>†</sup>  |
| 11:01                                  | 01:02 | 46:01 | 09:01 | 03:03 | 16                | 1                       | 1  | 1  | 1    | 2    | -0.01 <sup>‡</sup> | -0.41 <sup>‡</sup> | -0.14 <sup>‡</sup> | -0.17 <sup>‡</sup> | 0.88 <sup>†</sup> | 0.47              | 0.46               | 0.24               | 0.23               | 0.97 <sup>†</sup>  |
| 11:01                                  | 07:02 | 40:01 | 09:01 | 03:03 | 17                | 1                       | 2  | 2  | 1    | 2    | 0.15               | 0.20               | -0.14 <sup>‡</sup> | -0.17 <sup>‡</sup> | 0.43              | 0.02              | -0.02 <sup>‡</sup> | -0.30 <sup>‡</sup> | -0.32 <sup>‡</sup> | 0.97 <sup>†</sup>  |
| 33:03                                  | 07:06 | 44:03 | 07:01 | 02:02 | 18                | 4                       | 23 | 14 | 3    | 4    | 0.84 <sup>†</sup>  | 0.68 <sup>†</sup>  | -0.16 <sup>‡</sup> | -0.19 <sup>‡</sup> | 0.98 <sup>†</sup> | 0.25              | 0.28               | 0.77 <sup>†</sup>  | 0.80 <sup>†</sup>  | 1.00 <sup>†</sup>  |
| 01:01                                  | 06:02 | 37:01 | 10:01 | 05:01 | 19                | 11                      | 3  | 27 | 17   | 11   | 0.54 <sup>†</sup>  | 0.64 <sup>†</sup>  | 0.30               | 0.17               | 0.99 <sup>†</sup> | 0.69 <sup>†</sup> | 0.71 <sup>†</sup>  | 0.44               | 0.14               | 1.00 <sup>†</sup>  |
| 11:01                                  | 14:02 | 51:01 | 09:01 | 03:03 | 19                | 1                       | 8  | 5  | 1    | 2    | 0.05               | -0.02 <sup>‡</sup> | -0.14 <sup>‡</sup> | -0.17 <sup>‡</sup> | 0.92 <sup>†</sup> | 0.11              | 0.10               | 0.15               | 0.14               | 0.97 <sup>†</sup>  |
| 24:02                                  | 03:04 | 13:01 | 12:02 | 03:01 | 19                | 2                       | 4  | 7  | 4    | 1    | 0.13               | 0.06               | 0.02               | 0.05               | 0.9 <sup>†</sup>  | 0.33              | 0.28               | 0.12               | 0.16               | 0.96 <sup>†</sup>  |

<sup>†</sup>  $D' > 0.5$ ; <sup>‡</sup>  $D' < 0$ ; <sup>§</sup> The same ranks were assigned to different haplotypes if their HF's were equal.



**Supplementary Table 3:** Pairwise linkage disequilibrium (LD) test for 2-locus haplotypes ( $4n=8608$ )

| 2-locus haplotype |                     | HF (%)   |          | D'   | r <sup>2</sup> | 2-locus haplotype |       | HF (%)   |          | D'   | r <sup>2</sup> |
|-------------------|---------------------|----------|----------|------|----------------|-------------------|-------|----------|----------|------|----------------|
| A*                | B*                  | Observed | Expected |      |                | DRB1*             | DQB1* | Observed | Expected |      |                |
| 01:01             | 37:01               | 0.59     | 0.02     | 0.64 | 0.15           | 01:01             | 05:01 | 1.18     | 0.04     | 0.99 | 0.37           |
| 01:01             | 57:01               | 0.76     | 0.03     | 0.55 | 0.16           | 03:01             | 02:01 | 4.88     | 0.24     | 1.00 | 1.00           |
| 02:03             | 38:02               | 1.27     | 0.07     | 0.52 | 0.22           | 04:03             | 03:02 | 1.23     | 0.08     | 0.93 | 0.17           |
| 02:07             | 46:01 <sup>†</sup>  | 6.08     | 0.87     | 0.67 | 0.38           | 04:04             | 03:02 | 0.98     | 0.06     | 0.99 | 0.14           |
| 24:07             | 35:05               | 0.21     | 0.00     | 0.75 | 0.46           | 04:05             | 04:01 | 5.56     | 0.34     | 0.98 | 0.91           |
| 29:01             | 07:05 <sup>‡</sup>  | 0.43     | 0.00     | 0.84 | 0.53           | 04:06             | 03:02 | 3.06     | 0.19     | 1.00 | 0.46           |
| 29:02             | 45:01               | 0.21     | 0.00     | 0.95 | 0.77           | 04:10             | 04:02 | 0.17     | 0.00     | 0.94 | 0.17           |
| 30:01             | 13:02 <sup>§</sup>  | 6.03     | 0.50     | 0.87 | 0.70           | 07:01             | 02:02 | 8.22     | 0.83     | 1.00 | 0.80           |
| 33:03             | 44:03               | 1.63     | 0.21     | 0.68 | 0.11           | 08:02             | 04:02 | 0.48     | 0.00     | 0.89 | 0.45           |
| 33:03             | 58:01 <sup>  </sup> | 5.33     | 0.60     | 0.81 | 0.44           | 08:03             | 06:01 | 7.11     | 0.76     | 0.96 | 0.64           |
| 69:01             | 52:01 <sup>¶</sup>  | 0.34     | 0.01     | 0.97 | 0.14           | 08:09             | 04:02 | 0.13     | 0.00     | 1.00 | 0.13           |
|                   |                     |          |          |      |                | 09:01             | 03:03 | 16.61    | 3.19     | 0.97 | 0.84           |
| A*                | C*                  | Observed | Expected | D'   | r <sup>2</sup> | 10:01             | 05:01 | 1.28     | 0.04     | 1.00 | 0.40           |
| 02:07             | 01:02 <sup>†</sup>  | 5.99     | 1.47     | 0.63 | 0.18           | 11:01             | 03:01 | 5.38     | 1.15     | 0.93 | 0.21           |
| 29:01             | 15:05 <sup>‡</sup>  | 0.49     | 0.00     | 0.84 | 0.61           | 12:02             | 03:01 | 8.31     | 1.72     | 0.96 | 0.35           |
| 30:01             | 06:02 <sup>§</sup>  | 6.11     | 0.68     | 0.88 | 0.51           | 13:01             | 06:03 | 0.99     | 0.01     | 1.00 | 0.99           |
| 33:03             | 03:02 <sup>  </sup> | 5.40     | 0.61     | 0.80 | 0.45           | 13:02             | 06:04 | 1.73     | 0.07     | 0.99 | 0.43           |
| 69:01             | 12:02 <sup>¶</sup>  | 0.34     | 0.01     | 0.97 | 0.10           | 13:02             | 06:09 | 2.09     | 0.08     | 0.99 | 0.53           |
|                   |                     |          |          |      |                | 14:04             | 05:03 | 0.44     | 0.02     | 0.97 | 0.11           |
| B*                | C*                  | Observed | Expected | D'   | r <sup>2</sup> | 14:05             | 05:03 | 2.06     | 0.08     | 0.96 | 0.51           |
| 07:05             | 15:05 <sup>‡</sup>  | 0.51     | 0.00     | 1.00 | 0.88           | 14:54             | 05:02 | 1.45     | 0.11     | 0.61 | 0.17           |
| 13:01             | 03:04               | 4.21     | 0.45     | 0.90 | 0.36           | 15:01             | 06:02 | 7.42     | 0.82     | 0.97 | 0.64           |
| 13:02             | 06:02 <sup>§</sup>  | 7.19     | 0.73     | 0.98 | 0.68           | 16:02             | 05:02 | 2.09     | 0.10     | 0.99 | 0.42           |
| 15:02             | 08:01               | 2.36     | 0.20     | 0.73 | 0.26           |                   |       |          |          |      |                |
| 15:11             | 03:03               | 1.91     | 0.15     | 0.97 | 0.23           | A*                | DRB1* | Observed | Expected | D'   | r <sup>2</sup> |
| 15:18             | 07:04               | 0.52     | 0.01     | 0.63 | 0.26           | 30:01             | 07:01 | 5.11     | 0.69     | 0.71 | 0.34           |
| 15:25             | 04:03               | 0.28     | 0.00     | 0.80 | 0.36           | 33:03             | 03:01 | 2.99     | 0.45     | 0.57 | 0.16           |
| 15:27             | 04:01               | 0.87     | 0.05     | 0.81 | 0.15           | 33:03             | 13:02 | 2.47     | 0.36     | 0.60 | 0.14           |
| 27:04             | 12:02               | 1.15     | 0.04     | 0.85 | 0.30           |                   |       |          |          |      |                |
| 27:05             | 02:02               | 0.76     | 0.01     | 0.93 | 0.71           | B*                | DRB1* | Observed | Expected | D'   | r <sup>2</sup> |
| 35:01             | 03:03               | 1.72     | 0.21     | 0.60 | 0.12           | 08:01             | 03:01 | 0.63     | 0.04     | 0.85 | 0.10           |
| 35:03             | 12:03               | 0.38     | 0.01     | 0.51 | 0.13           | 13:02             | 07:01 | 6.19     | 0.74     | 0.83 | 0.48           |
| 38:01             | 12:03               | 0.27     | 0.00     | 1.00 | 0.19           | 15:02             | 12:02 | 2.00     | 0.27     | 0.60 | 0.12           |
| 38:02             | 07:02               | 2.35     | 0.33     | 0.99 | 0.15           | 37:01             | 10:01 | 0.63     | 0.01     | 0.69 | 0.33           |
| 40:06             | 08:01               | 1.91     | 0.20     | 0.57 | 0.16           | 58:01             | 03:01 | 3.40     | 0.32     | 0.67 | 0.34           |
| 44:02             | 05:01               | 0.45     | 0.00     | 0.95 | 0.84           |                   |       |          |          |      |                |
| 44:03             | 07:06               | 0.55     | 0.01     | 0.98 | 0.23           | C*                | DRB1* | Observed | Expected | D'   | r <sup>2</sup> |
| 44:03             | 14:03               | 1.25     | 0.03     | 0.95 | 0.52           | 03:02             | 03:01 | 3.38     | 0.32     | 0.67 | 0.33           |
| 46:01             | 01:02 <sup>†</sup>  | 9.05     | 1.72     | 0.88 | 0.42           | 04:01             | 04:06 | 1.65     | 0.14     | 0.52 | 0.18           |
| 48:01             | 08:03               | 0.63     | 0.01     | 0.95 | 0.29           | 06:02             | 07:01 | 7.27     | 1.00     | 0.70 | 0.48           |
| 49:01             | 07:01               | 0.14     | 0.00     | 0.80 | 0.35           | 14:03             | 13:02 | 1.14     | 0.05     | 0.86 | 0.25           |
| 51:01             | 14:02               | 4.53     | 0.29     | 0.92 | 0.68           |                   |       |          |          |      |                |
| 51:02             | 15:02               | 0.88     | 0.03     | 0.87 | 0.24           | A*                | DQB1* | Observed | Expected | D'   | r <sup>2</sup> |
| 52:01             | 12:02 <sup>¶</sup>  | 1.77     | 0.07     | 0.79 | 0.44           | 30:01             | 02:02 | 5.02     | 0.57     | 0.71 | 0.41           |
| 54:01             | 01:02               | 3.65     | 0.65     | 0.95 | 0.17           | 33:03             | 02:01 | 2.99     | 0.45     | 0.57 | 0.17           |
| 57:01             | 06:02               | 1.29     | 0.13     | 0.95 | 0.11           |                   |       |          |          |      |                |
| 58:01             | 03:02 <sup>  </sup> | 6.40     | 0.42     | 0.99 | 0.96           | C*                | DQB1* | Observed | Expected | D'   | r <sup>2</sup> |
|                   |                     |          |          |      |                | 03:02             | 02:01 | 3.38     | 0.32     | 0.67 | 0.33           |
|                   |                     |          |          |      |                | 03:02             | 06:09 | 1.77     | 0.14     | 0.83 | 0.21           |
|                   |                     |          |          |      |                | 06:02             | 02:02 | 6.27     | 0.82     | 0.73 | 0.44           |
|                   |                     |          |          |      |                | 14:03             | 06:04 | 1.10     | 0.02     | 0.84 | 0.53           |

Observed HF $\geq$ 0.1%, D' $>$ 0.5, r<sup>2</sup> $>$ 0.1, P $<$ 1 $\times$ 10<sup>-11</sup>.<sup>†</sup>, <sup>‡</sup>, <sup>§</sup>, <sup>¶</sup>, <sup>||</sup> show strong linkage for 3-locus haplotypes (A-C-B).

**Supplementary Table 4:** Observed and expected haplotypes for patients (2n=4304).

| Category        | Observed haplotype (Segregation analysis) |                  |                   | Expected haplotype (EM algorithm) |                  |                   |
|-----------------|-------------------------------------------|------------------|-------------------|-----------------------------------|------------------|-------------------|
|                 | Total                                     | Common           | Less-common       | Total                             | Common           | Less-common       |
| Overlapping     | 1228*                                     | 124 <sup>†</sup> | 1104 <sup>‡</sup> | 1228*                             | 146 <sup>†</sup> | 1079 <sup>‡</sup> |
| Non-overlapping | 822                                       | 0                | 822               | 624                               | 0                | 624               |
| Total           | 2050                                      | 124              | 1926              | 1852                              | 146              | 1703              |

Chi-square test for tend was performed between observed and expected haplotypes ( $\alpha=0.05$ ). \* $P=0.2426$ ; <sup>†</sup> $P=0.03698$ ; <sup>‡</sup> $P=0.1582$ .

**Supplementary Table 5:** Negative linkage disequilibriums (LDs) for expected only, observed only, and the overlapping data.

| Numbers of negative LDs in a 5-locus haplotype | Expected only (n=624) |            | Observed only (n=822) |            | Overlapping (n=1228) |            |                      |            |
|------------------------------------------------|-----------------------|------------|-----------------------|------------|----------------------|------------|----------------------|------------|
|                                                | Count                 | Proportion | Count                 | Proportion | Common (n=124)       |            | Less-common (n=1104) |            |
|                                                |                       |            |                       |            | Count                | Proportion | Count                | Proportion |
| 8                                              | 3                     | 0.5%       | 2                     | 0.2%       | 0                    | 0.0%       | 0                    | 0.0%       |
| 7                                              | 5                     | 0.8%       | 2                     | 0.2%       | 0                    | 0.0%       | 7                    | 0.6%       |
| 6                                              | 26                    | 4.2%       | 30                    | 3.6%       | 3                    | 0.2%       | 19                   | 1.5%       |
| 5                                              | 18                    | 2.9%       | 16                    | 1.9%       | 2                    | 0.2%       | 21                   | 1.7%       |
| 4                                              | 55                    | 8.8%       | 55                    | 6.7%       | 0                    | 0.0%       | 43                   | 3.5%       |
| 3                                              | 70                    | 11.2%      | 46                    | 5.6%       | 4                    | 0.3%       | 75                   | 6.1%       |
| 2                                              | 122                   | 19.6%      | 109                   | 13.3%      | 3                    | 0.2%       | 127                  | 10.3%      |
| 1                                              | 217                   | 34.8%      | 177                   | 21.5%      | 5                    | 0.4%       | 238                  | 19.4%      |
| Total                                          | 516                   | 83.0%      | 437                   | 53.0%      | 17                   | 1.0%       | 530                  | 43.0%      |
